# Supplementary material for: Visualization of Genome Signatures of Eukaryote Genomes by Batch-Learning Self-Organizing Map with a Special Emphasis onDrosophilaGenomes
Source: Hindawi journal article supplement (doi:10.1155/2014/985706), 2014-01-01

Supplementary Figure S1.

Level of each pair of complimentary tetranucleotide in 100-kb DegeTetra-BLSOM for the overlapping 100-kb sequences of 101 eukaryotic genomes.

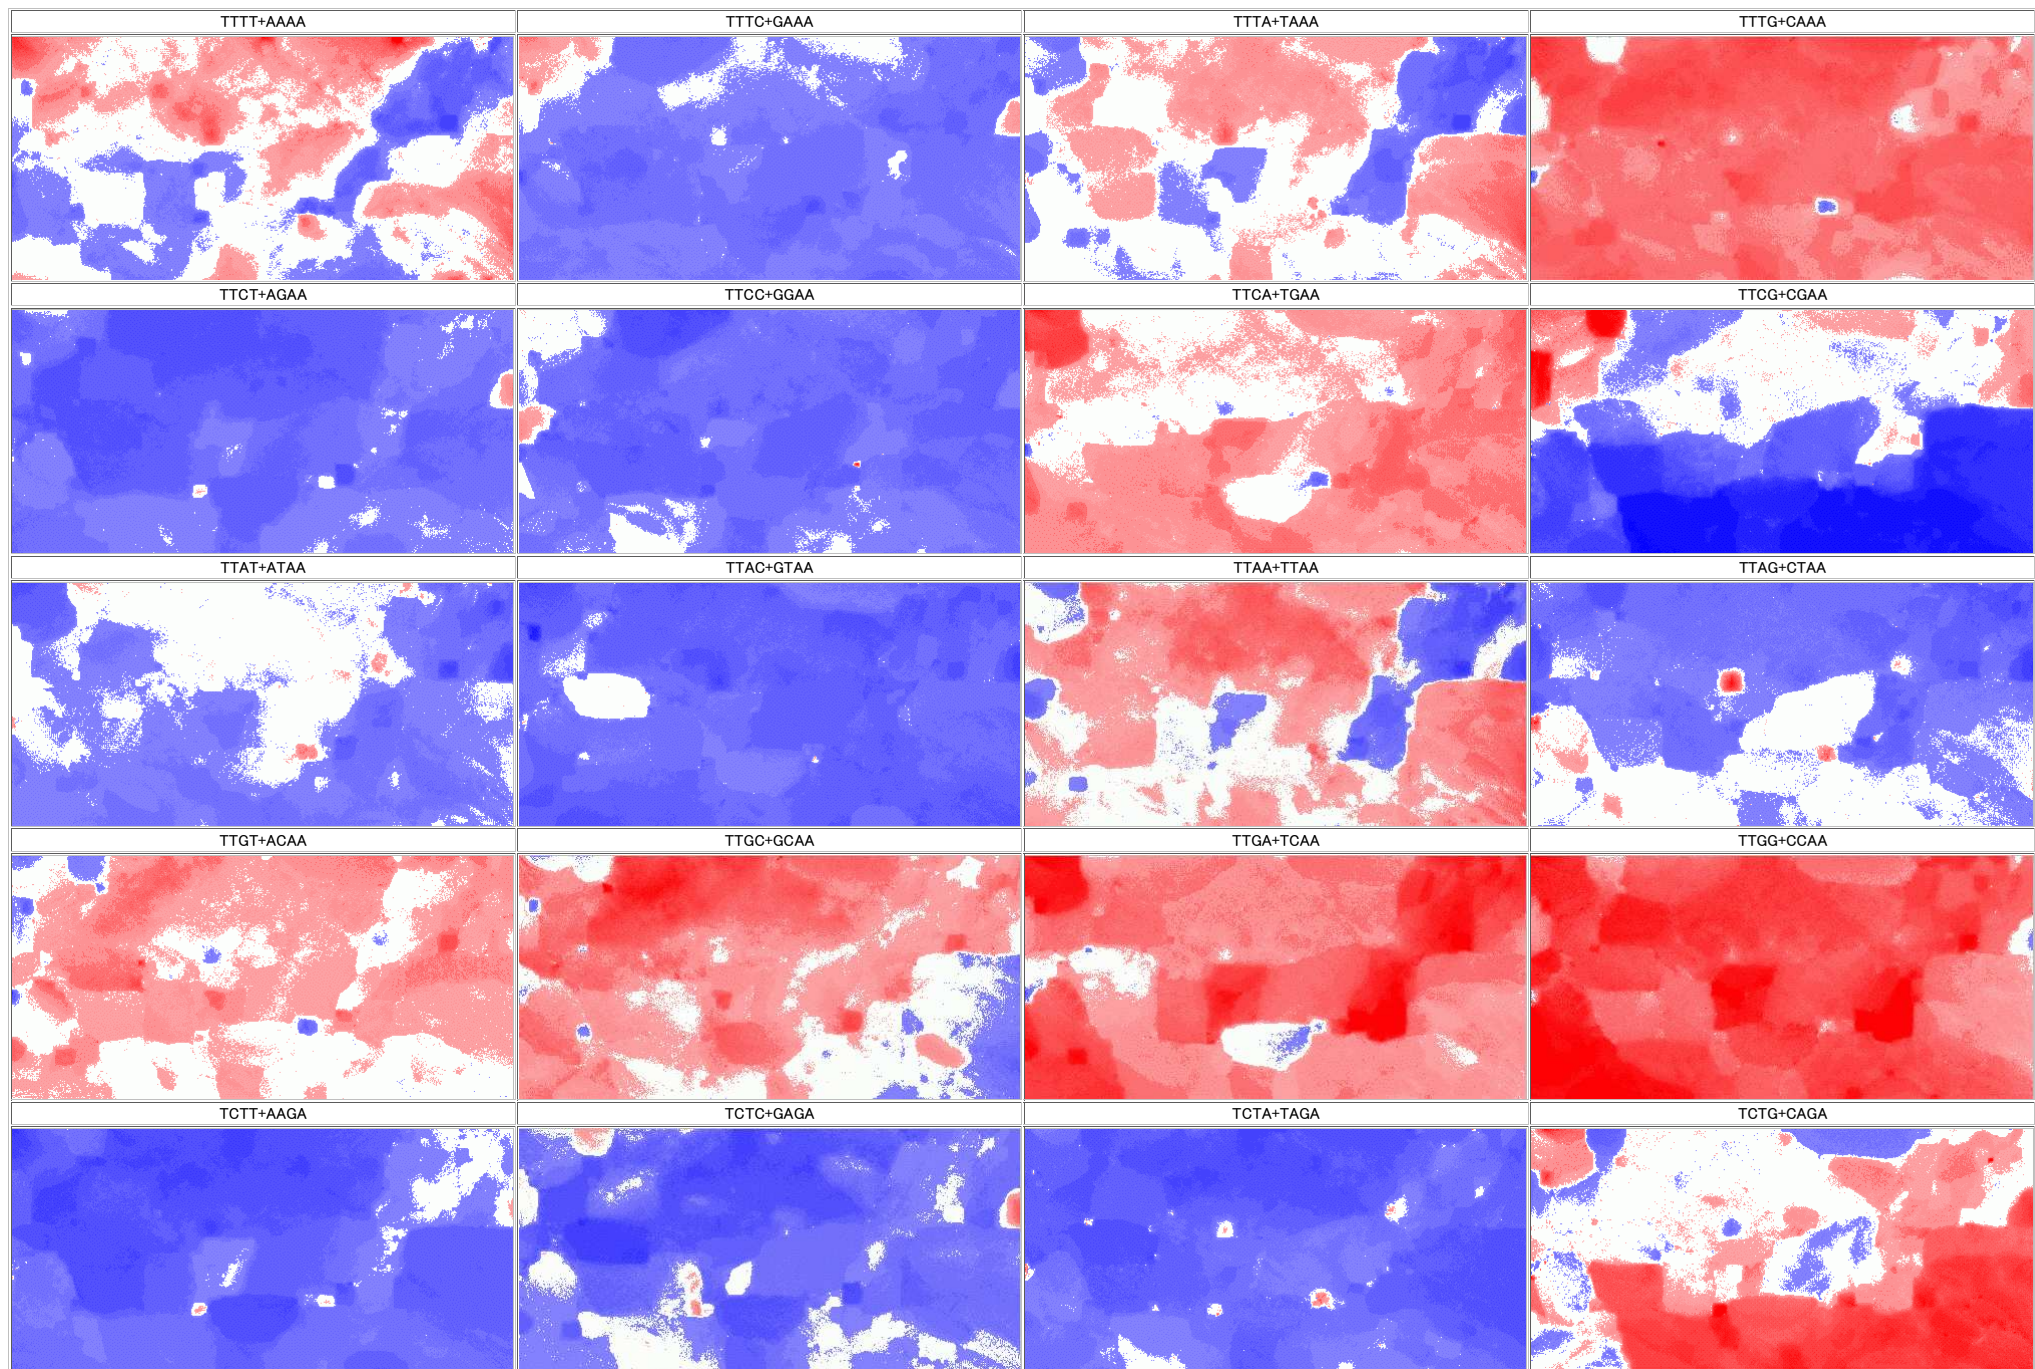

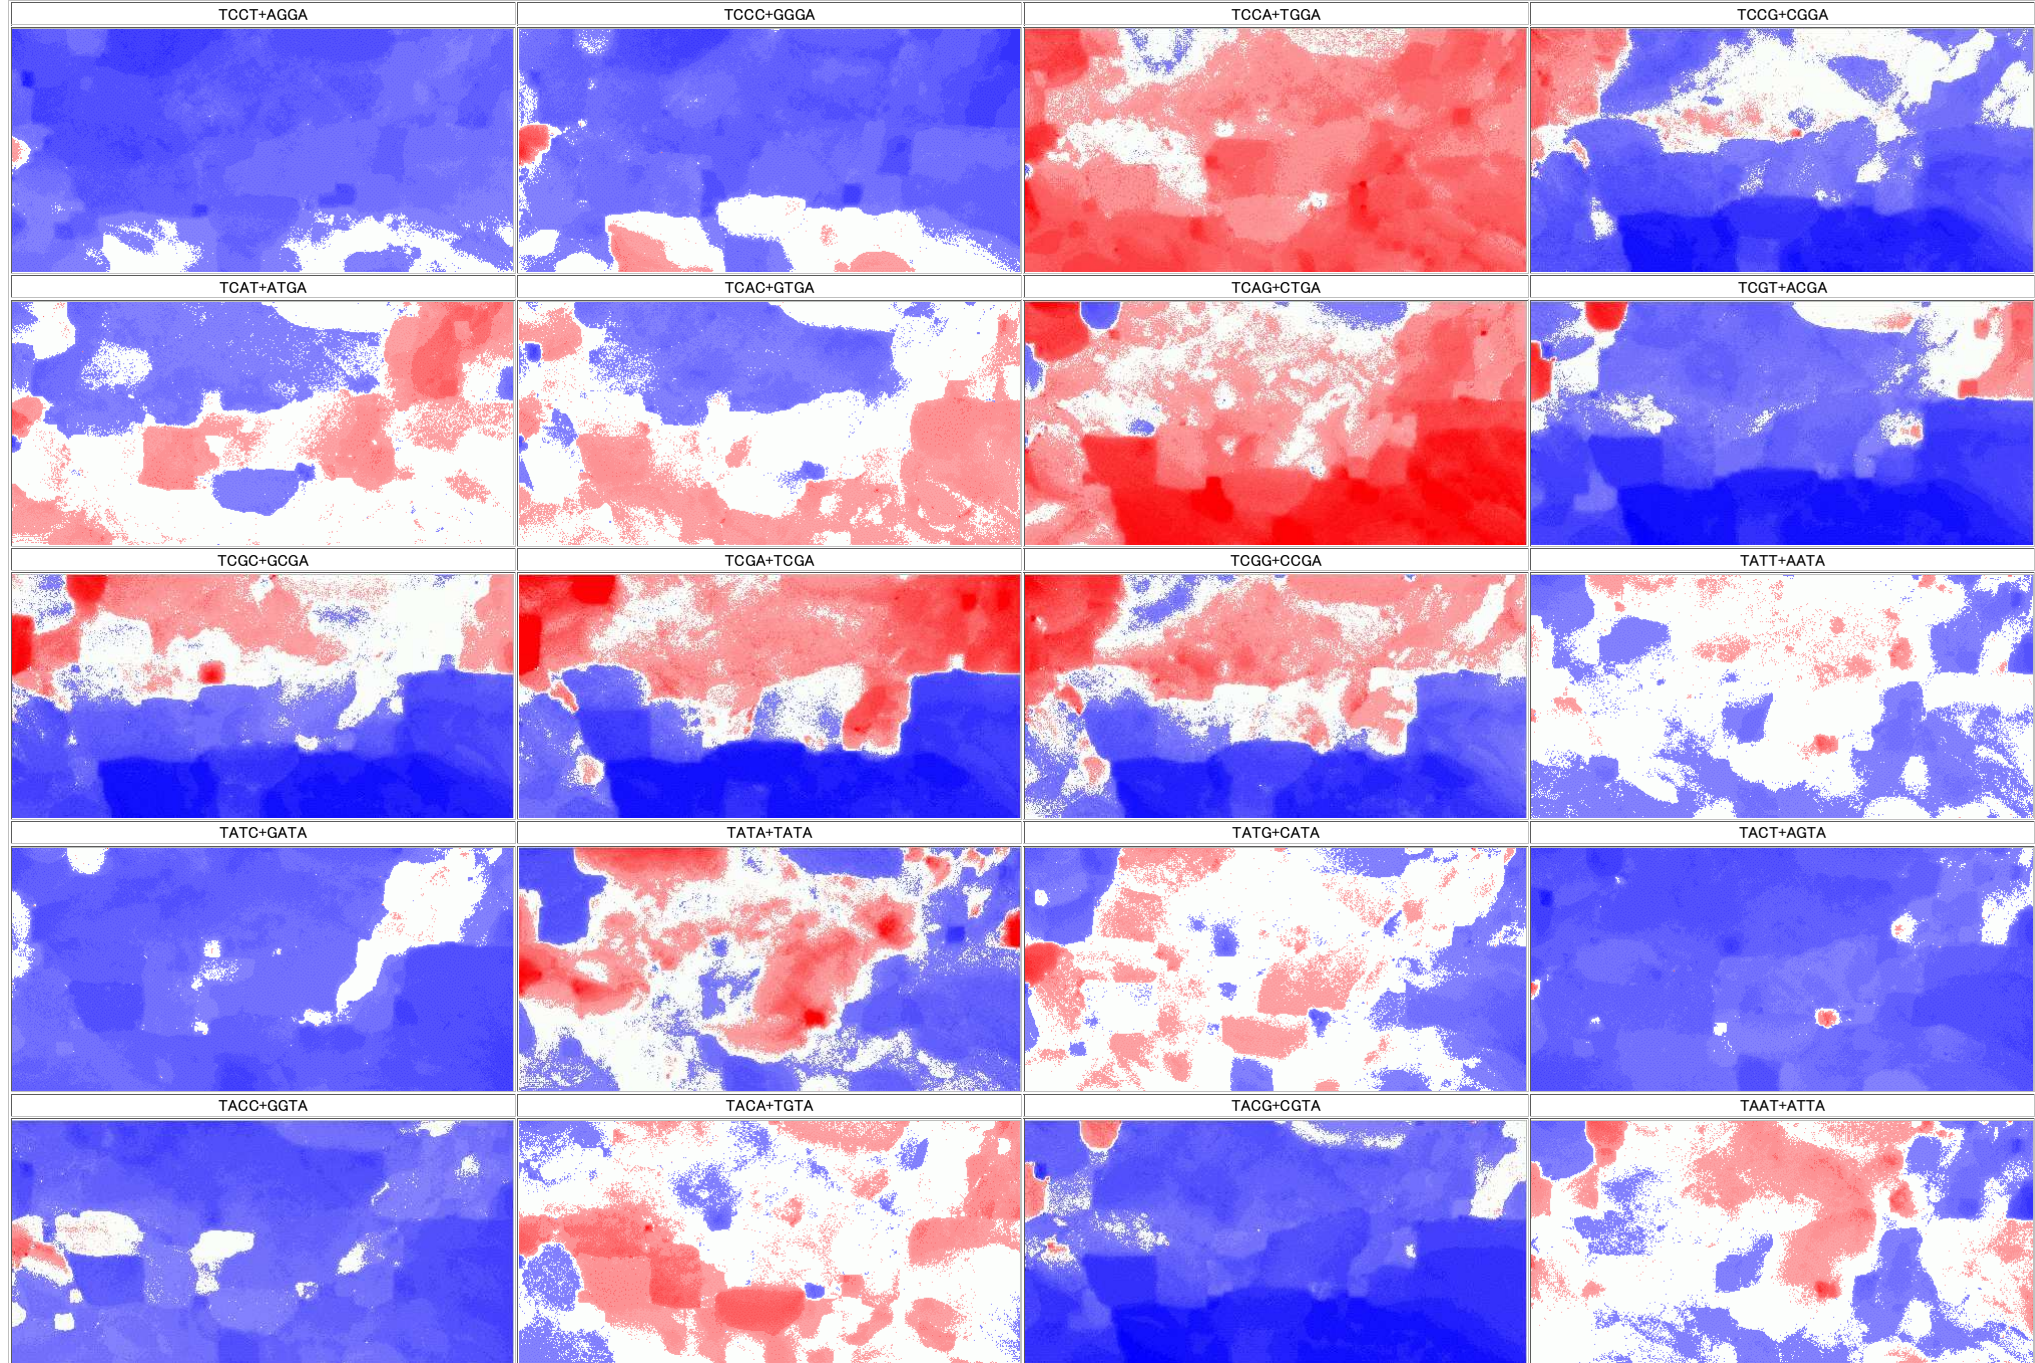

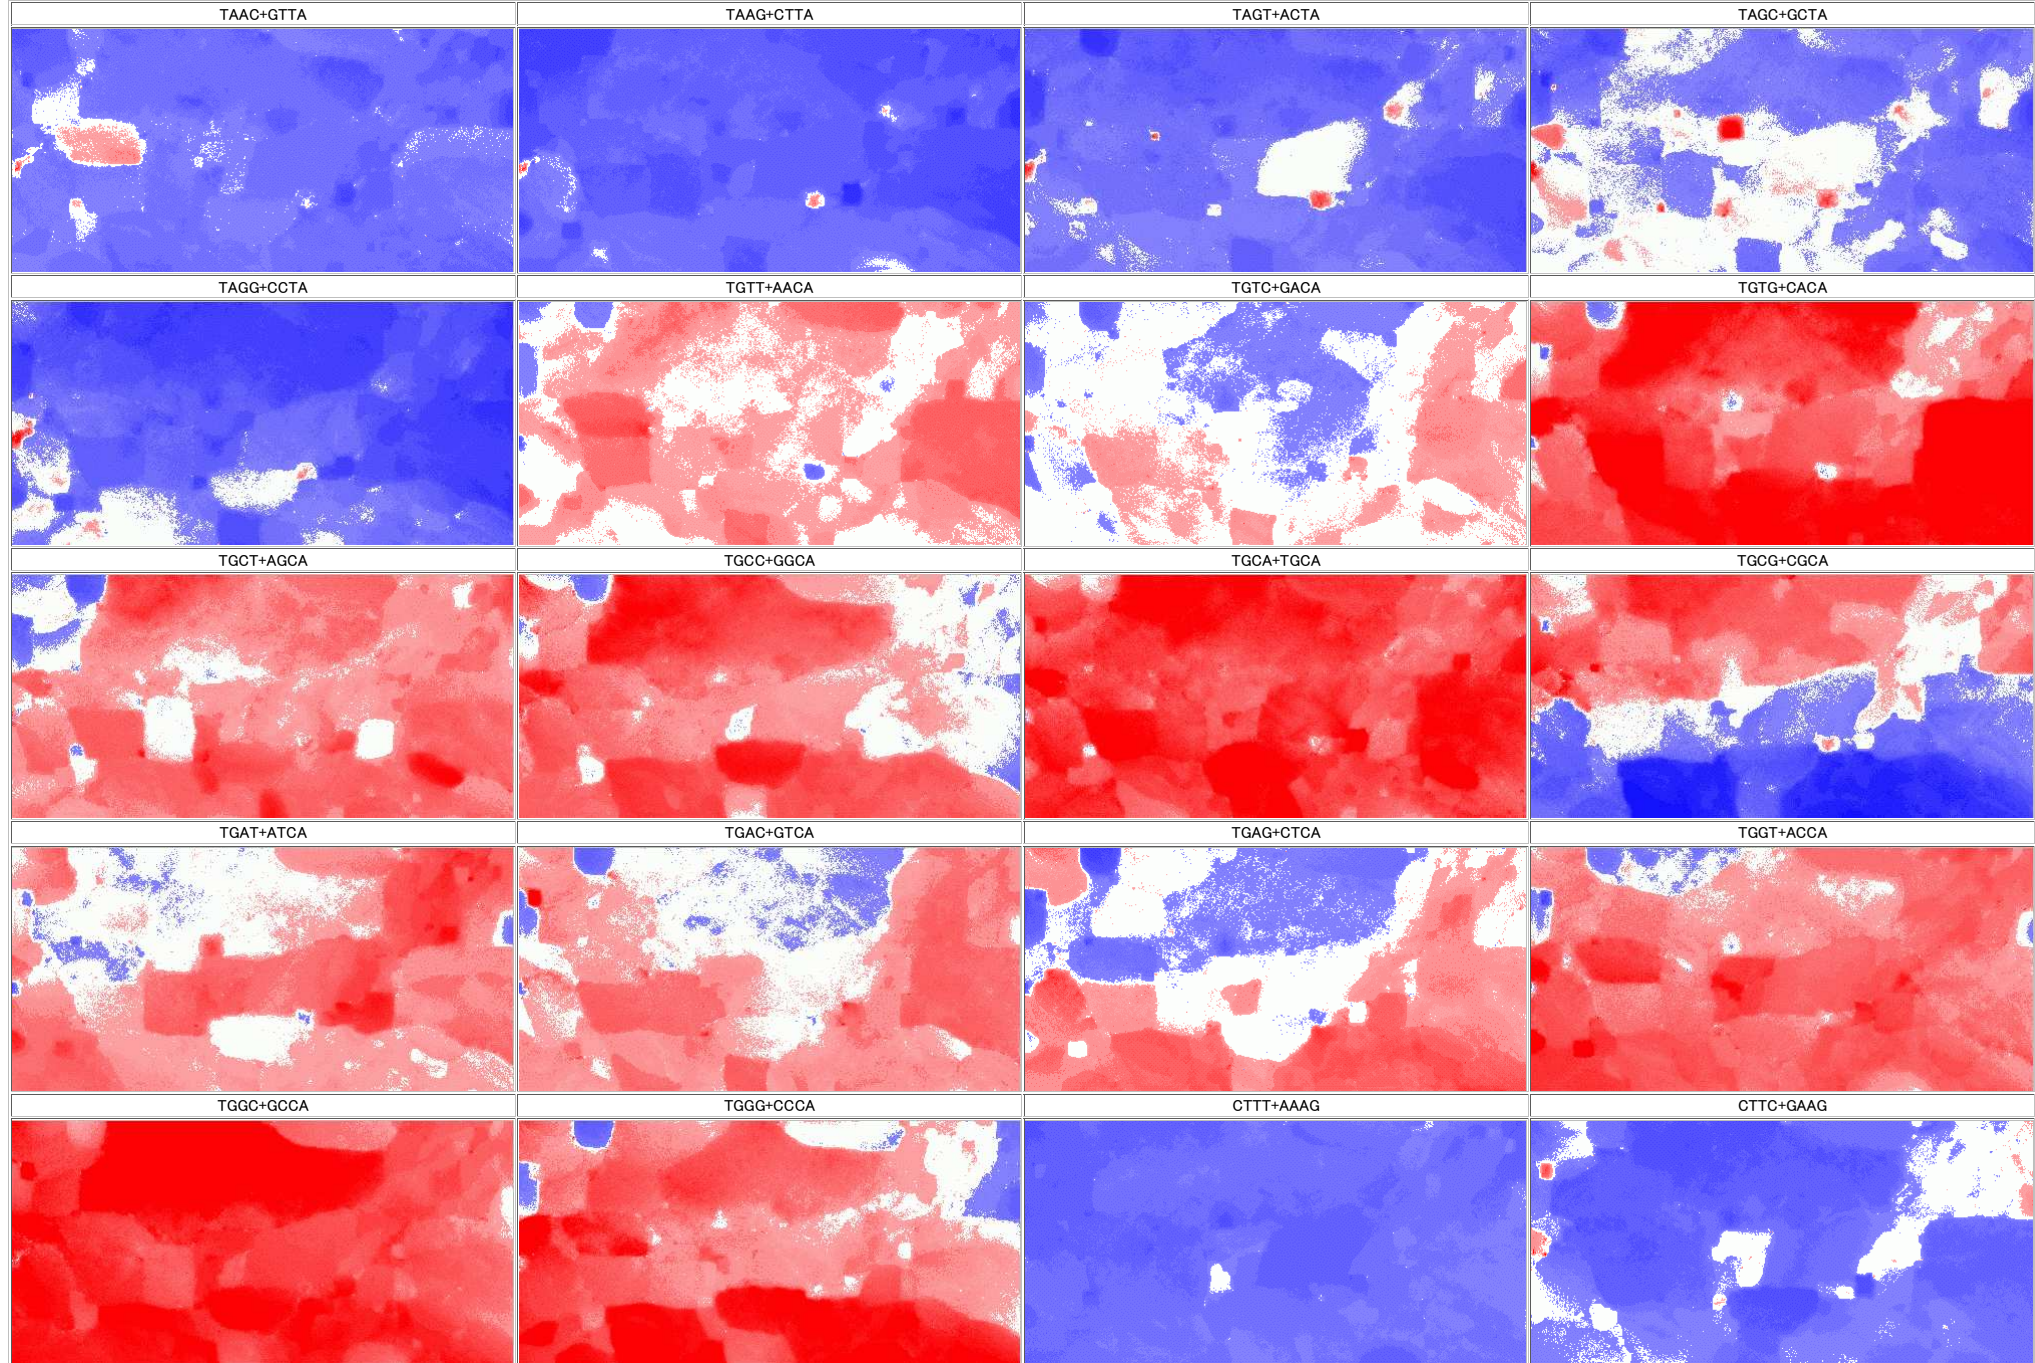

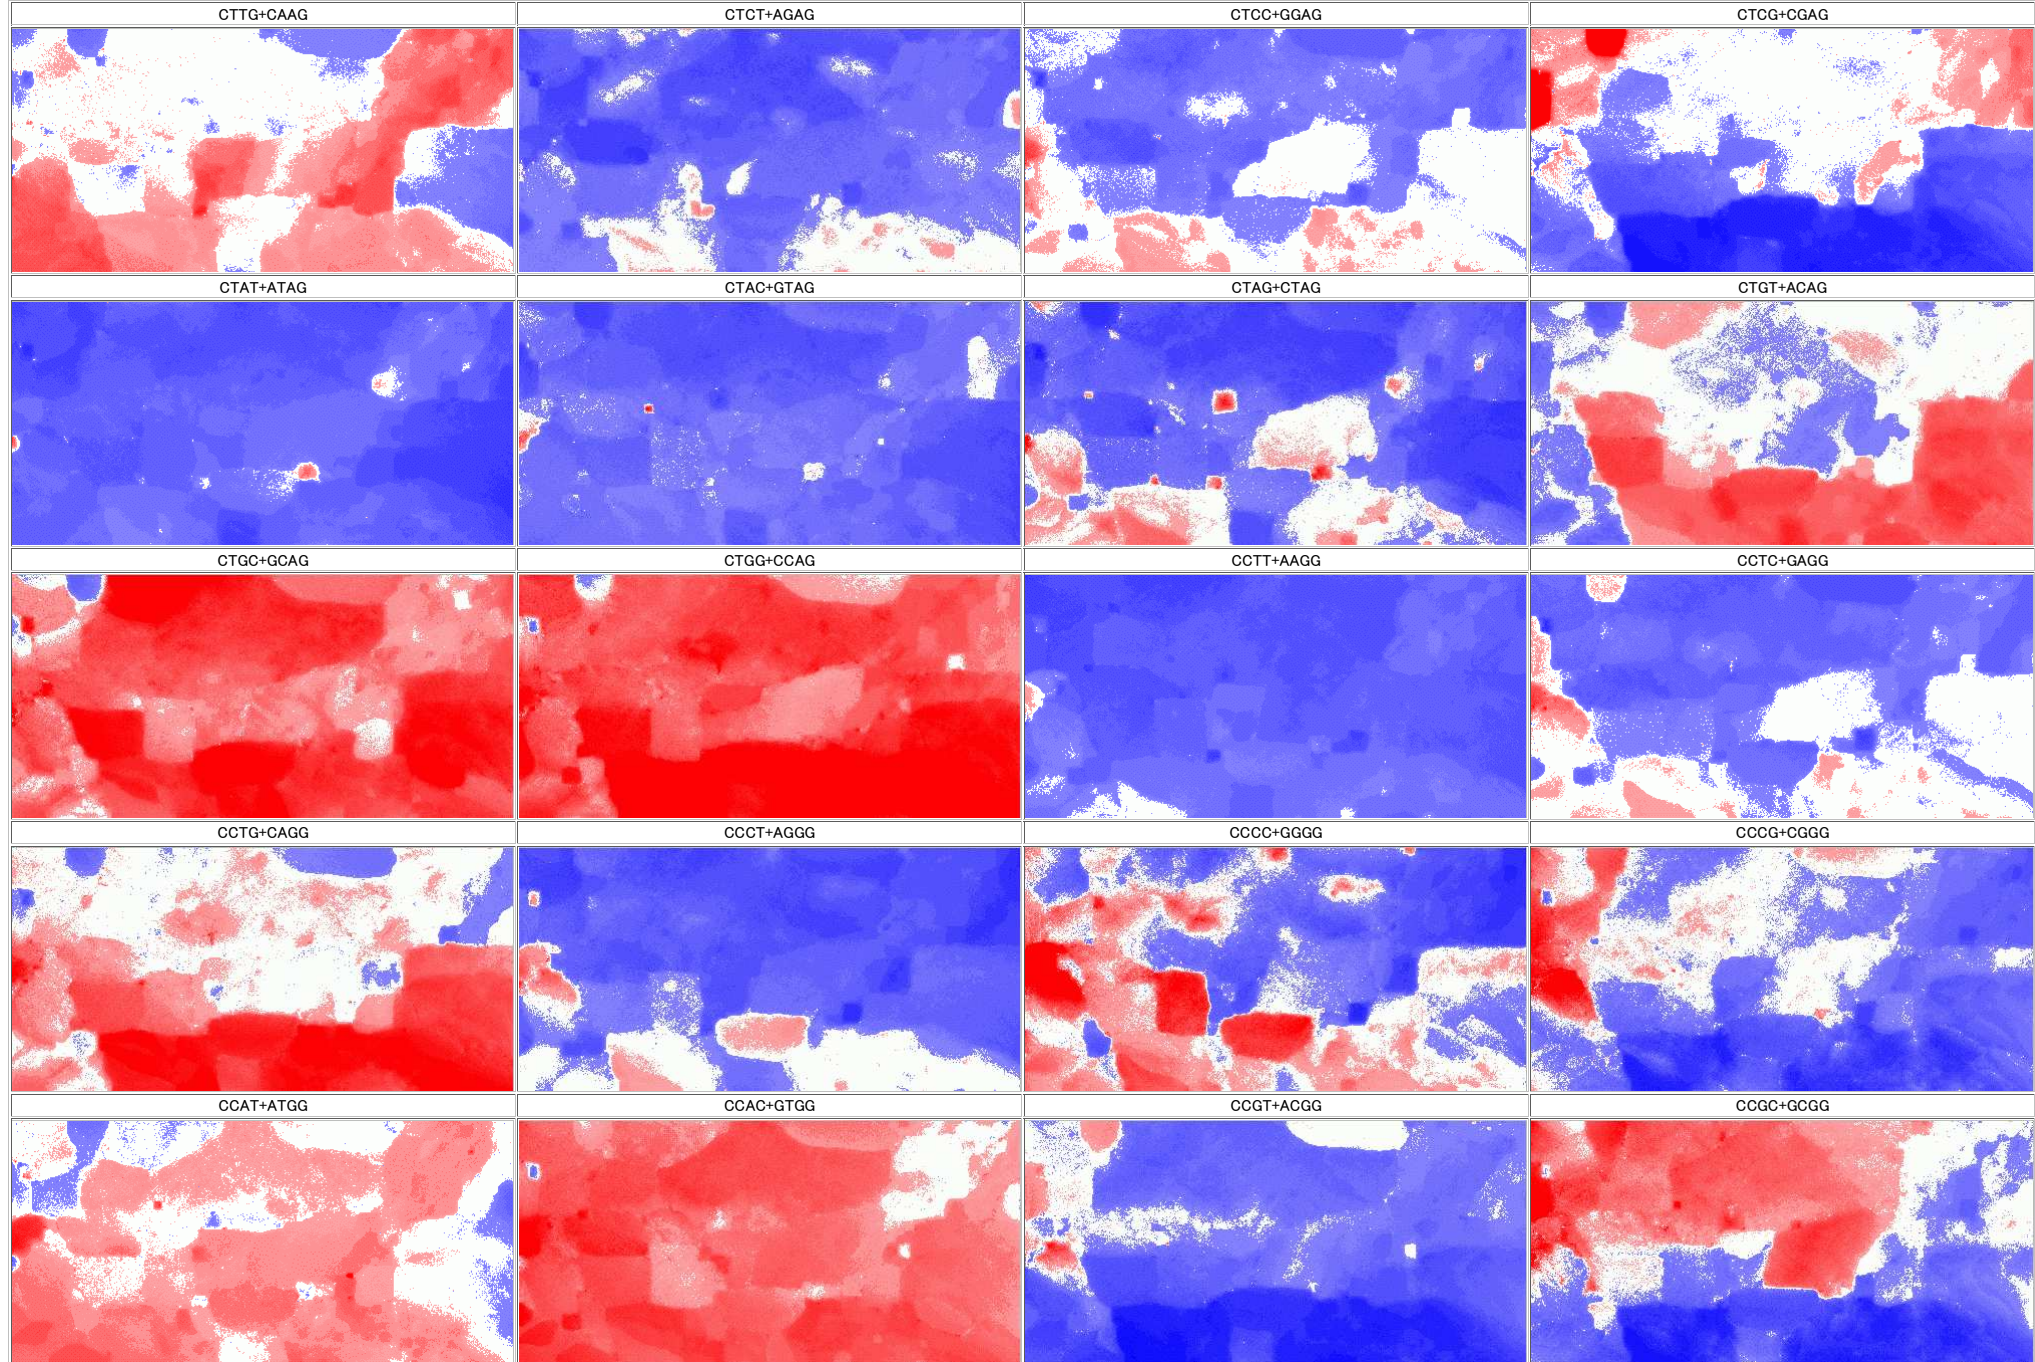

Supplementary Figure S1

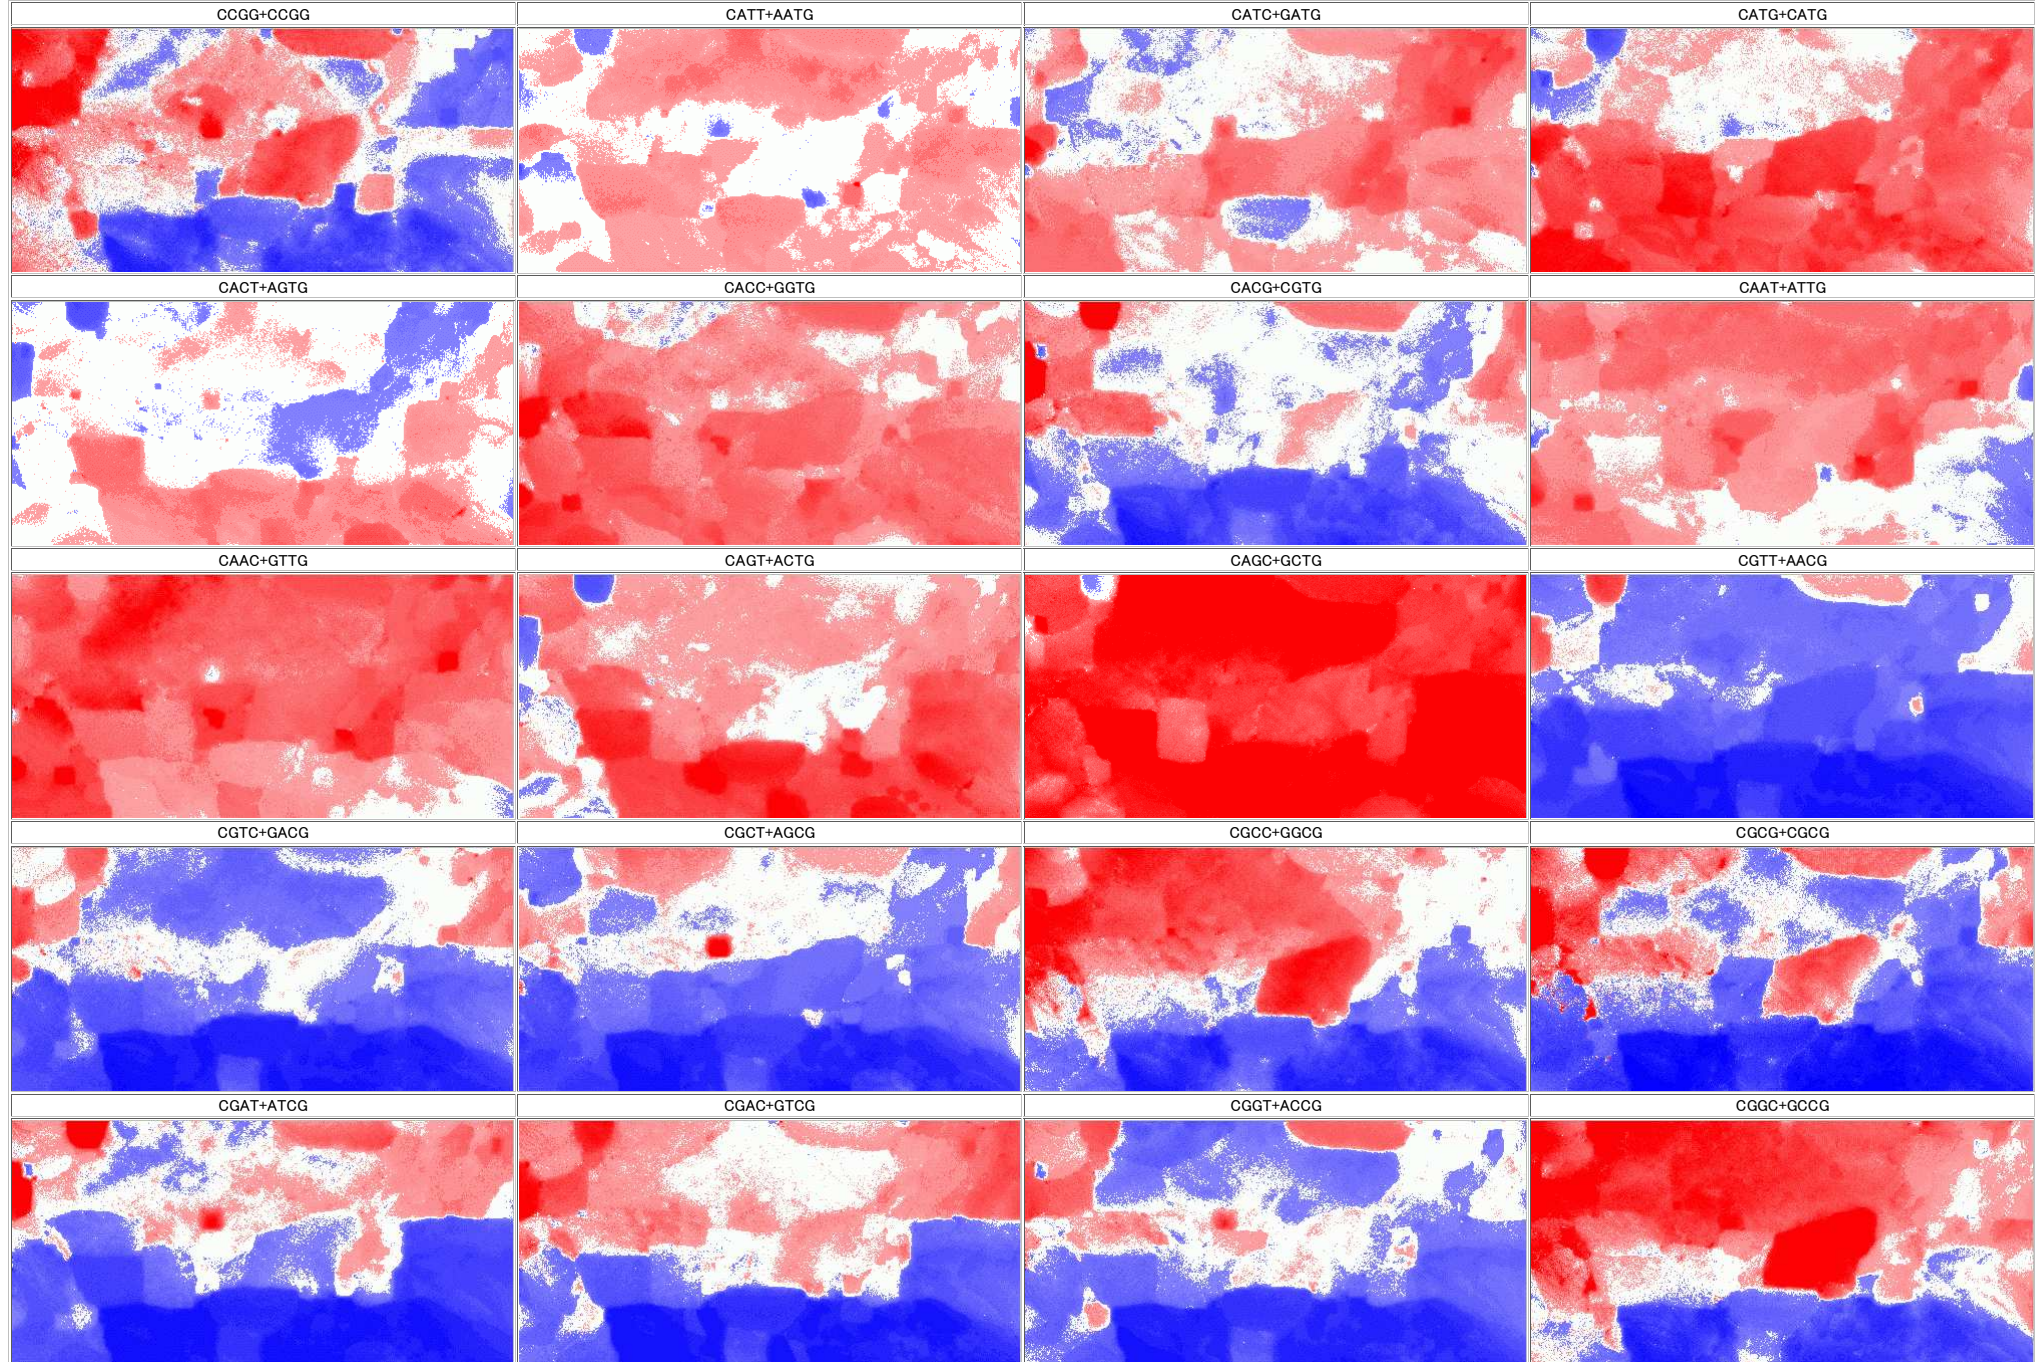

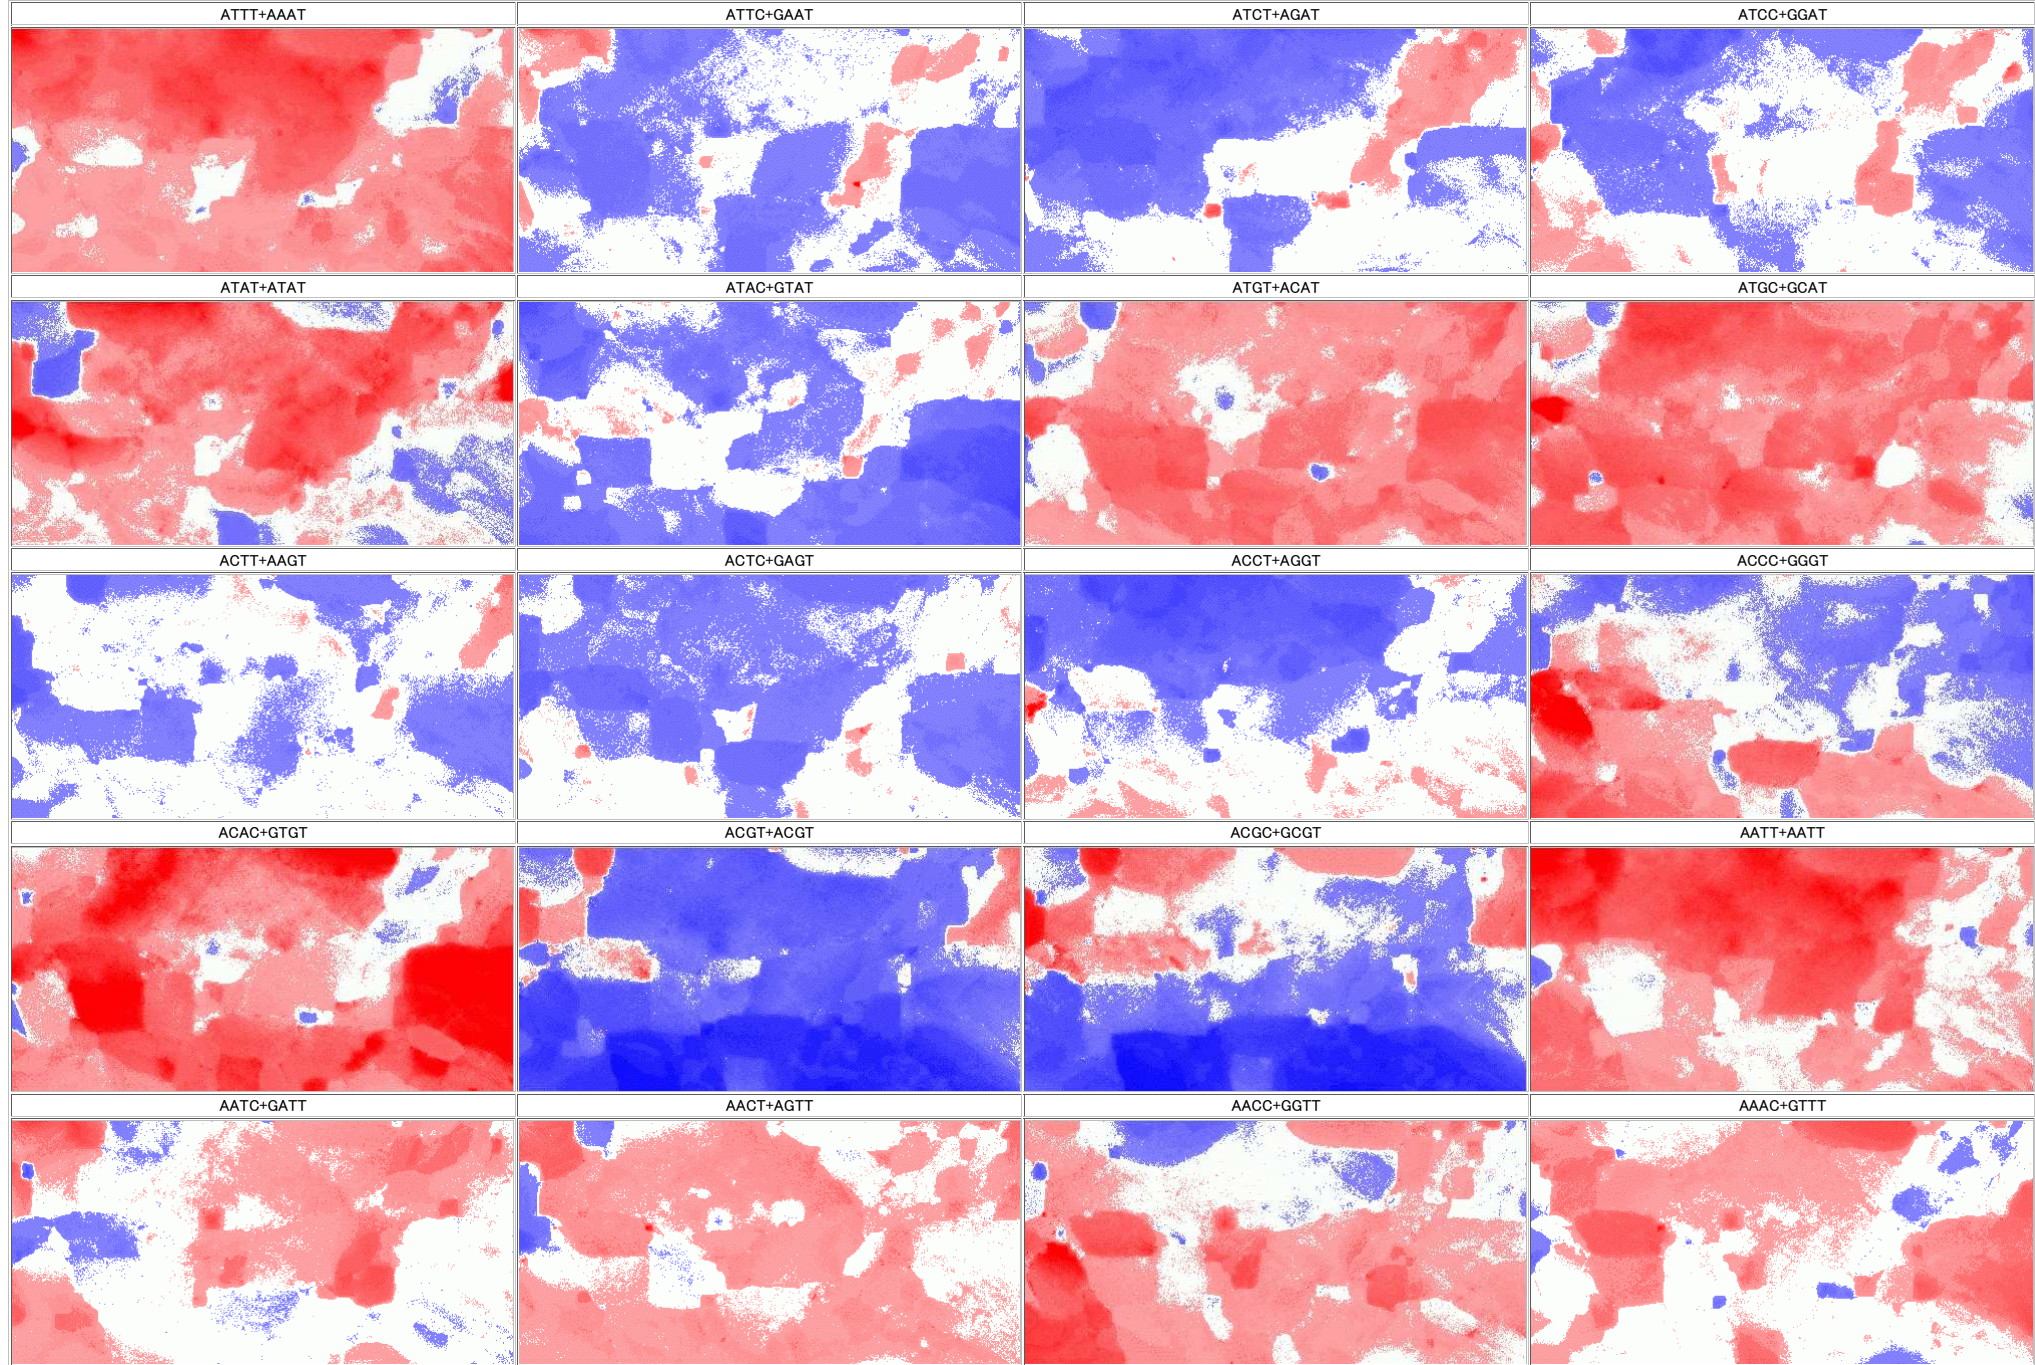

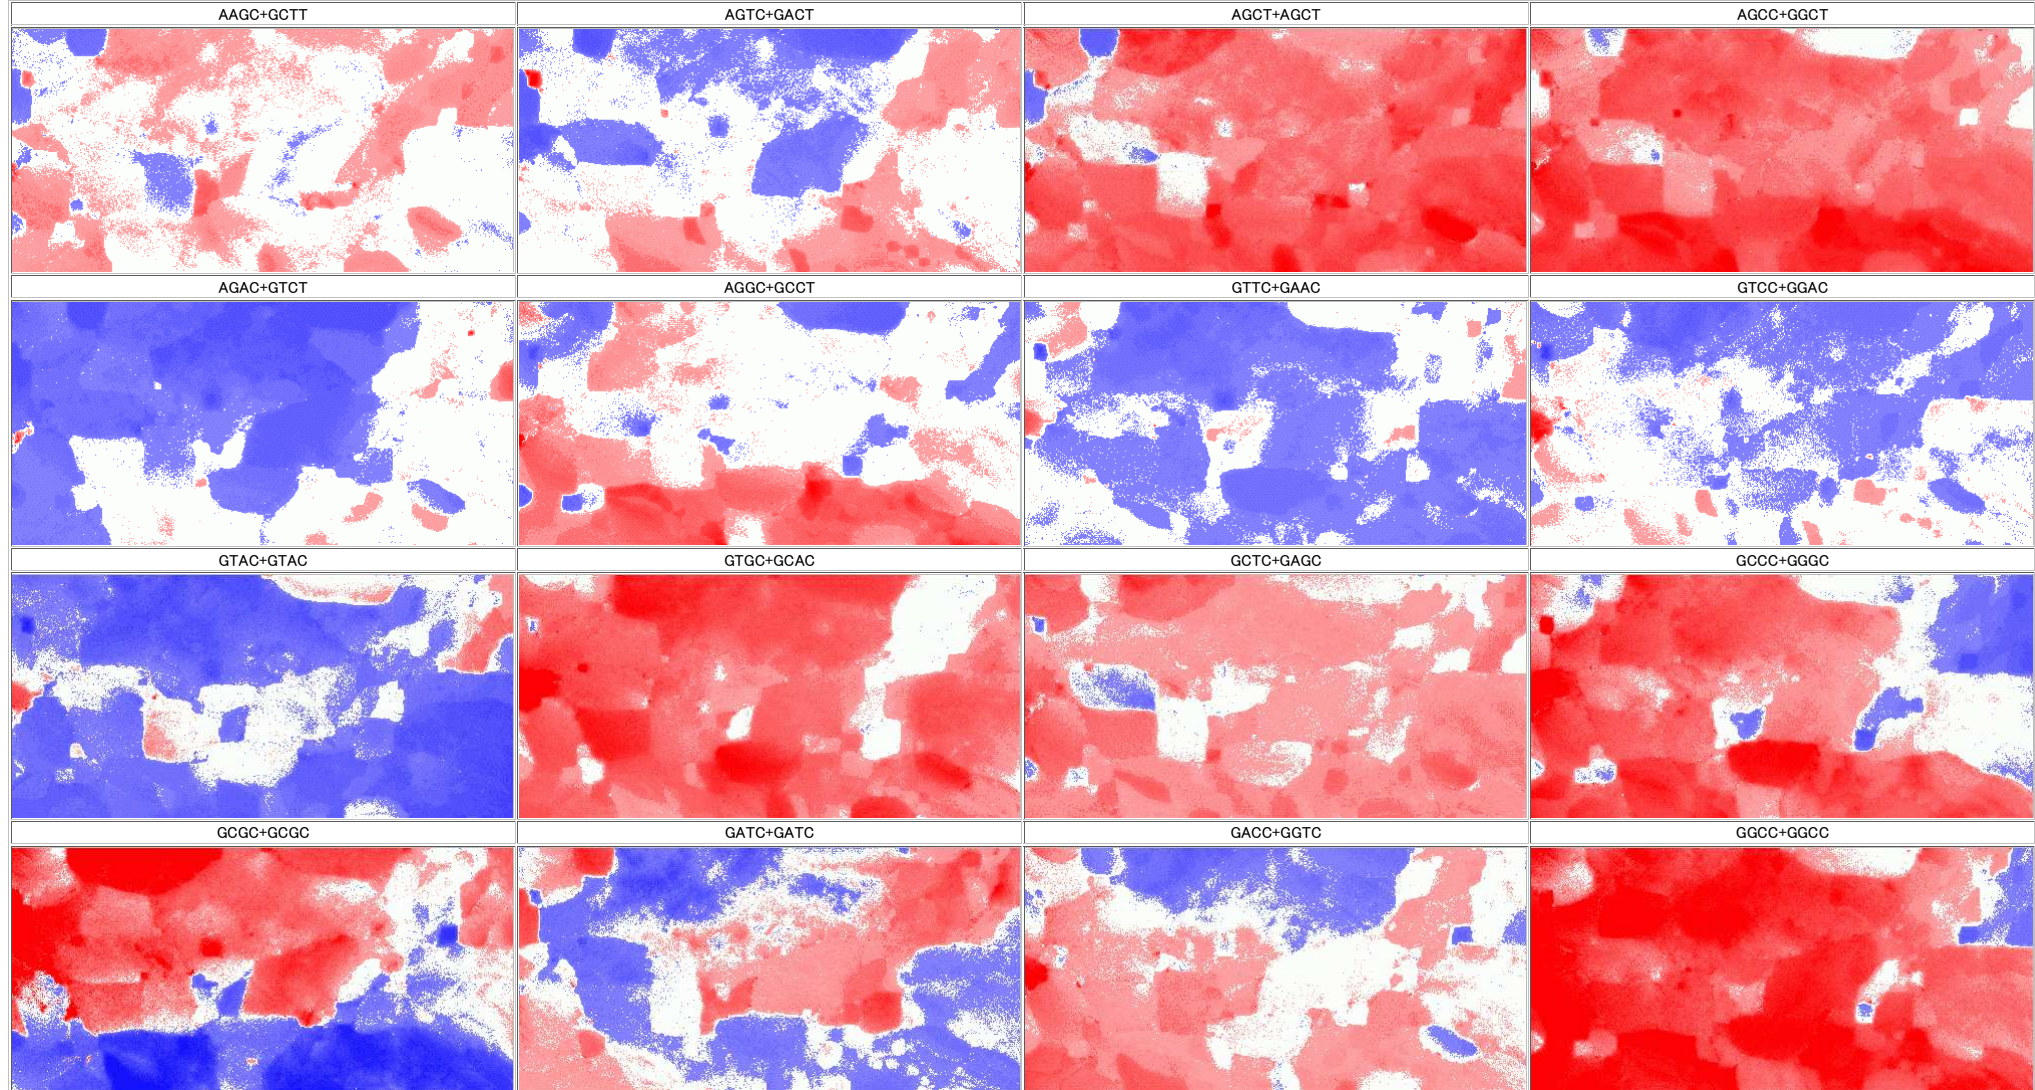

# Supplementary Figure S2.

Level of each pair of complimentary pentanucleotide in 100-kb DegePenta-BLSOM for the overlapping 100-kb sequences of 101 eukaryotic genomes.

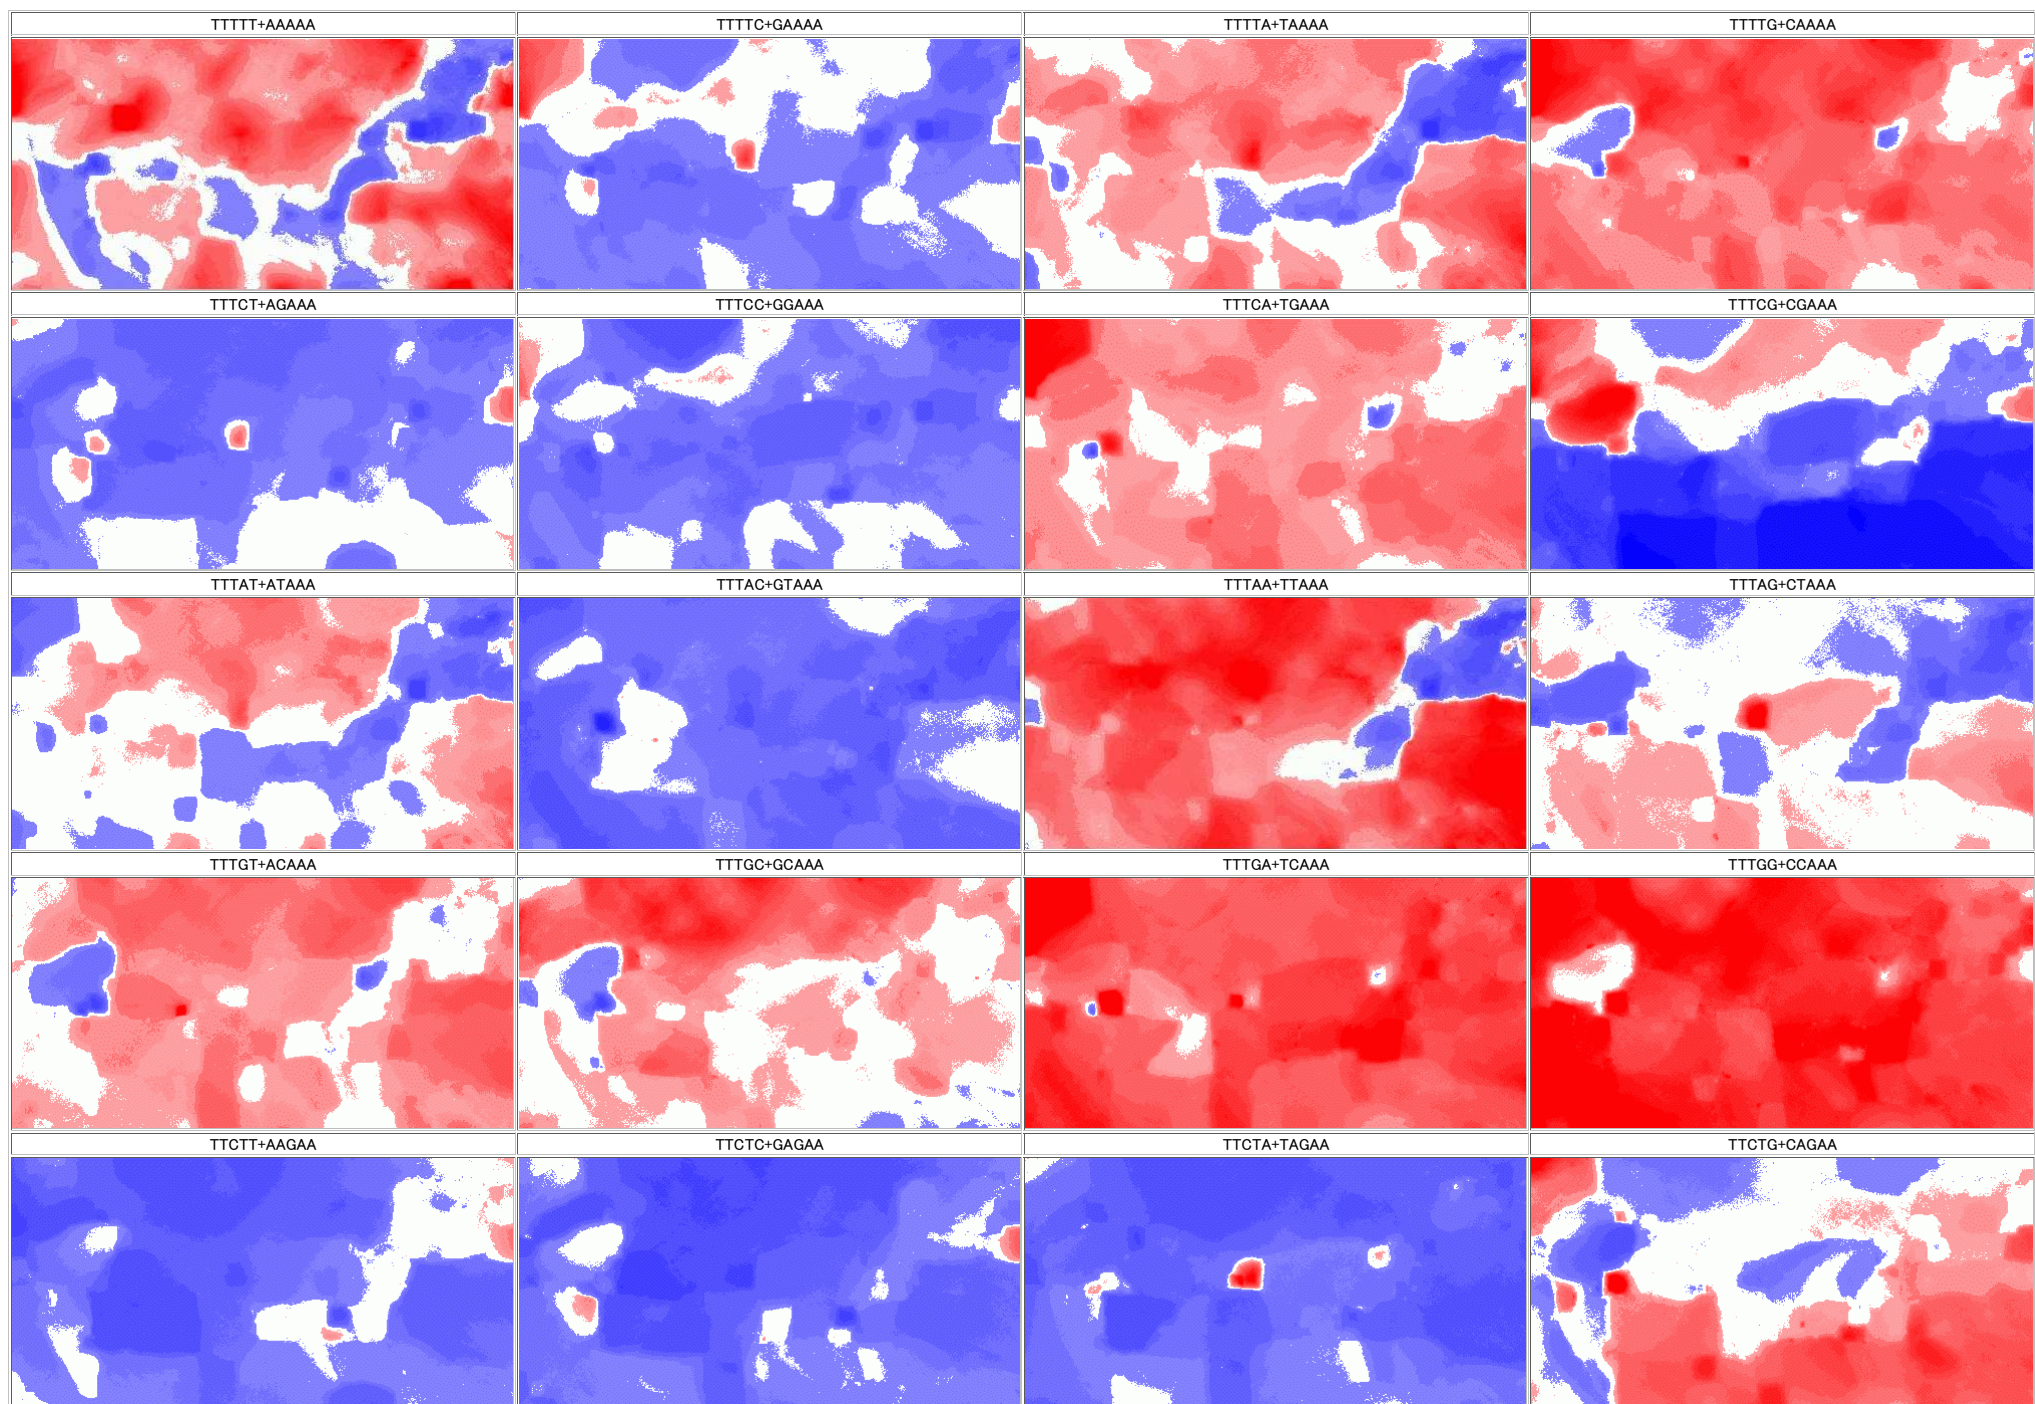



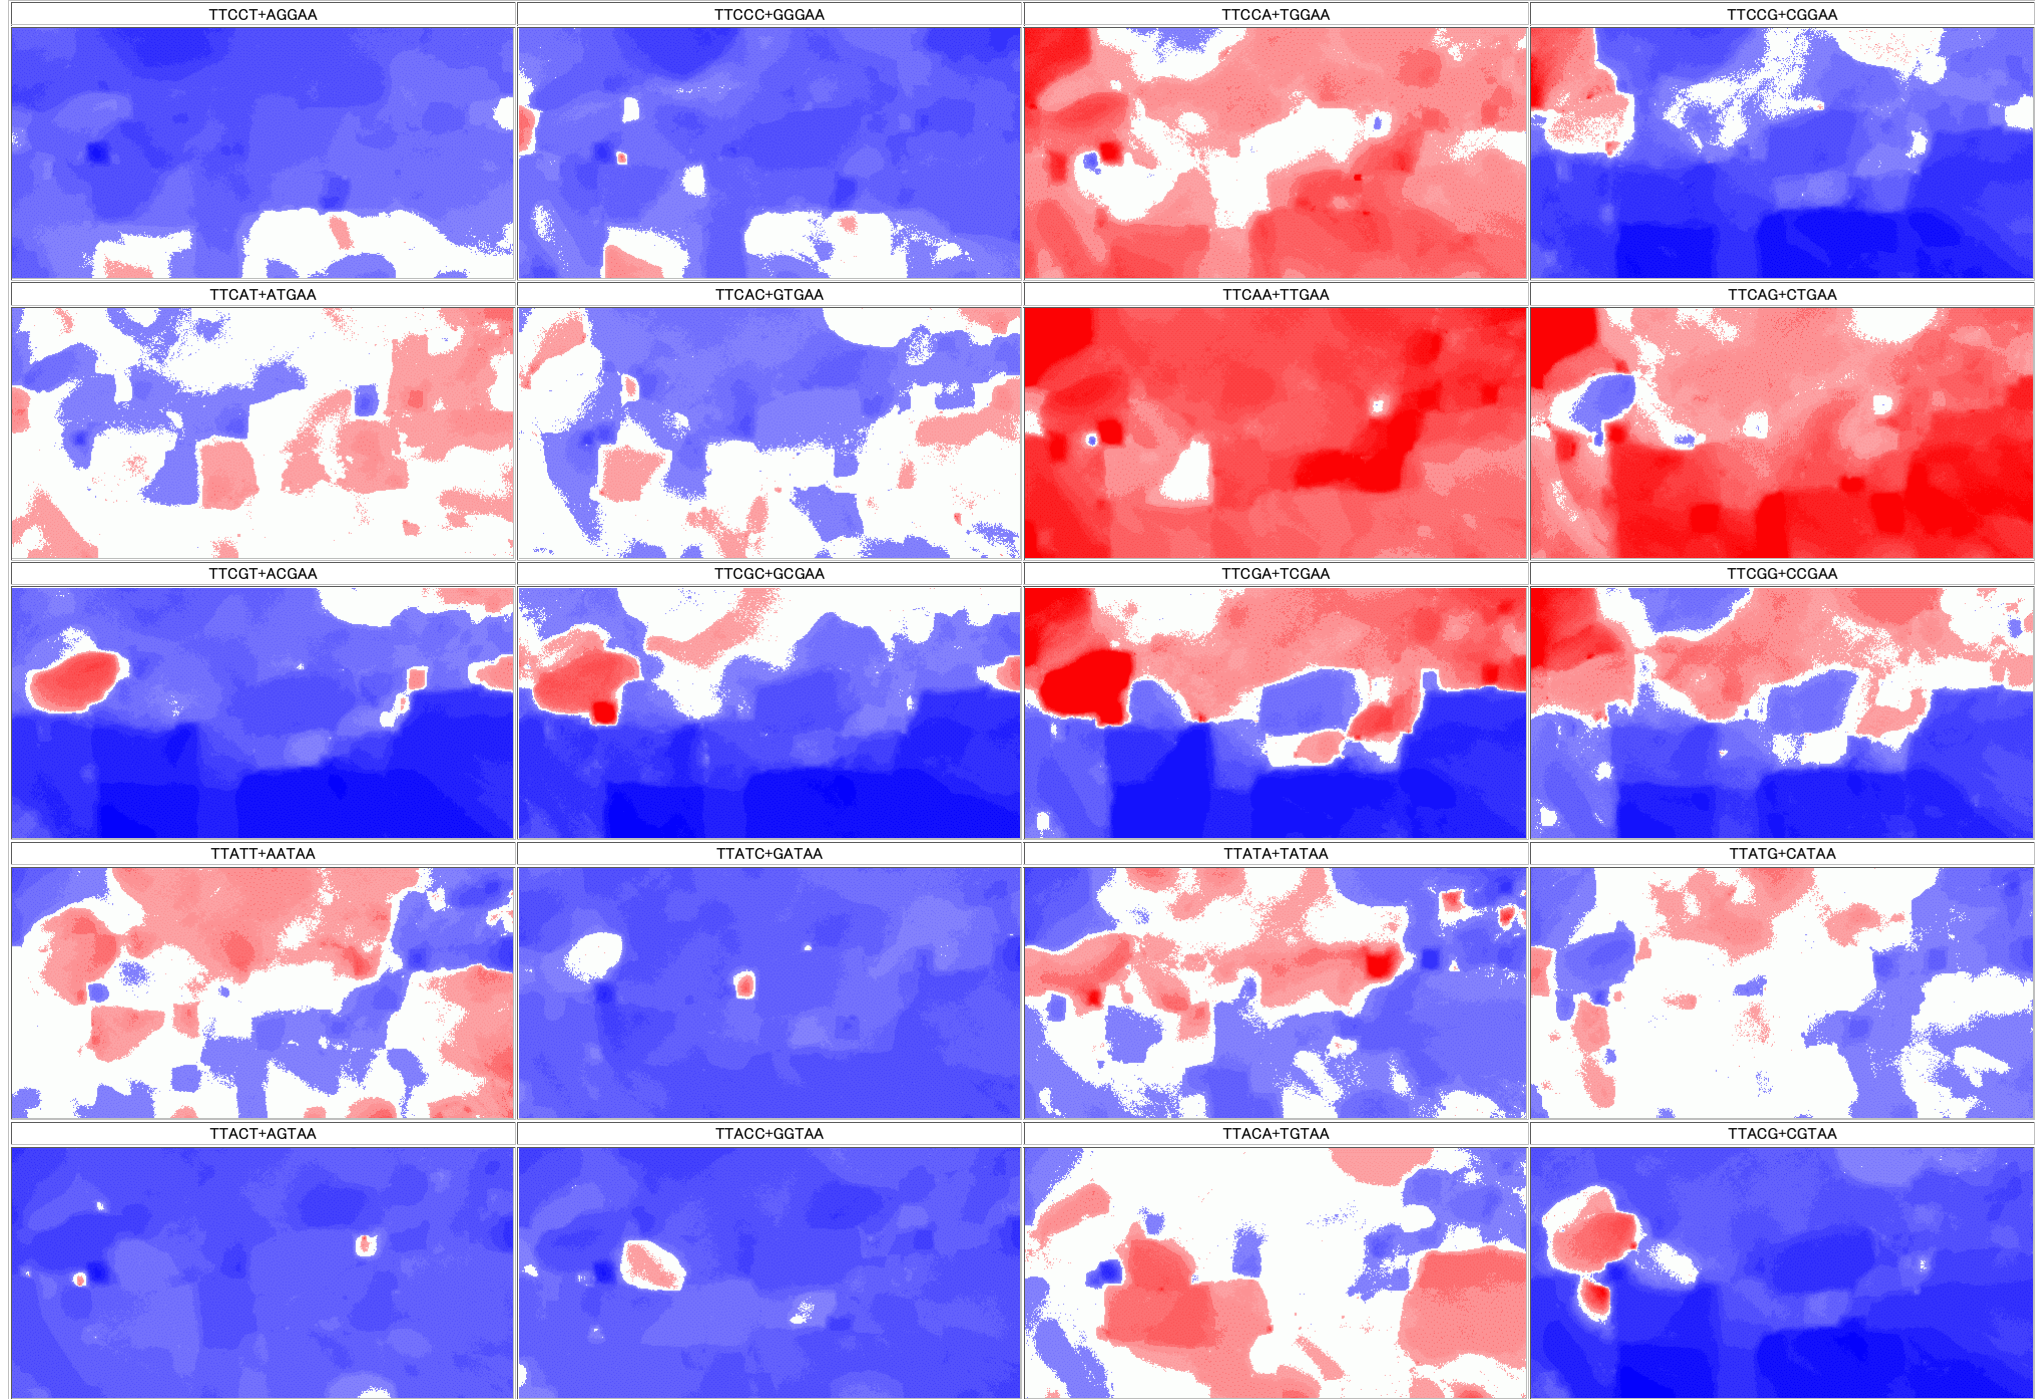

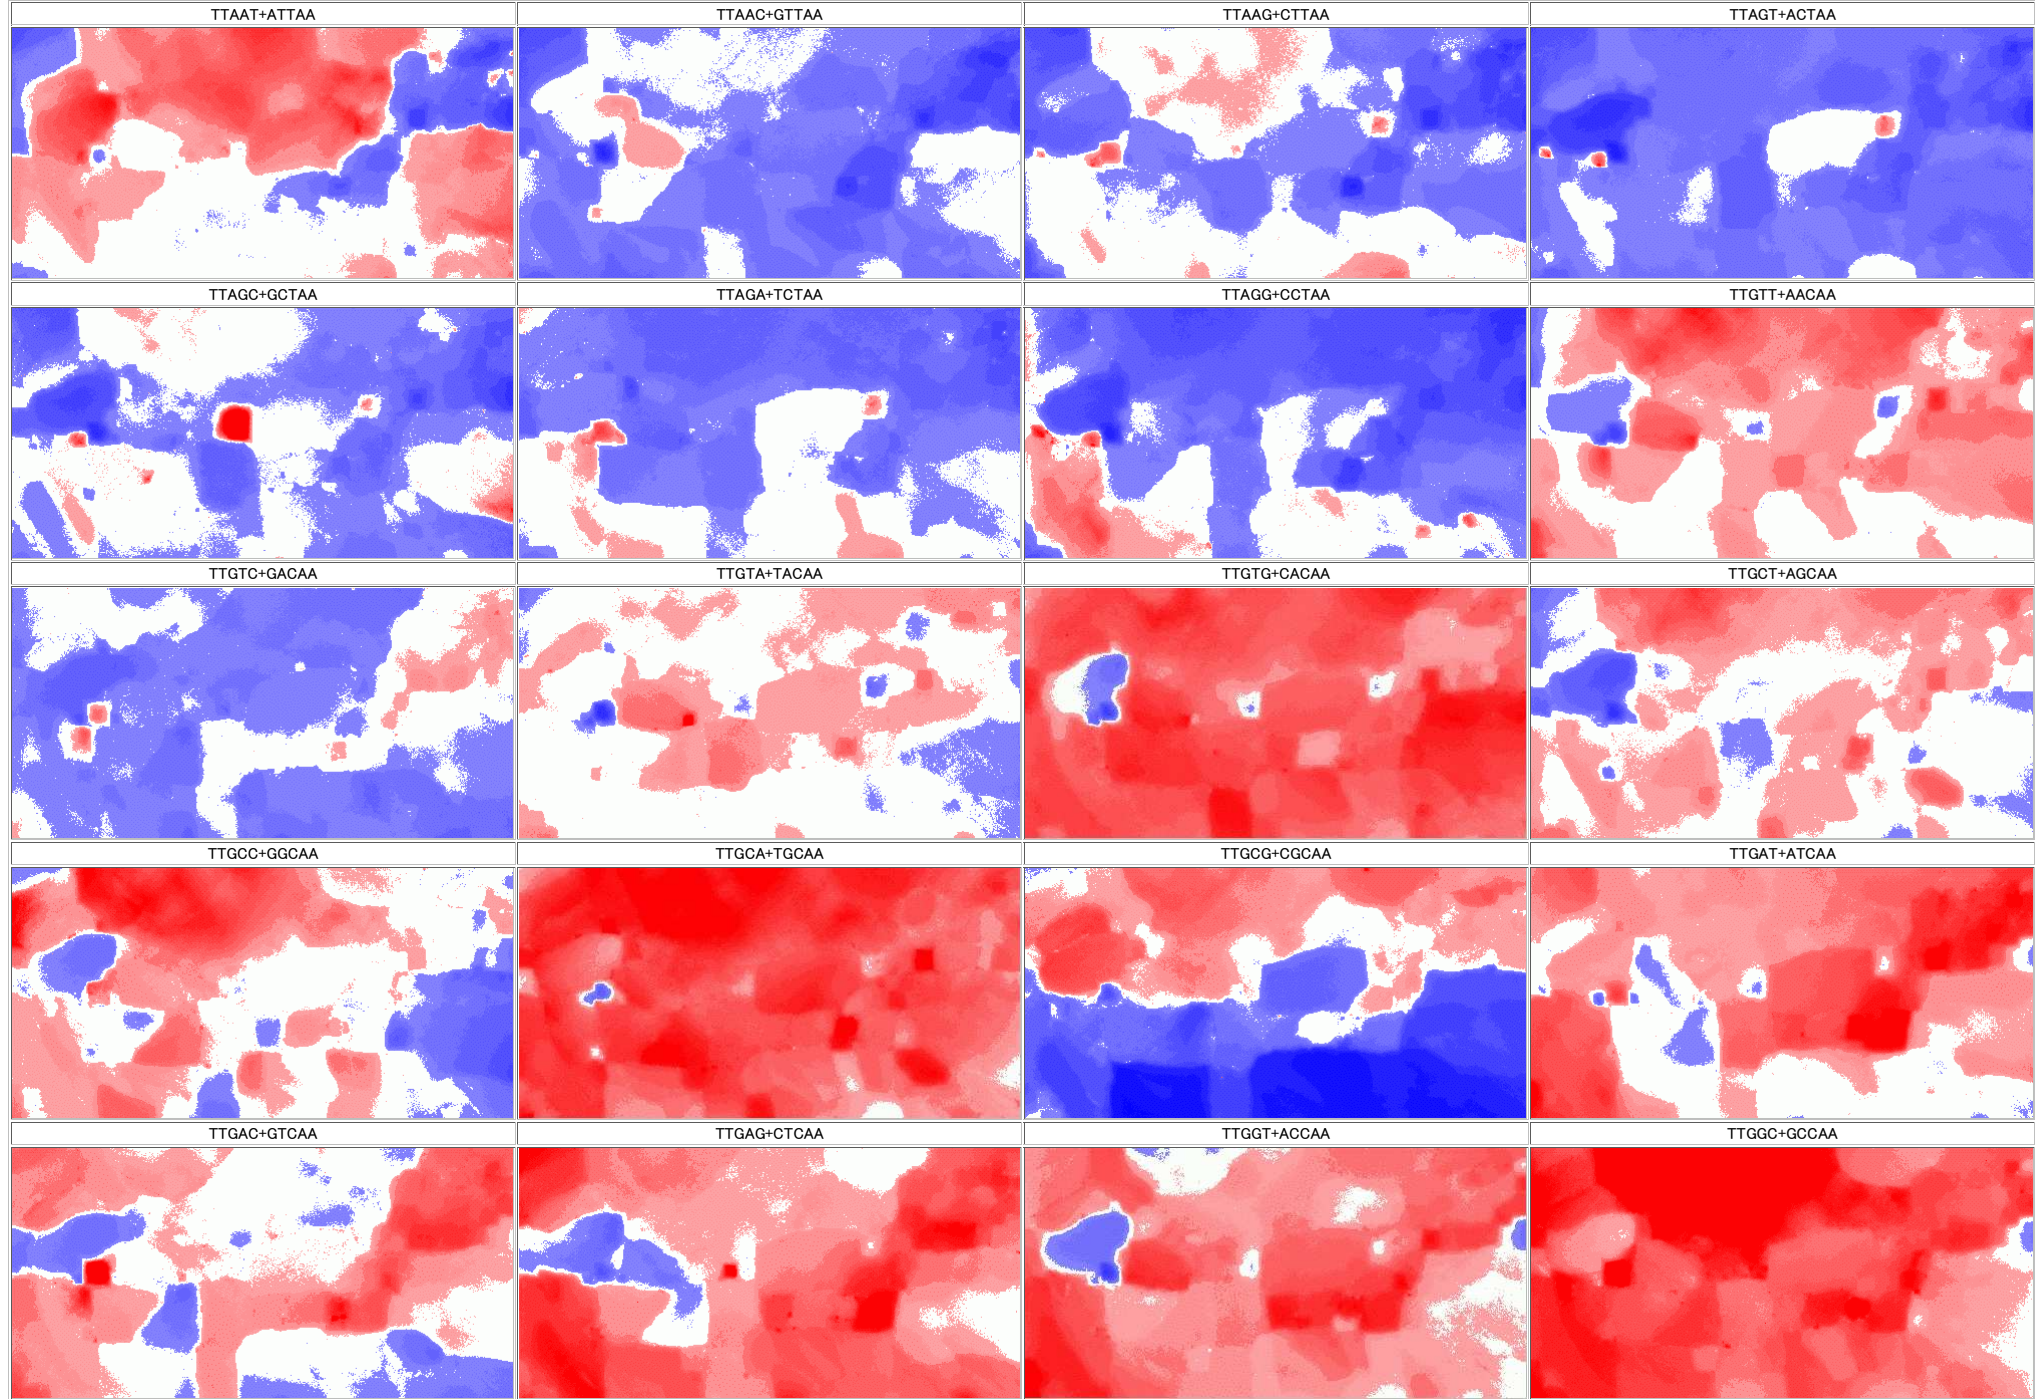

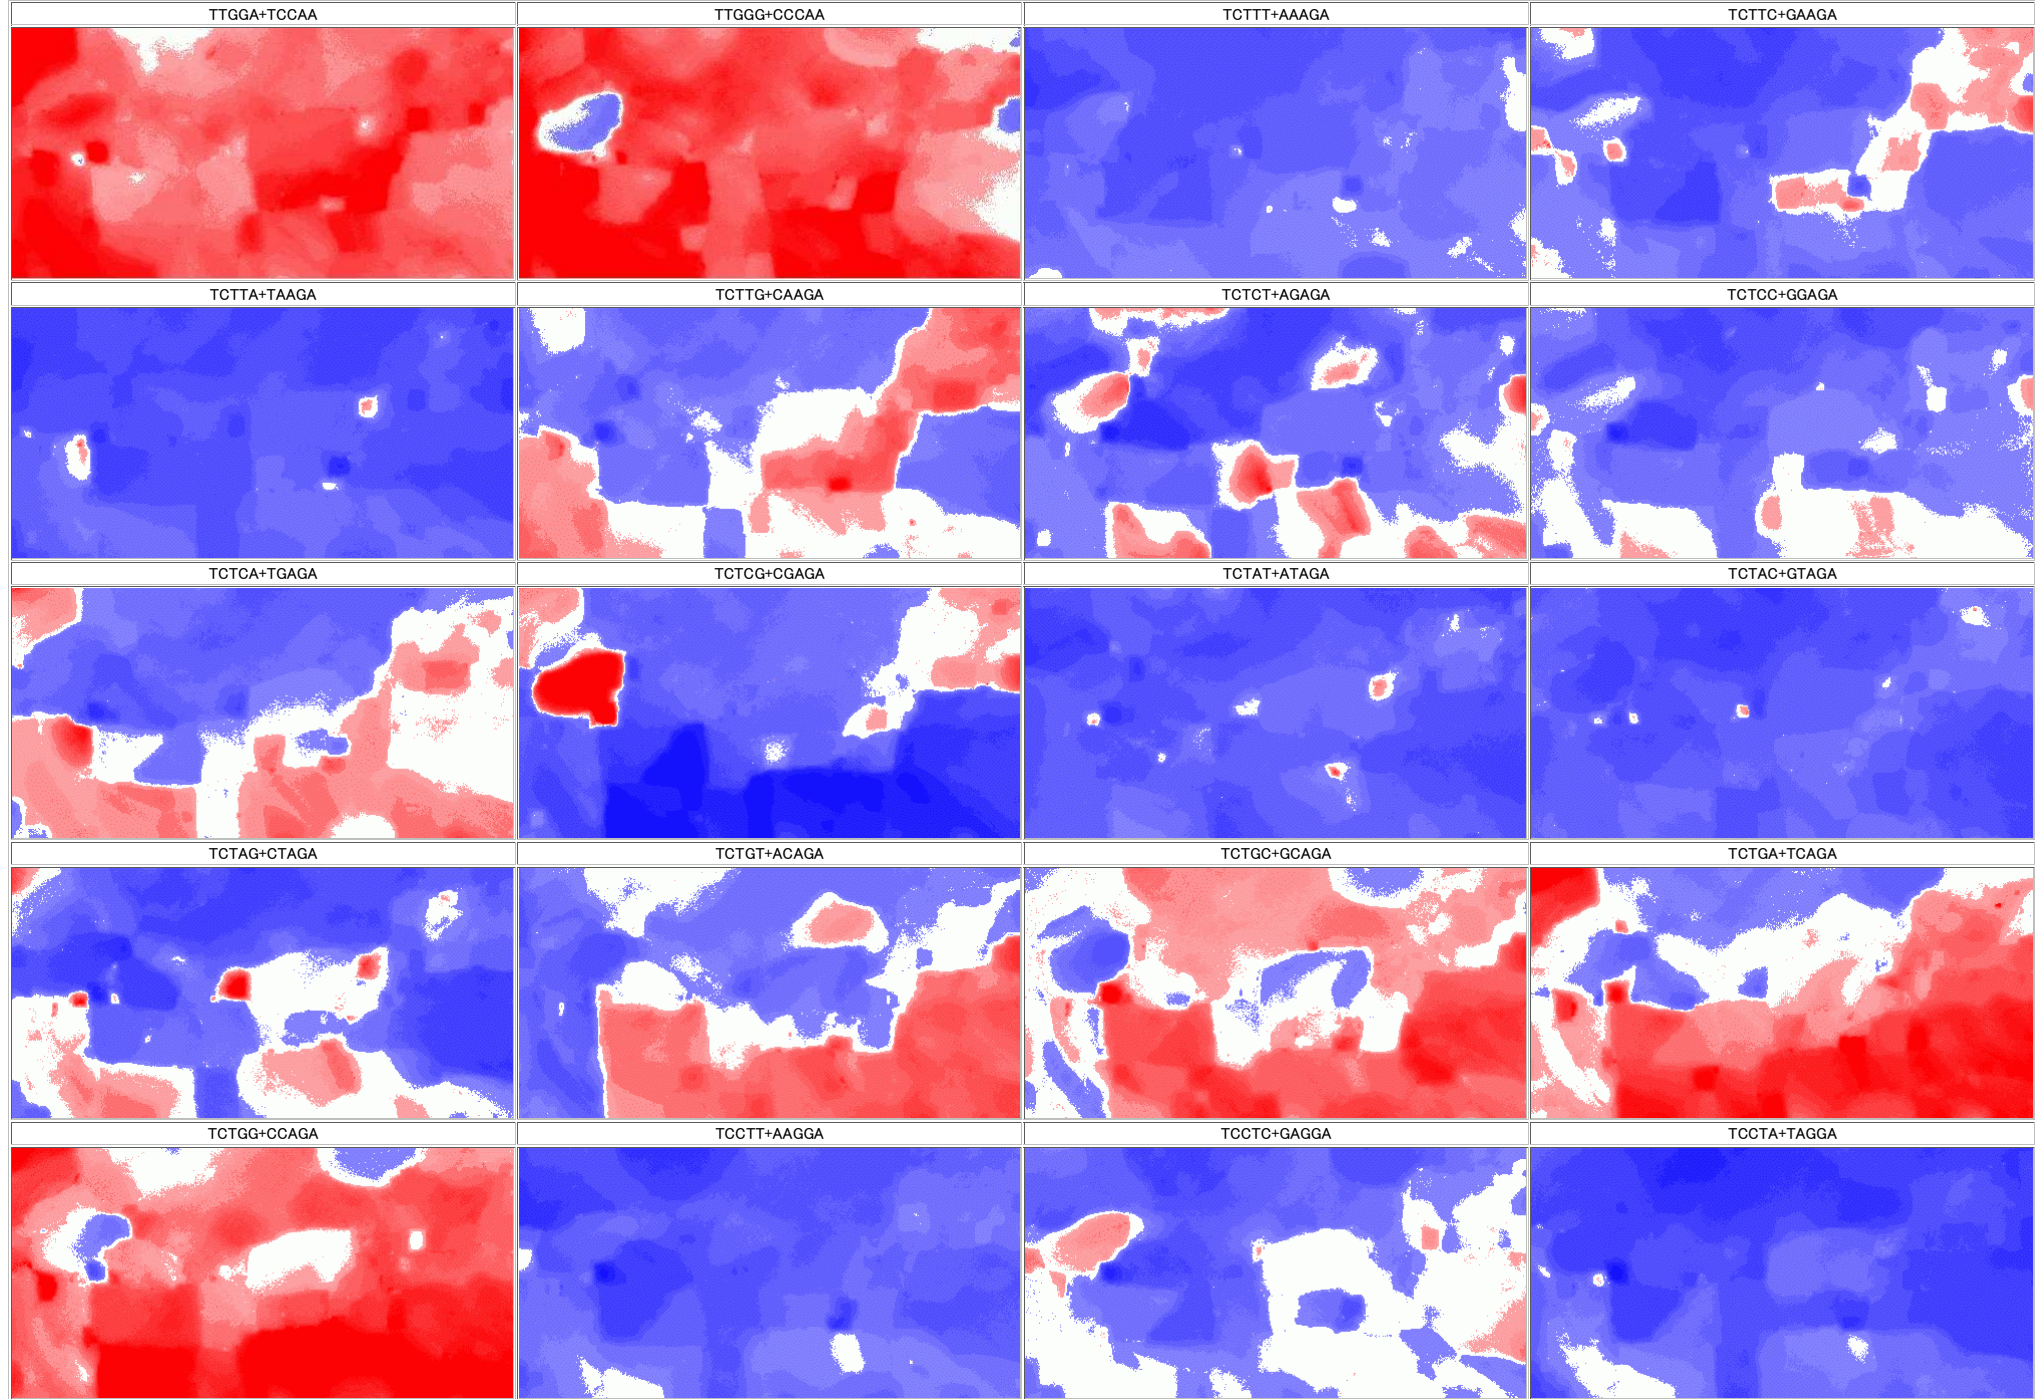

Supplementary Figure S2

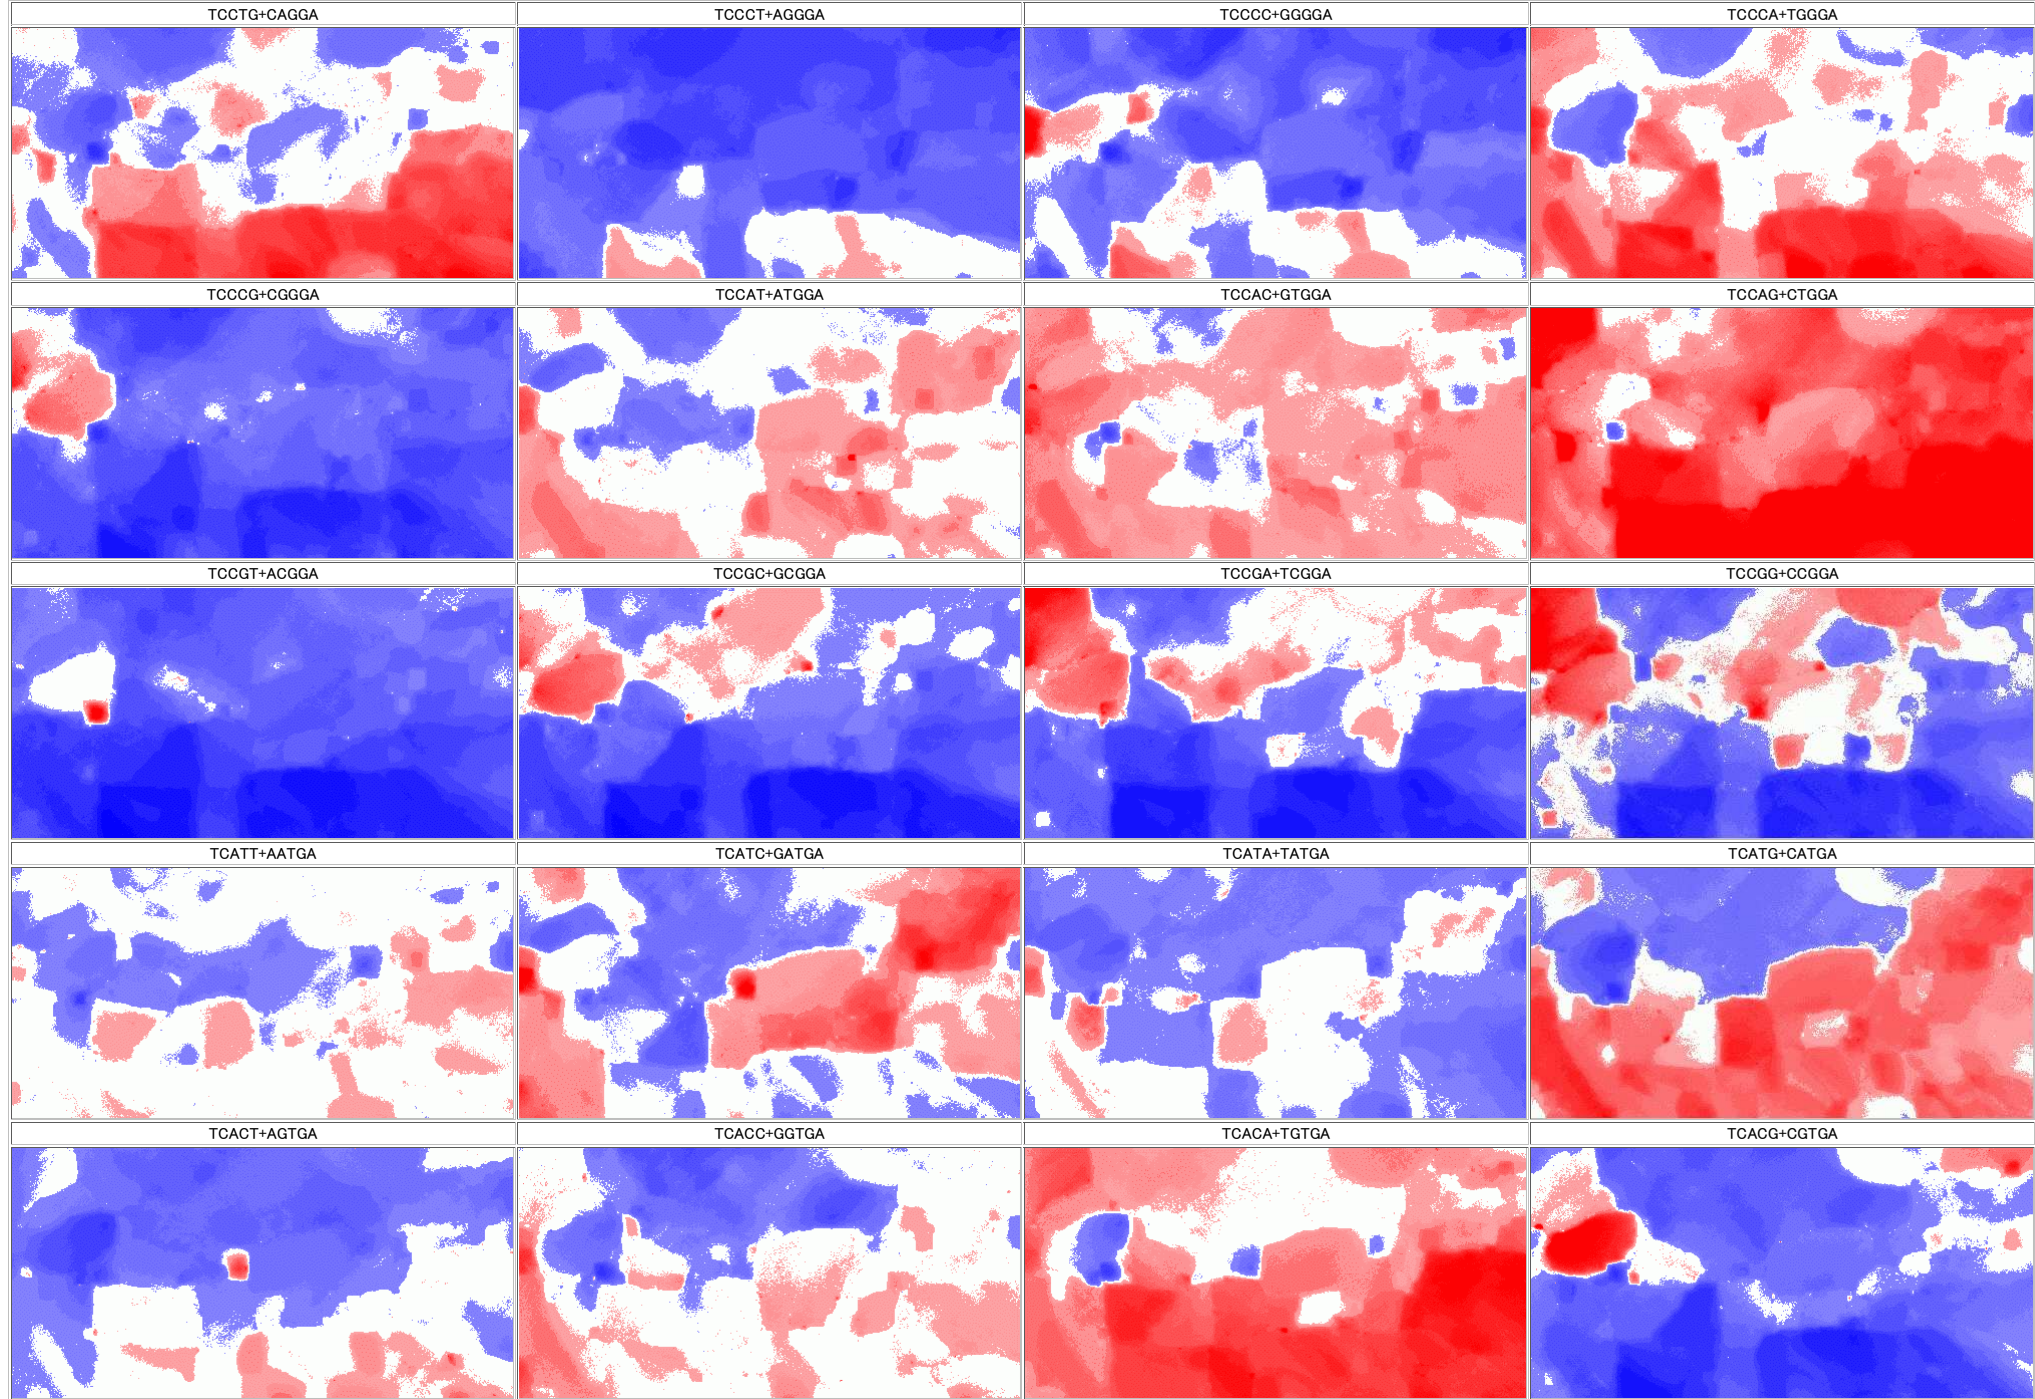

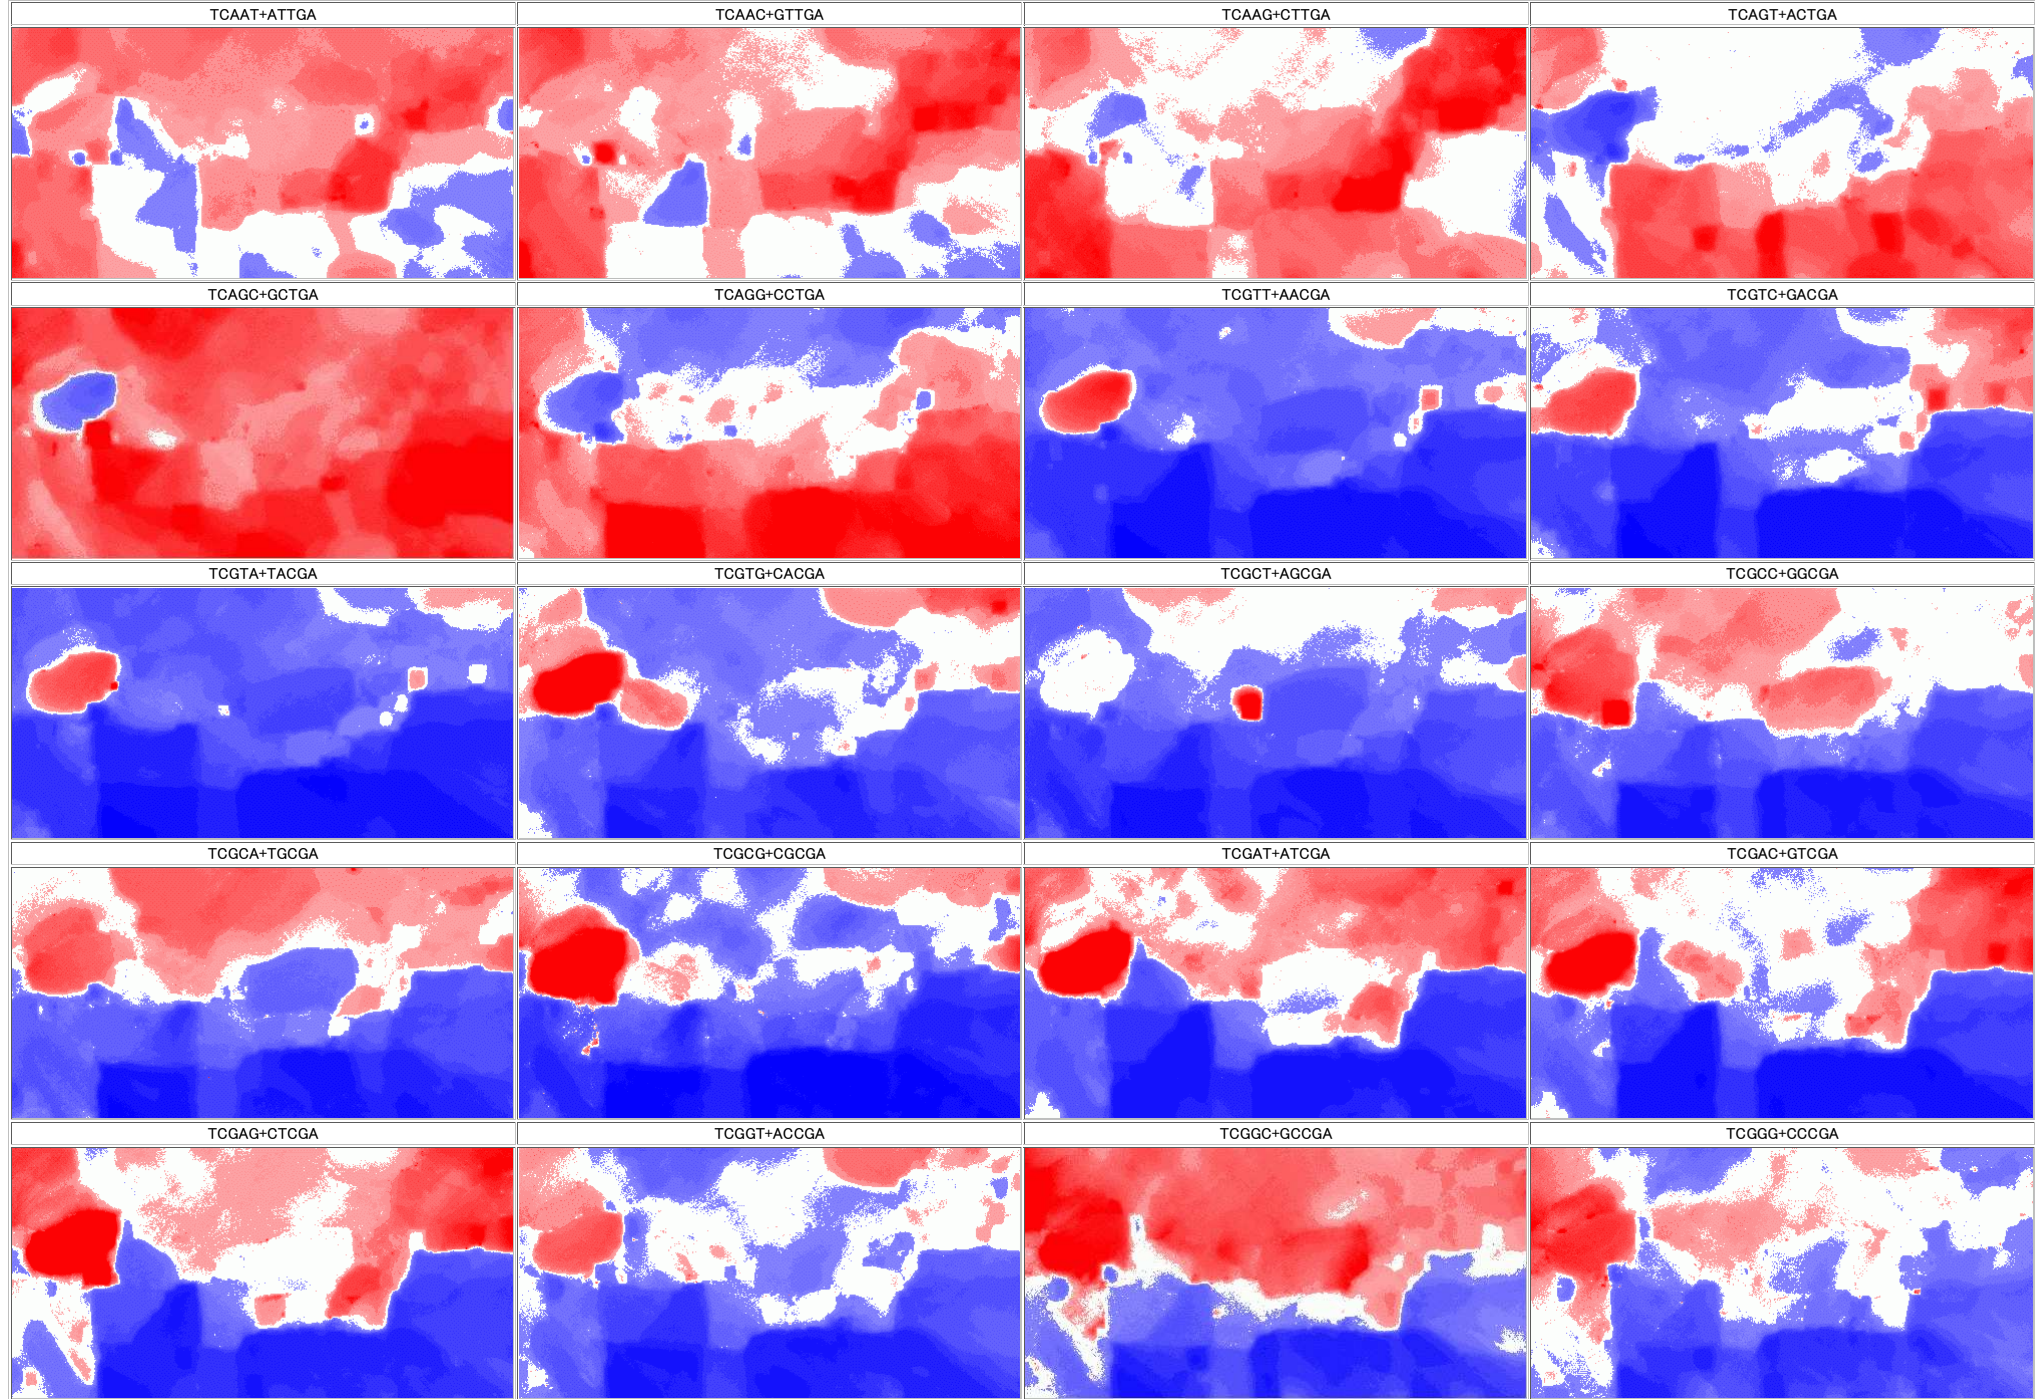

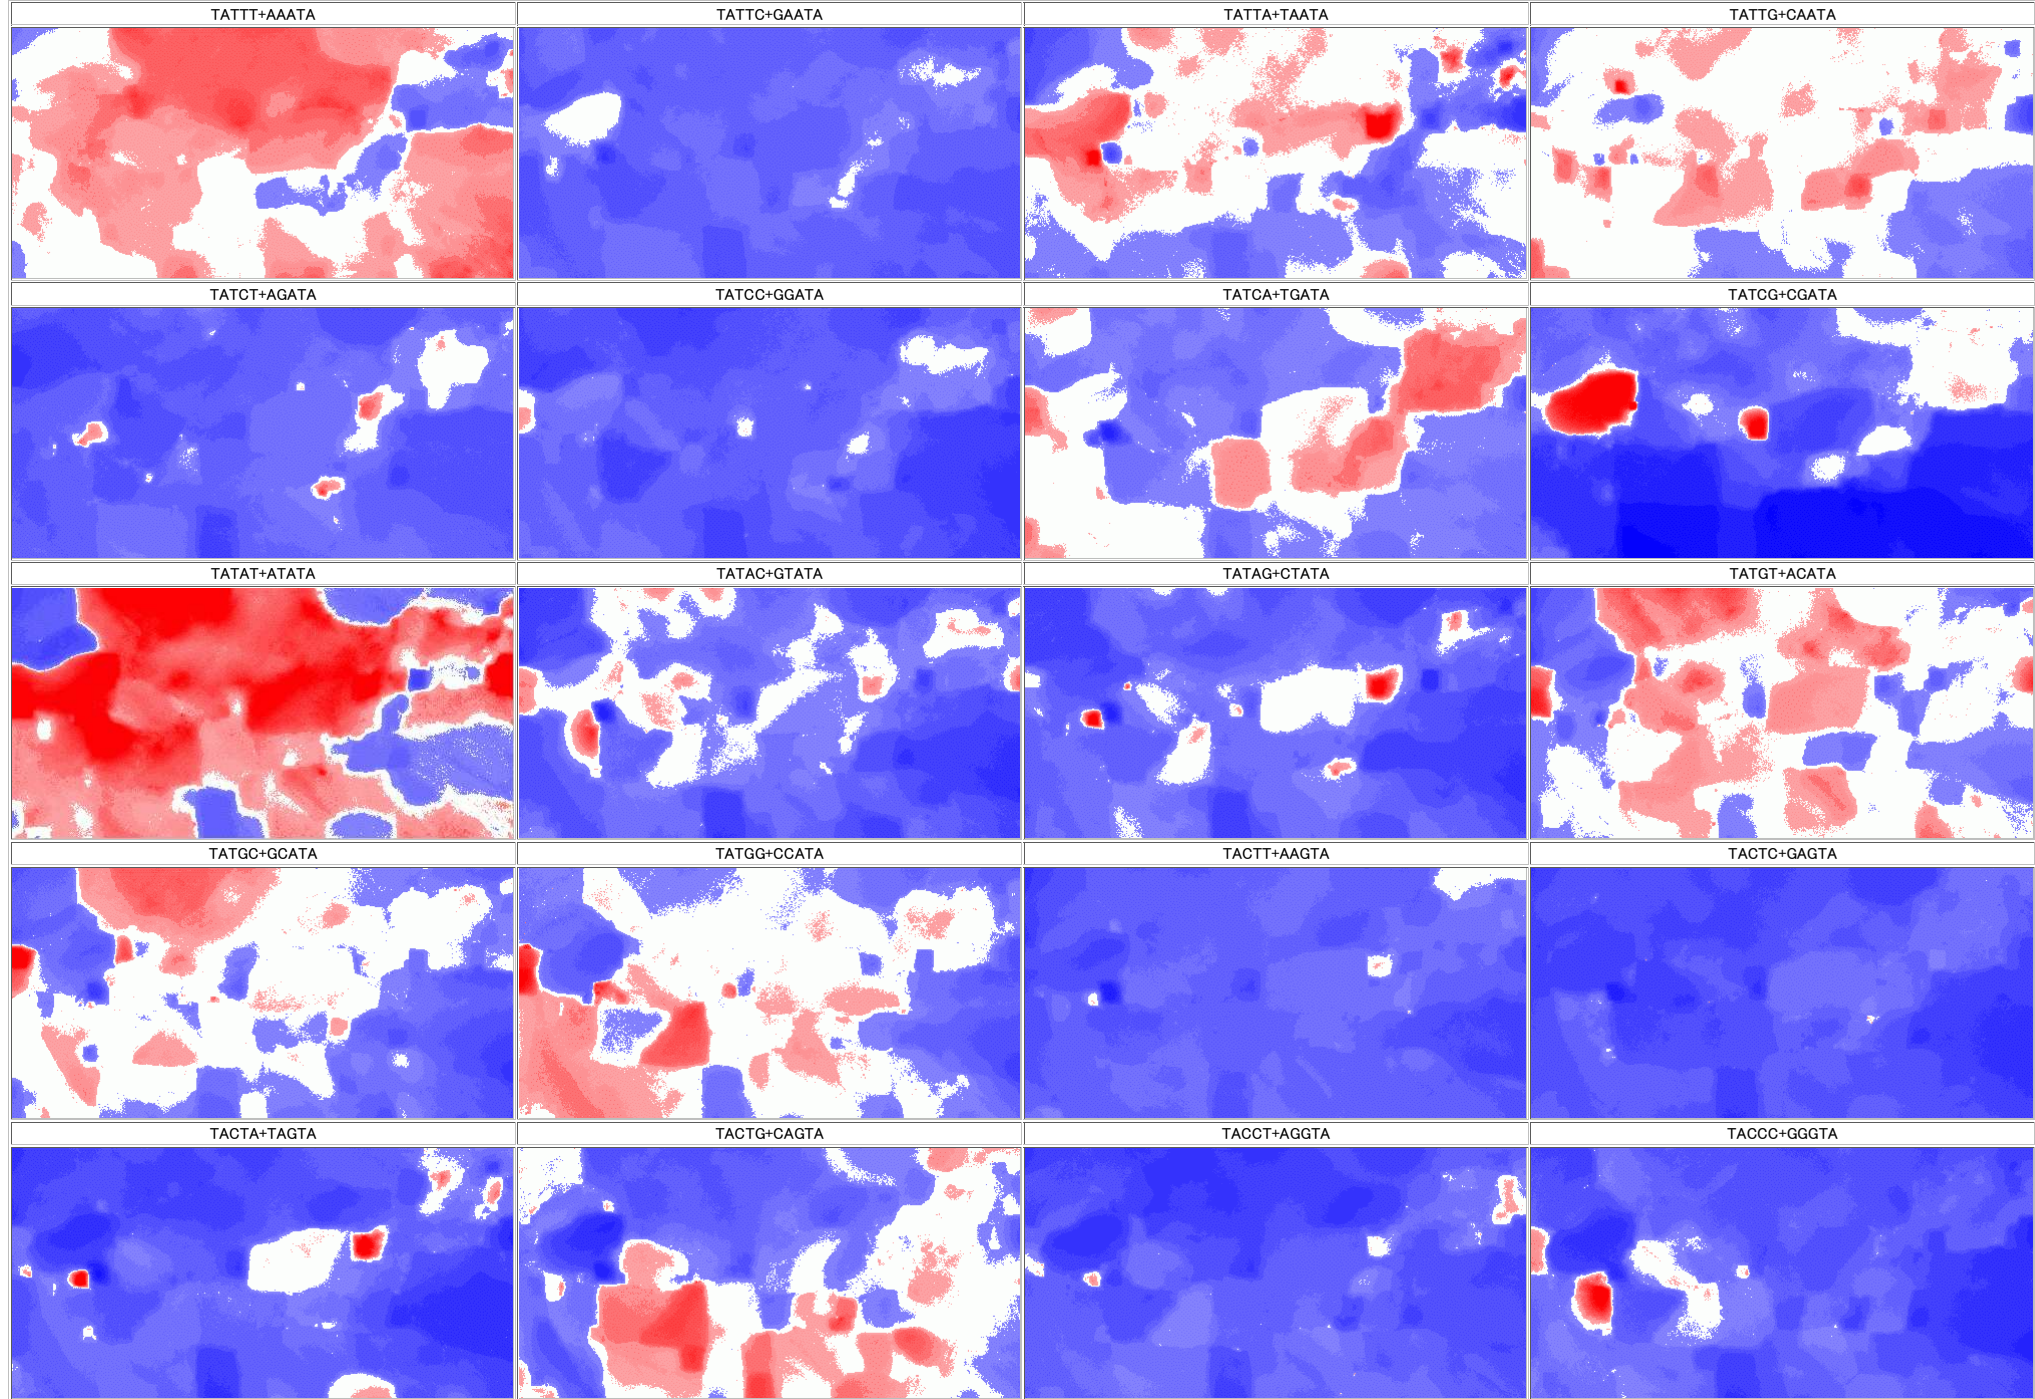

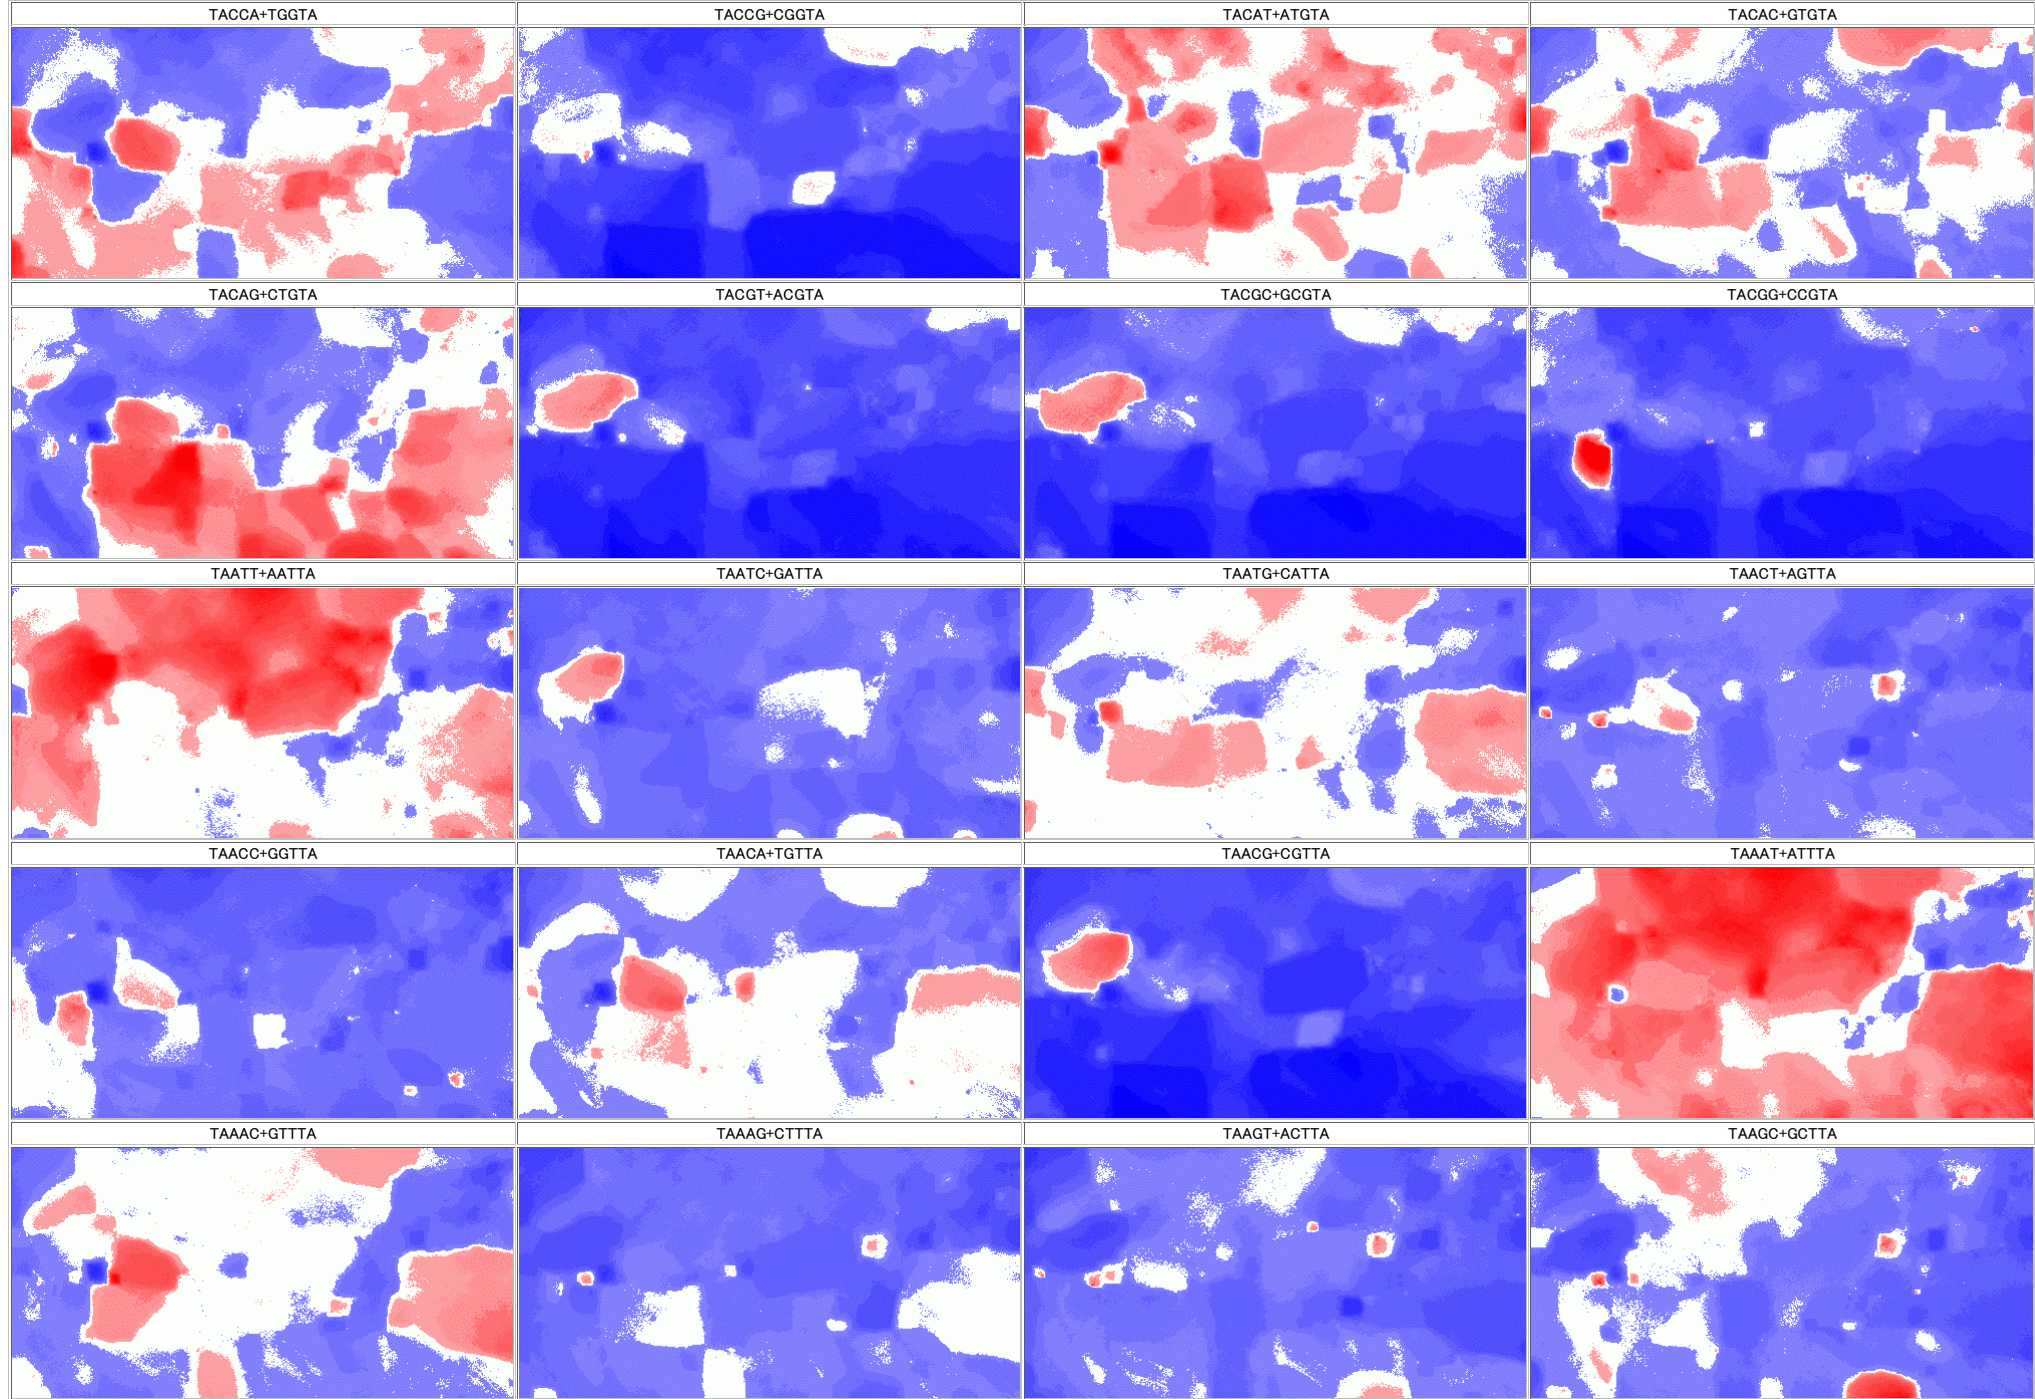

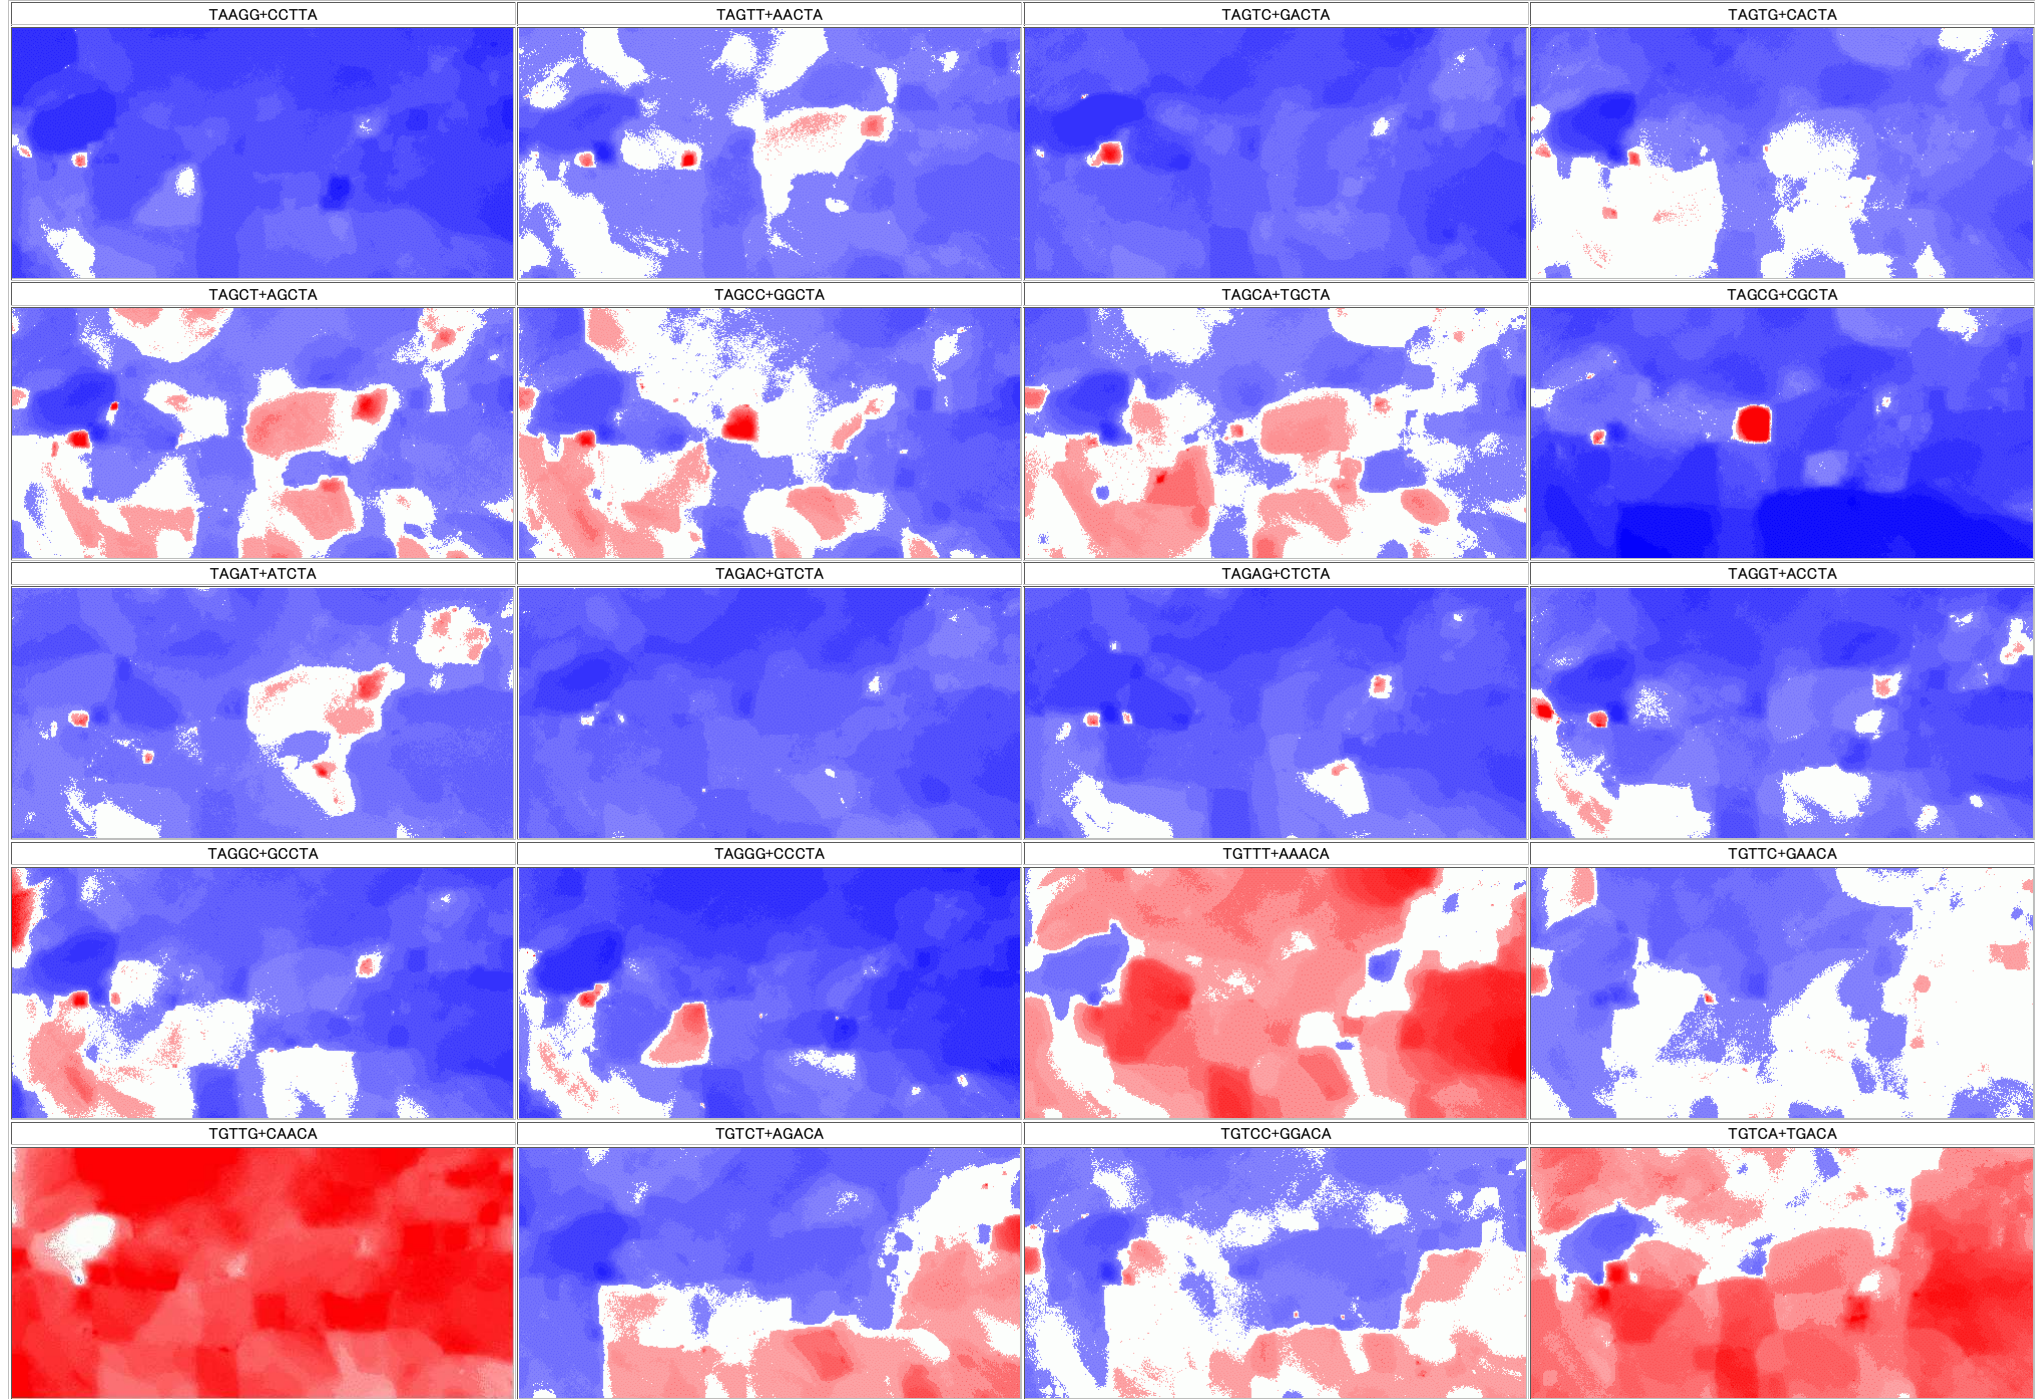



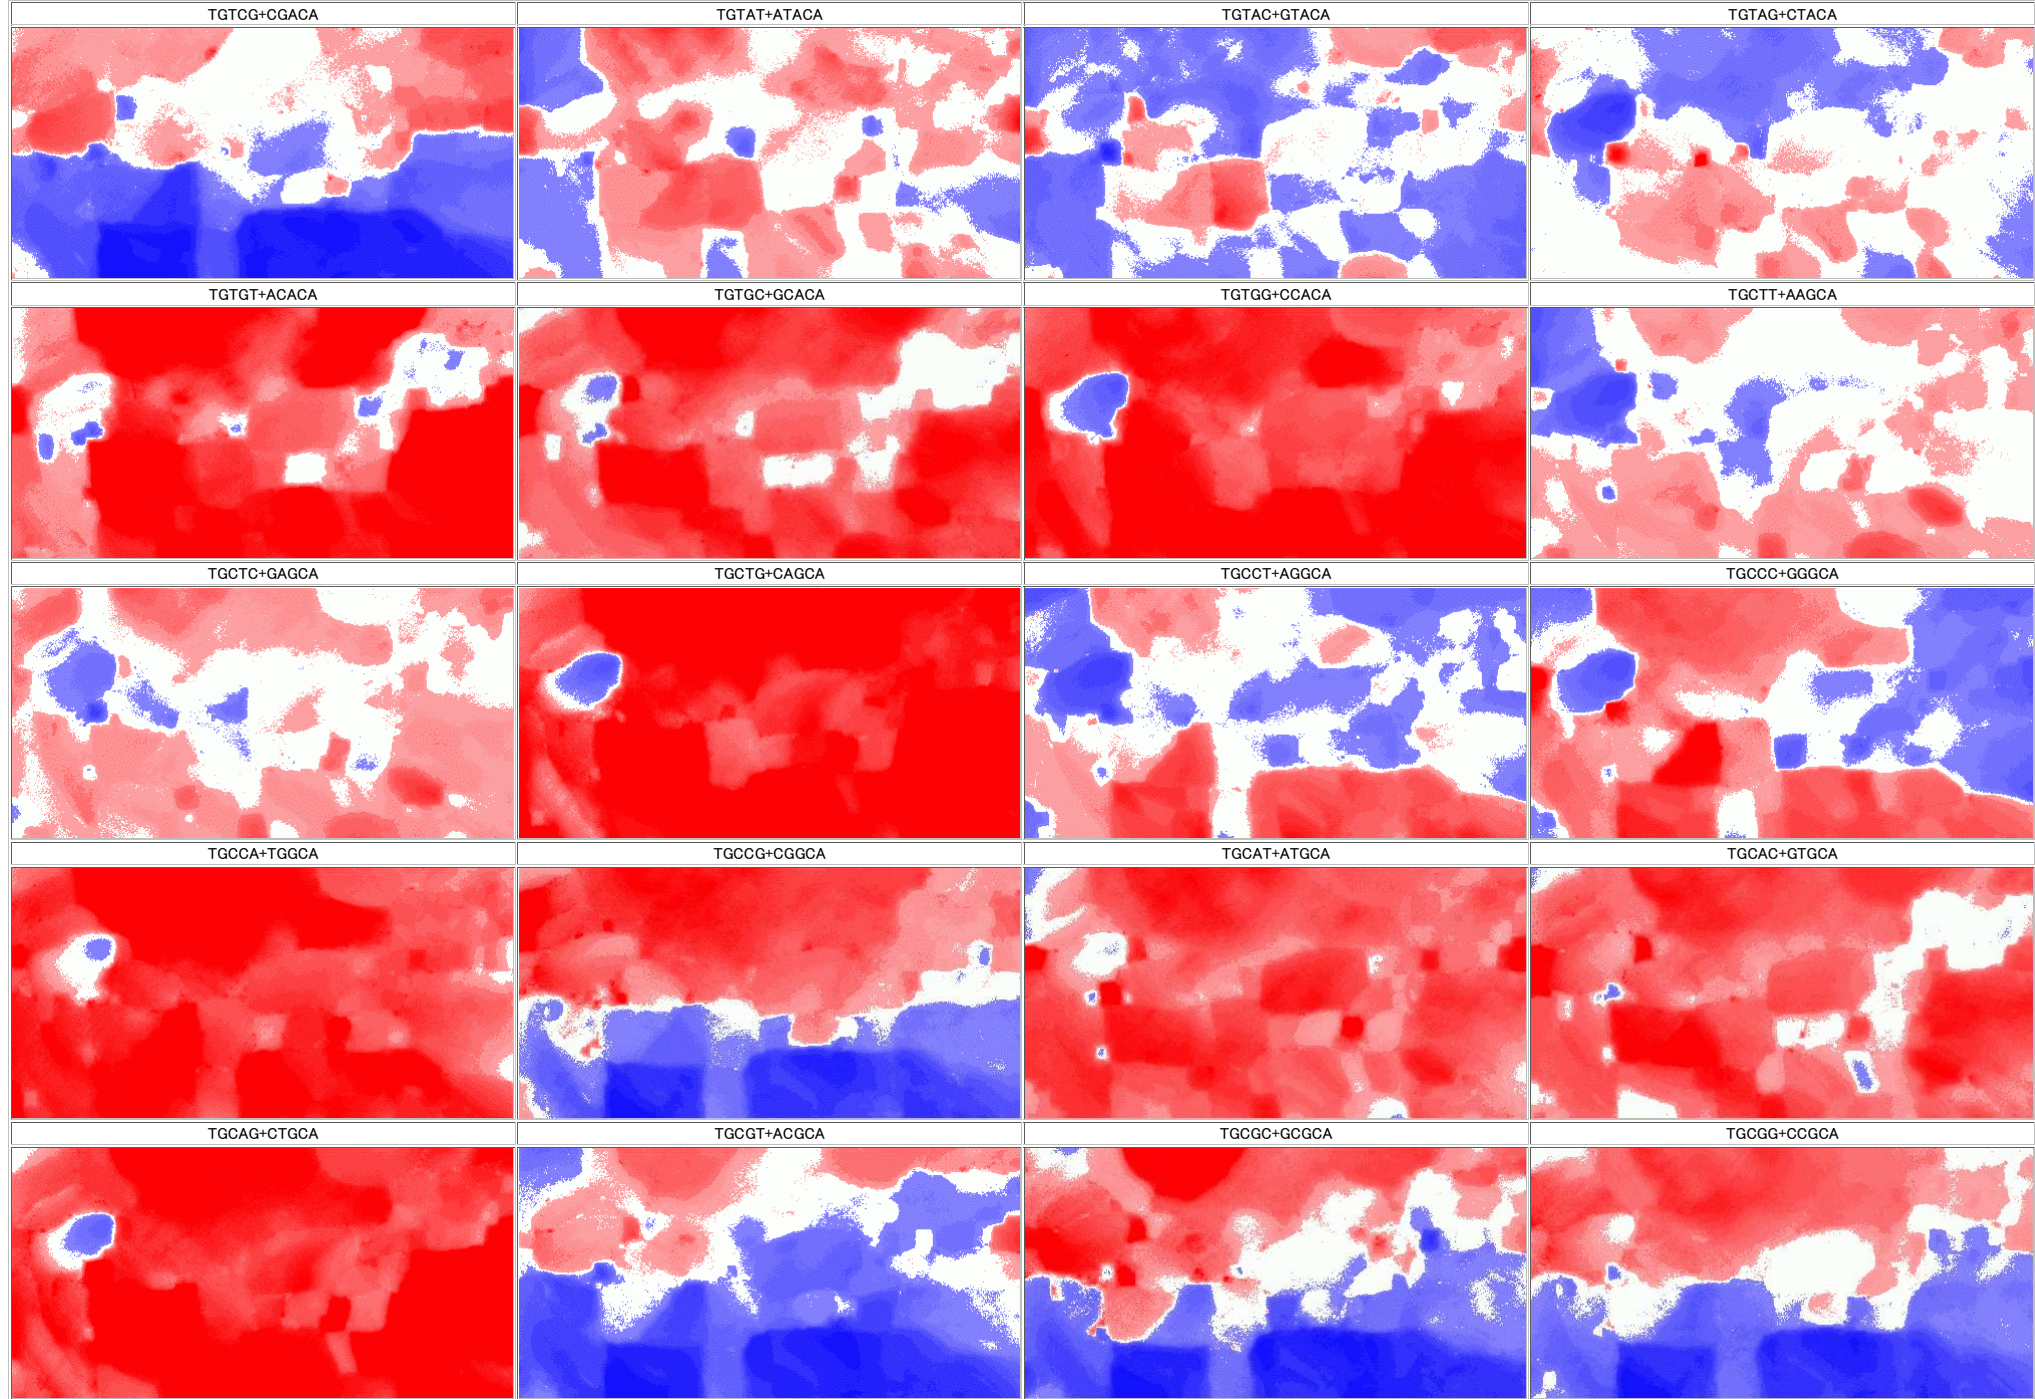

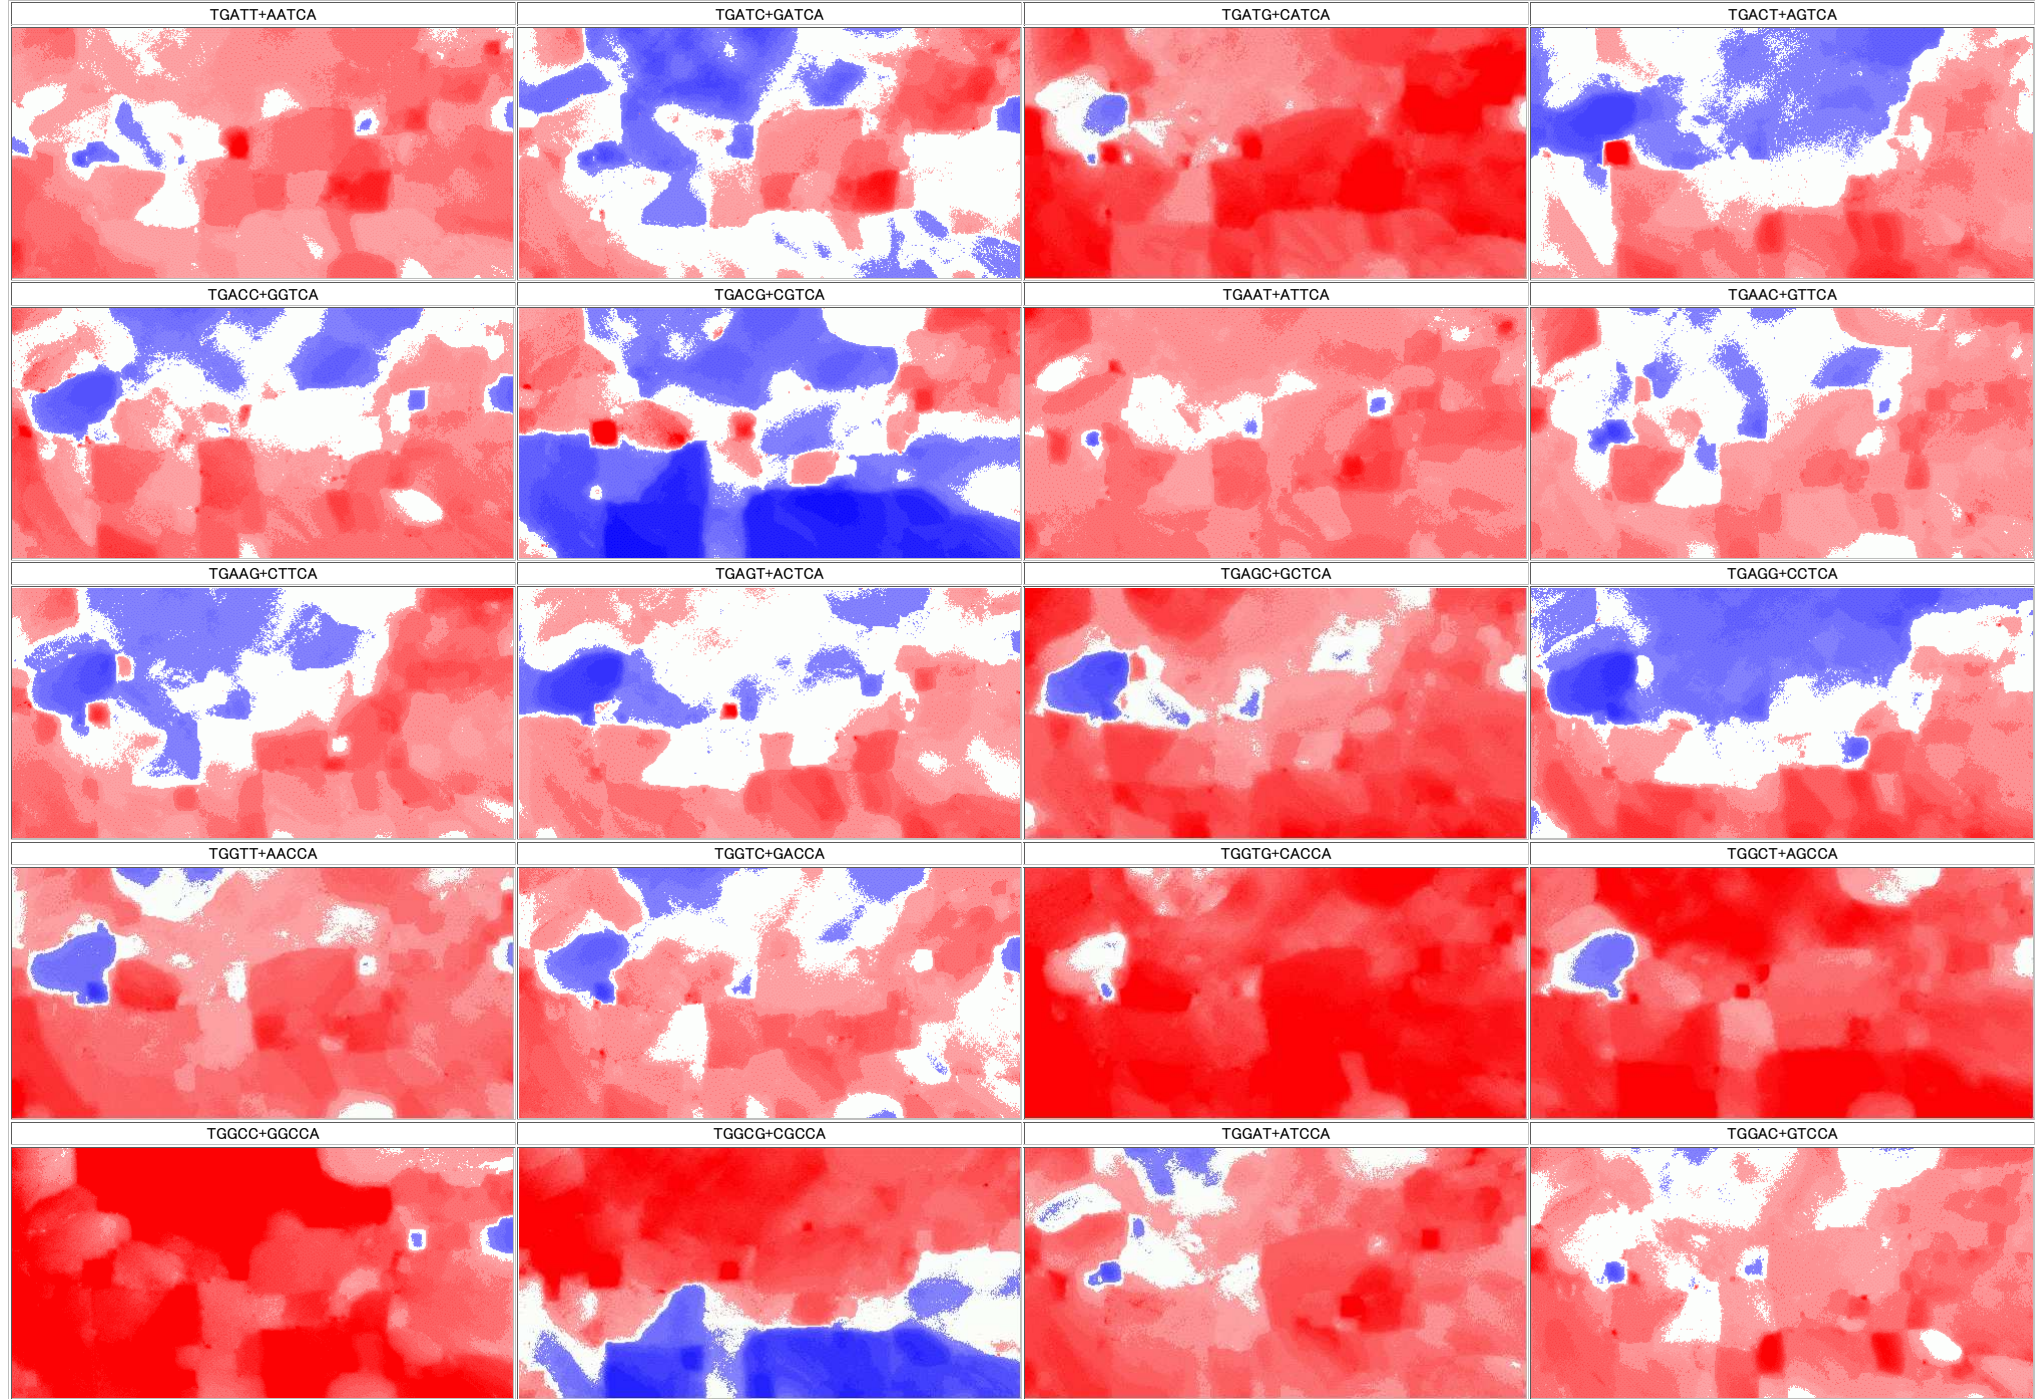

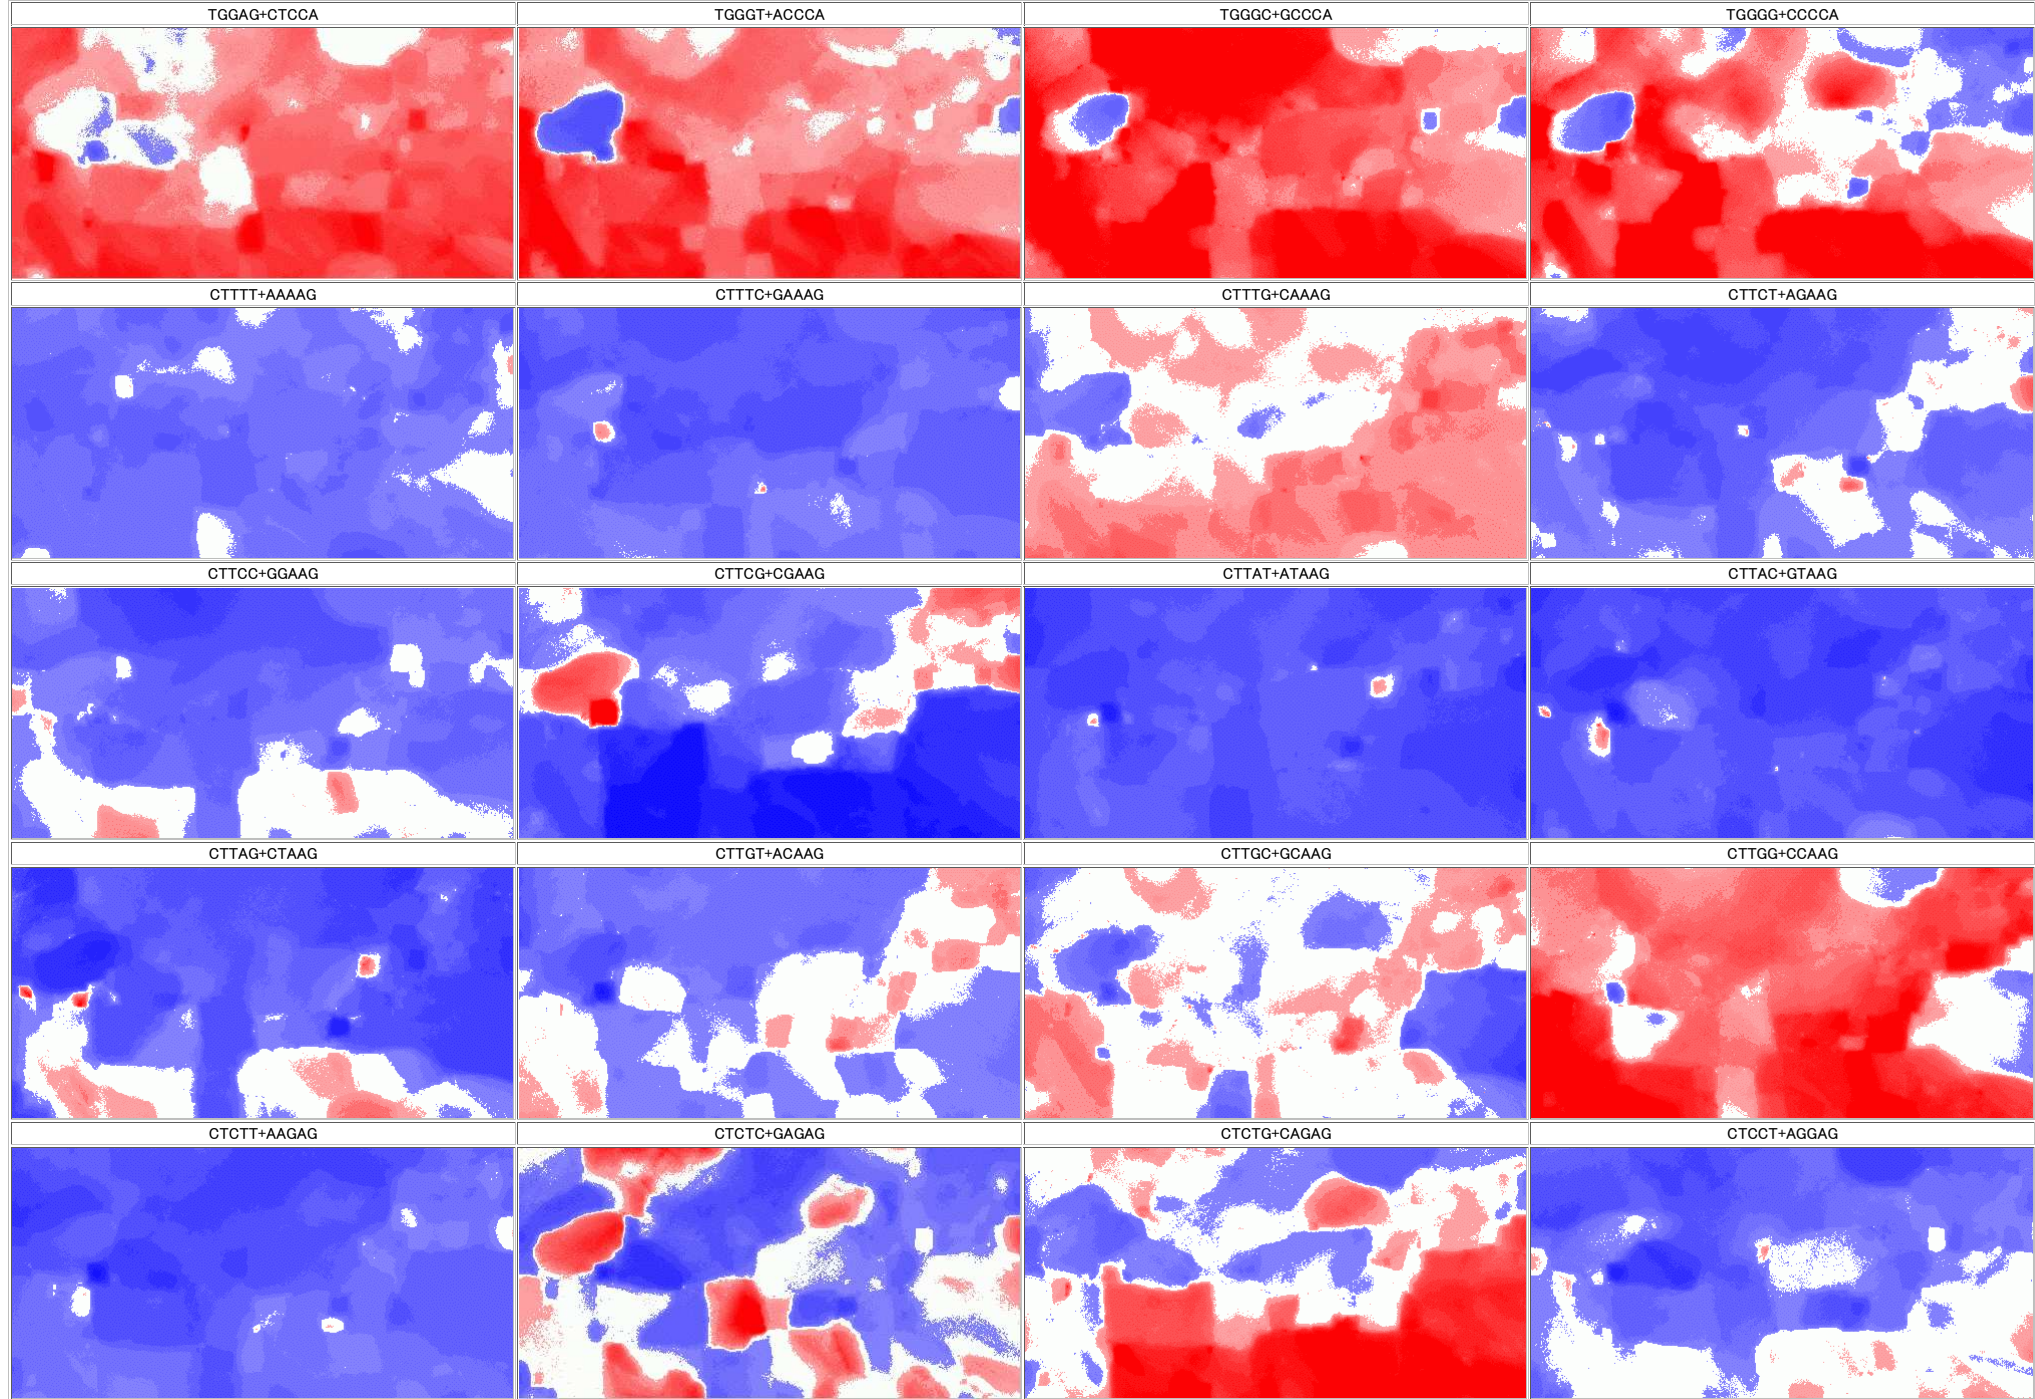

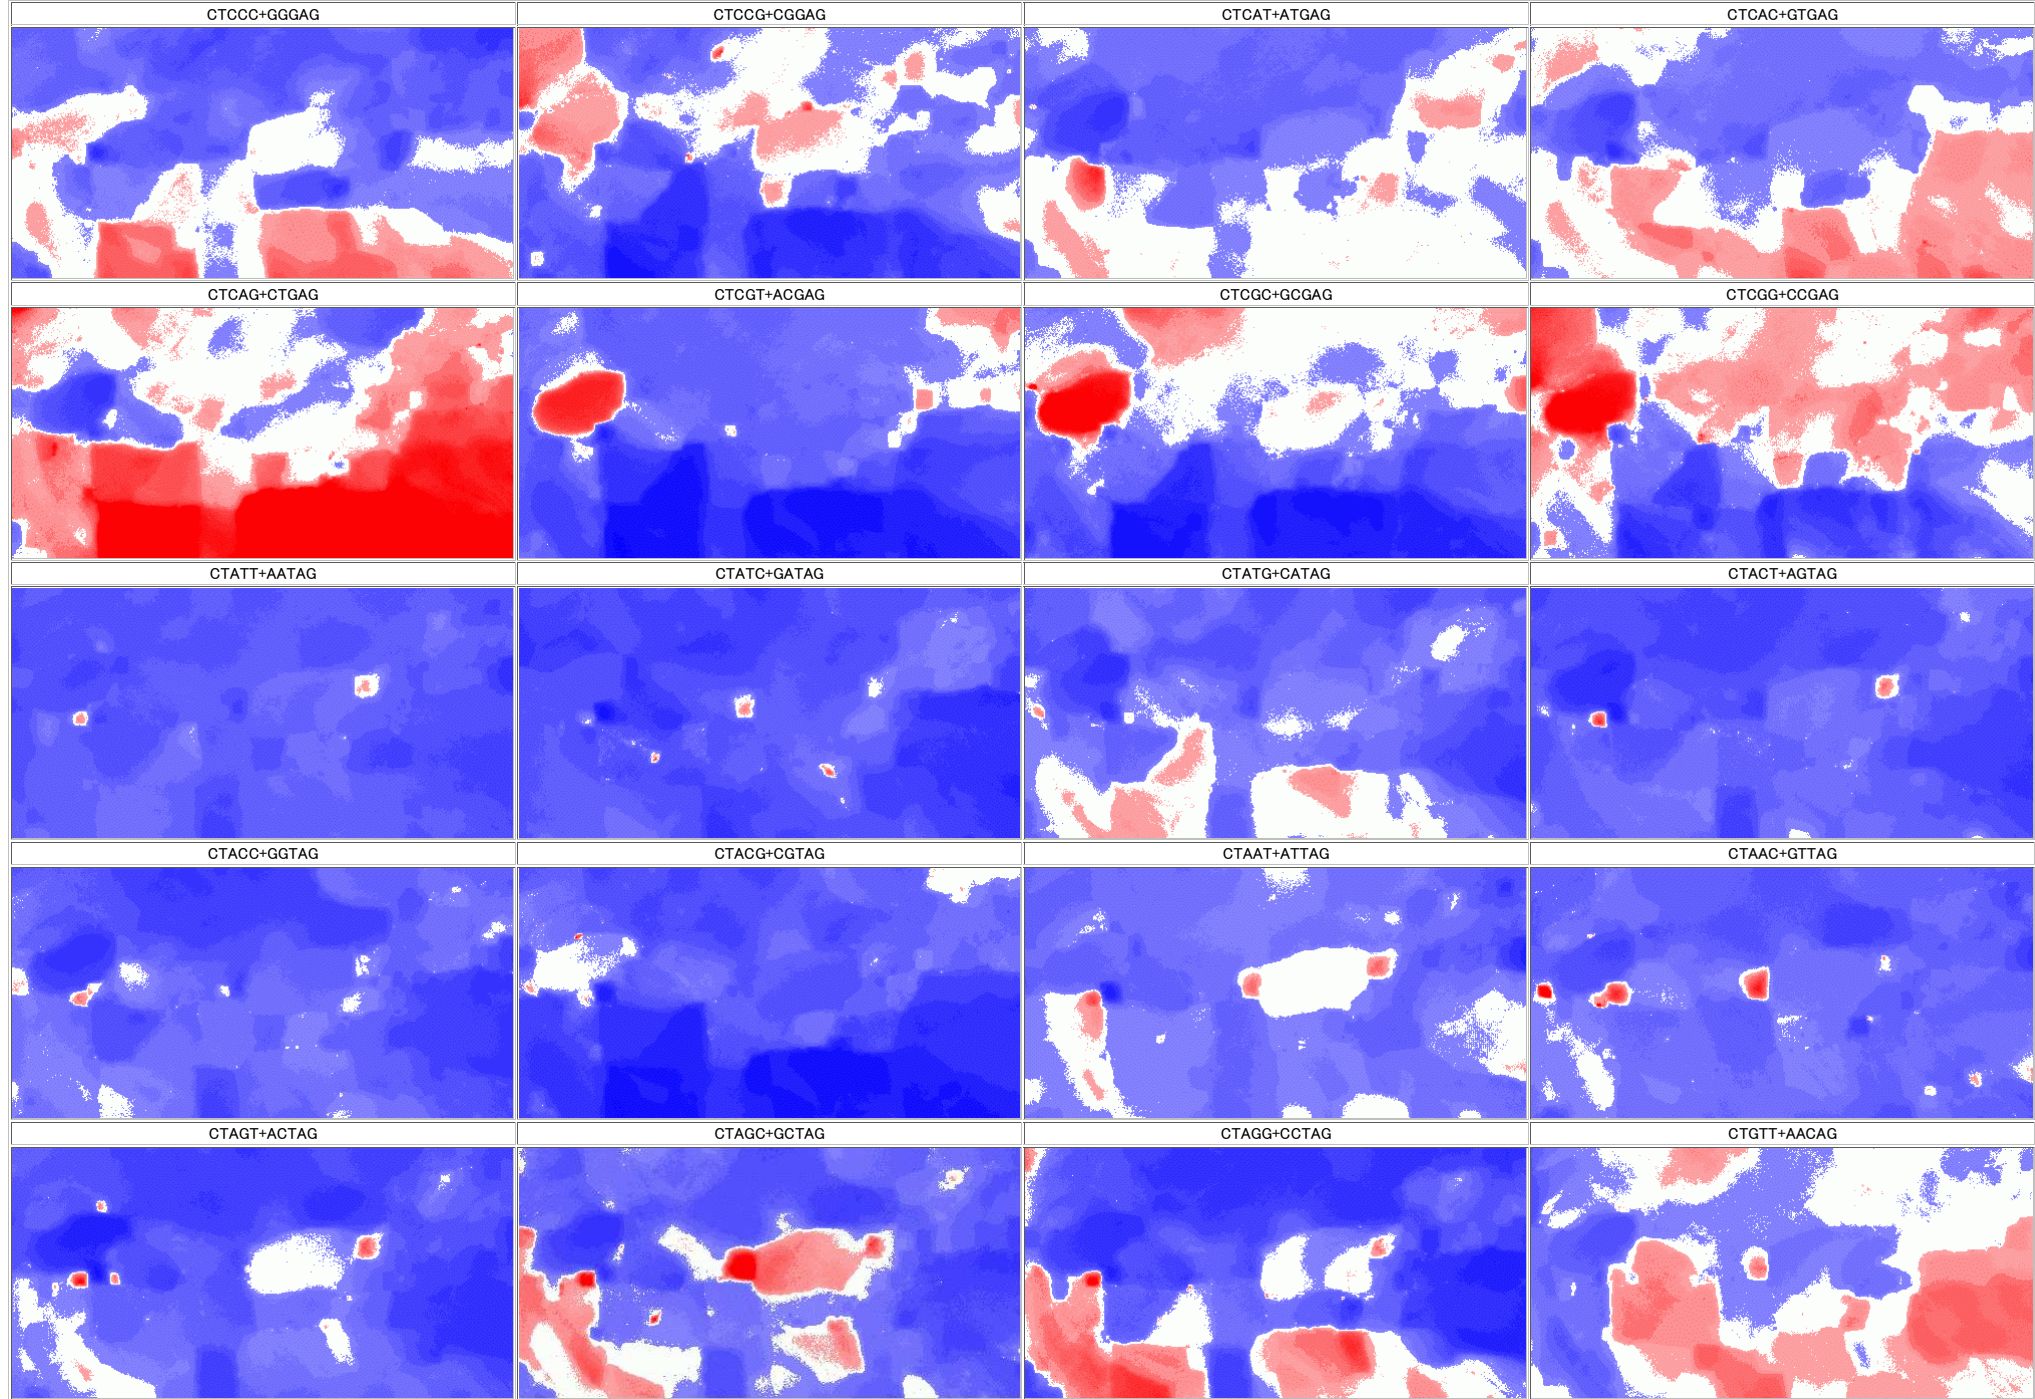

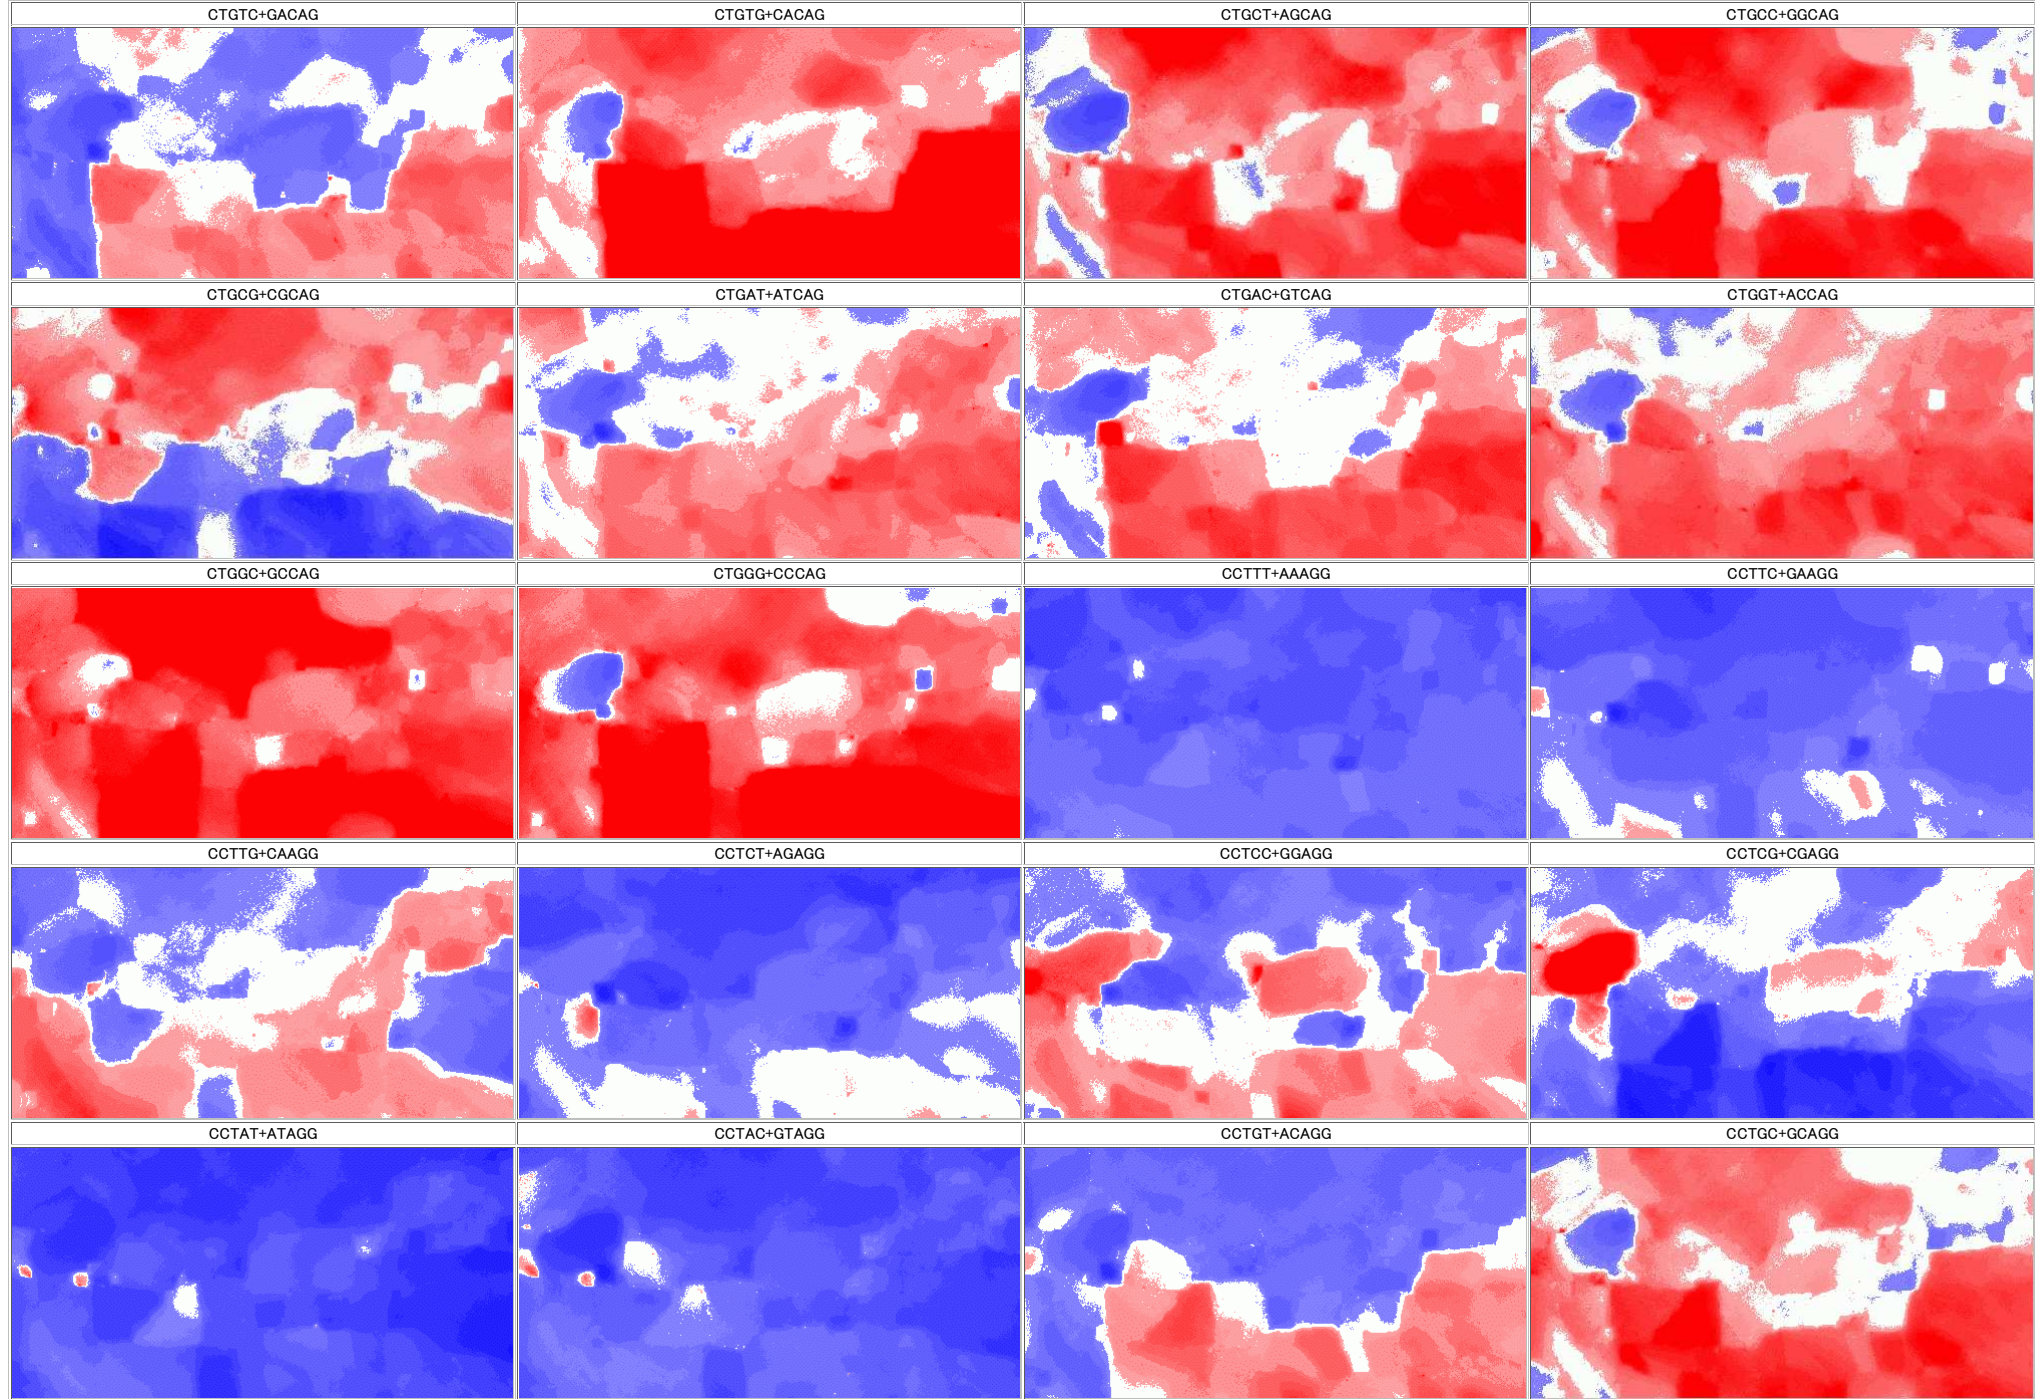

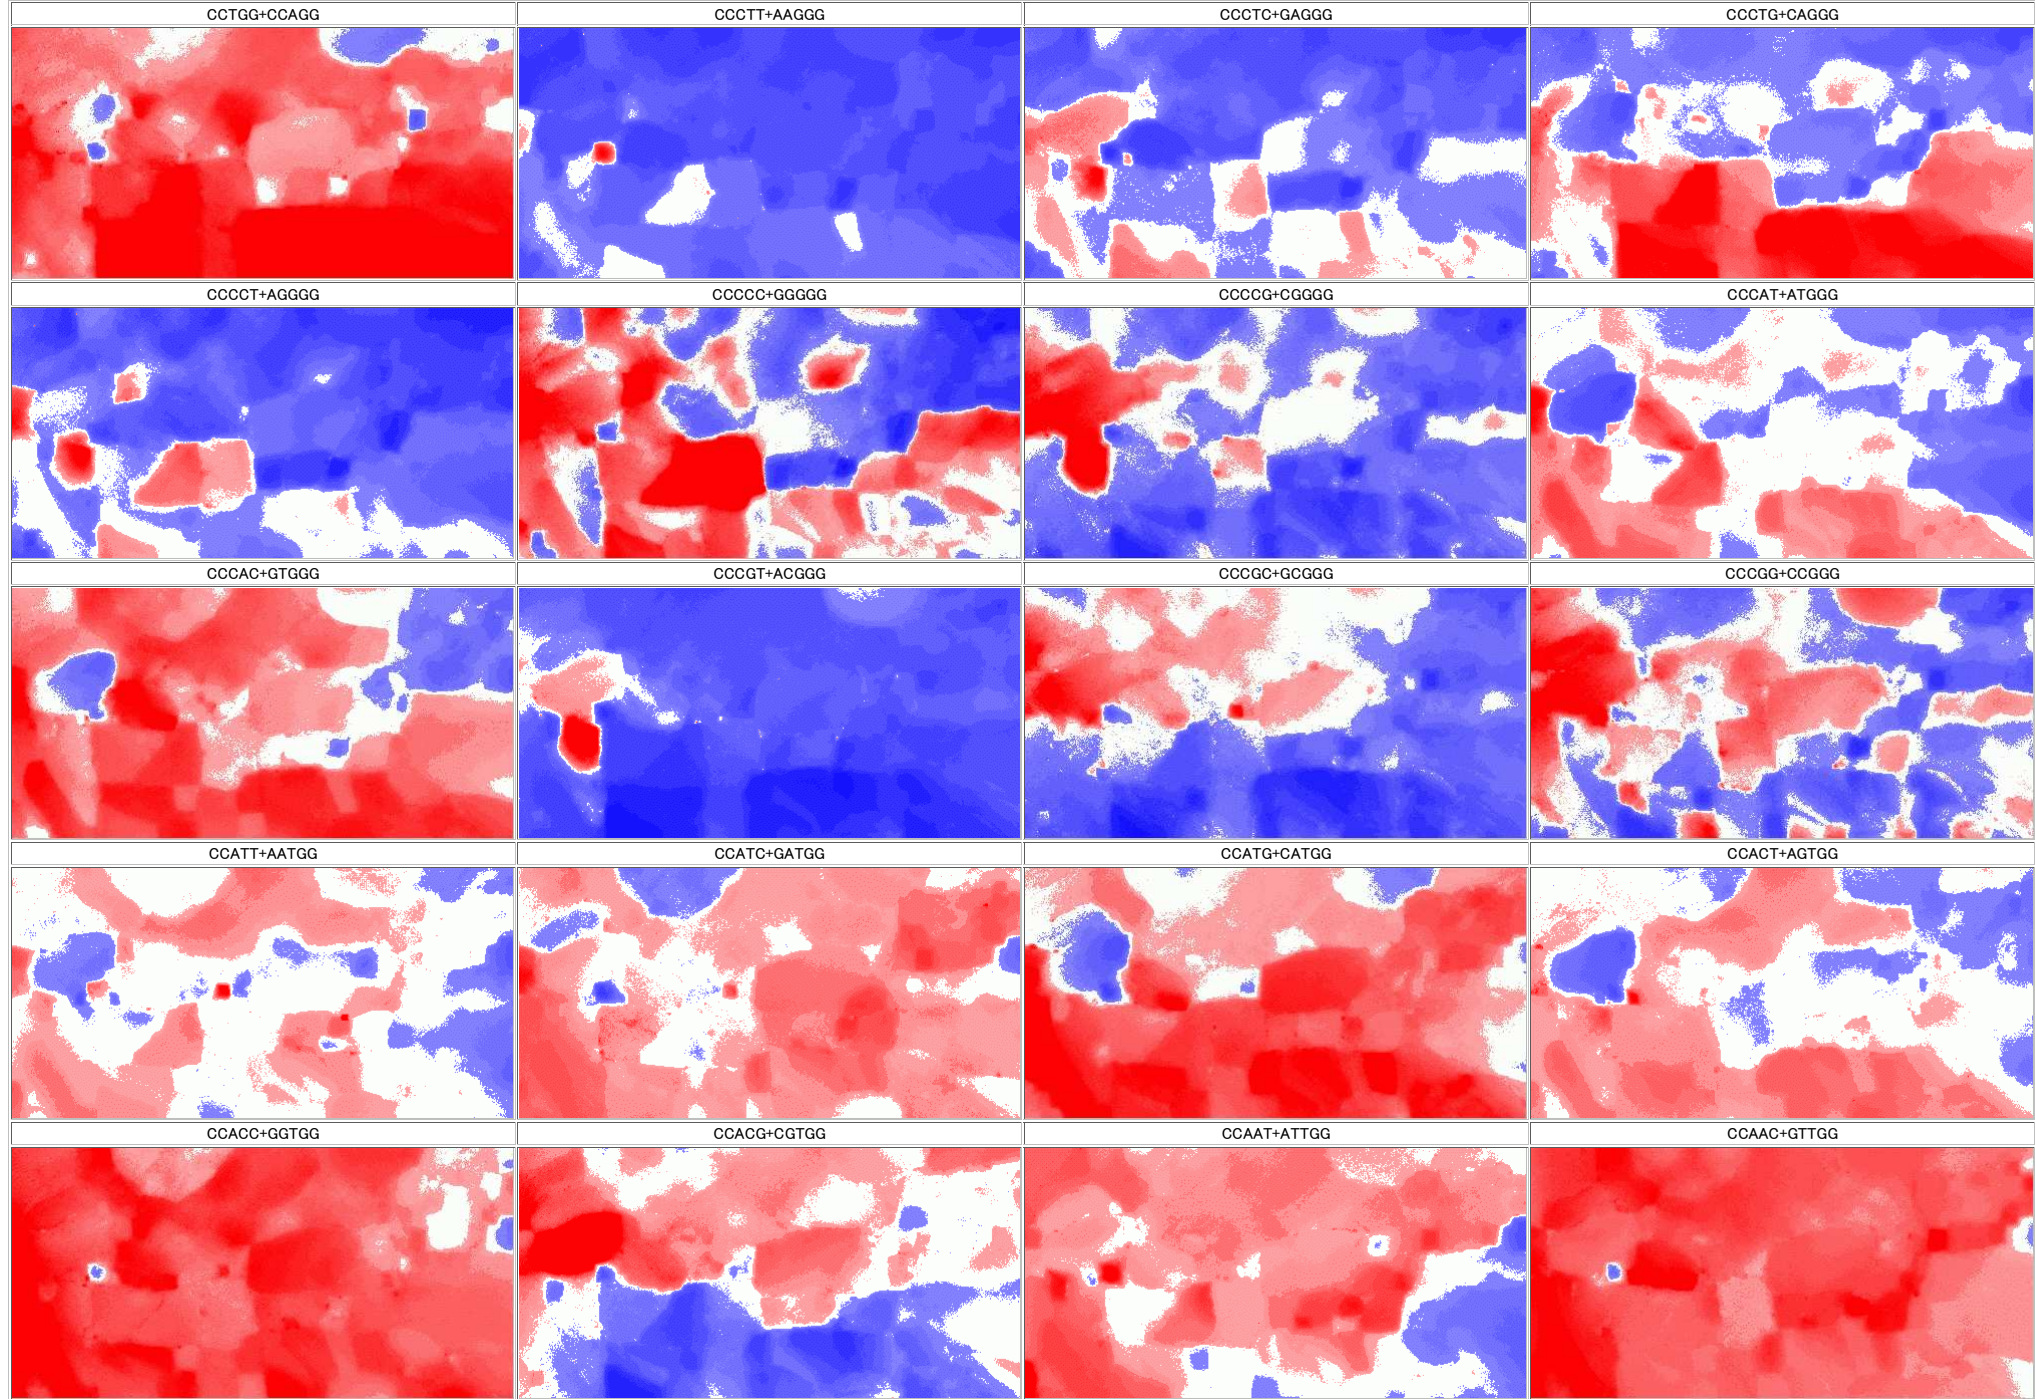

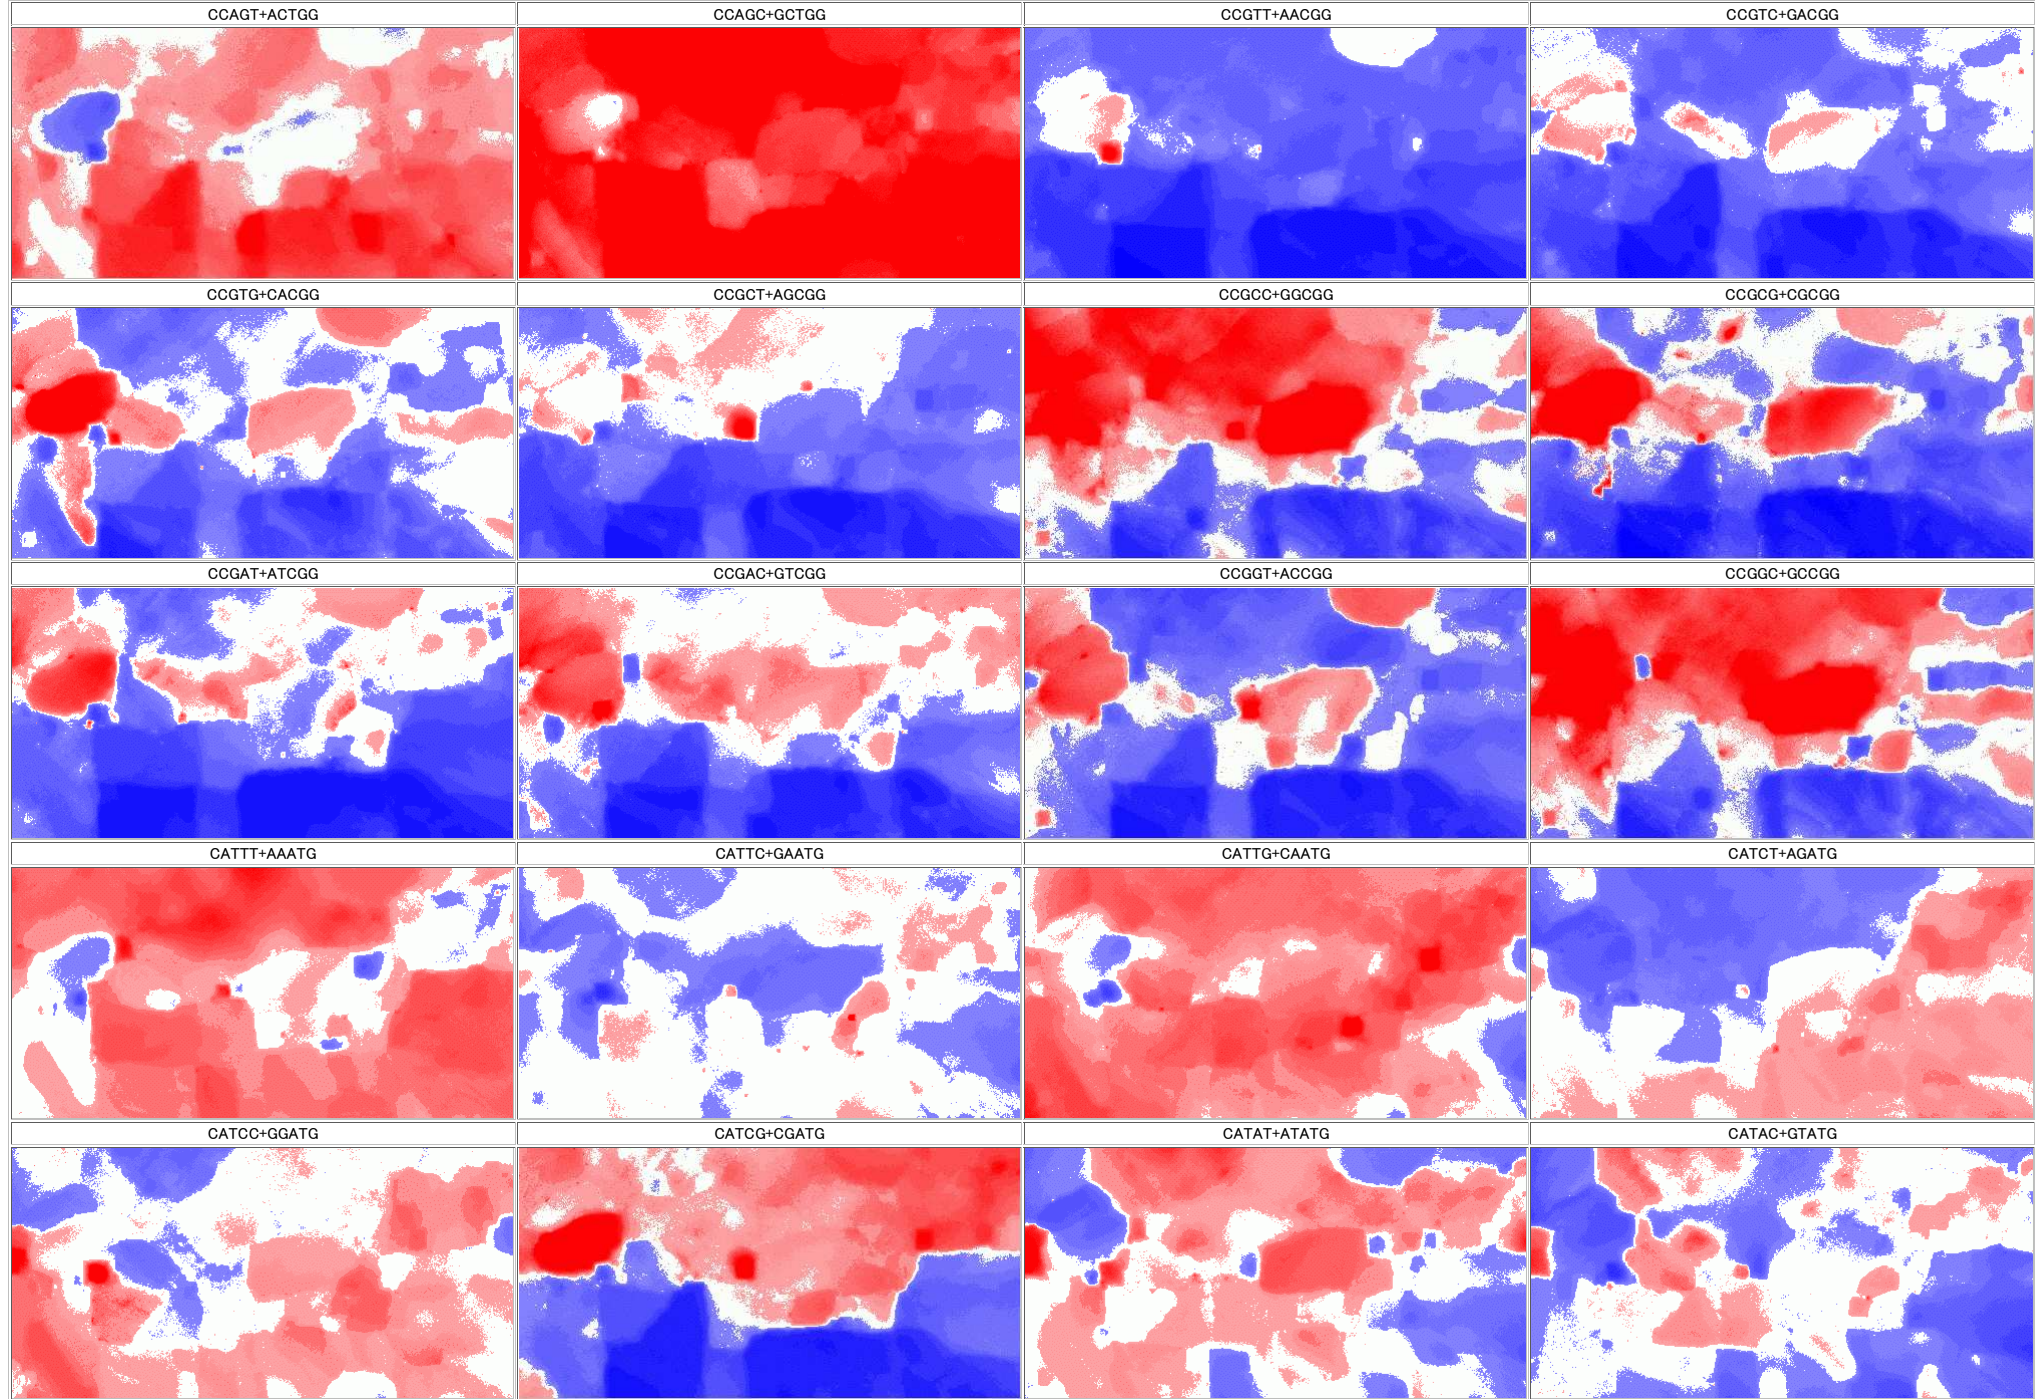

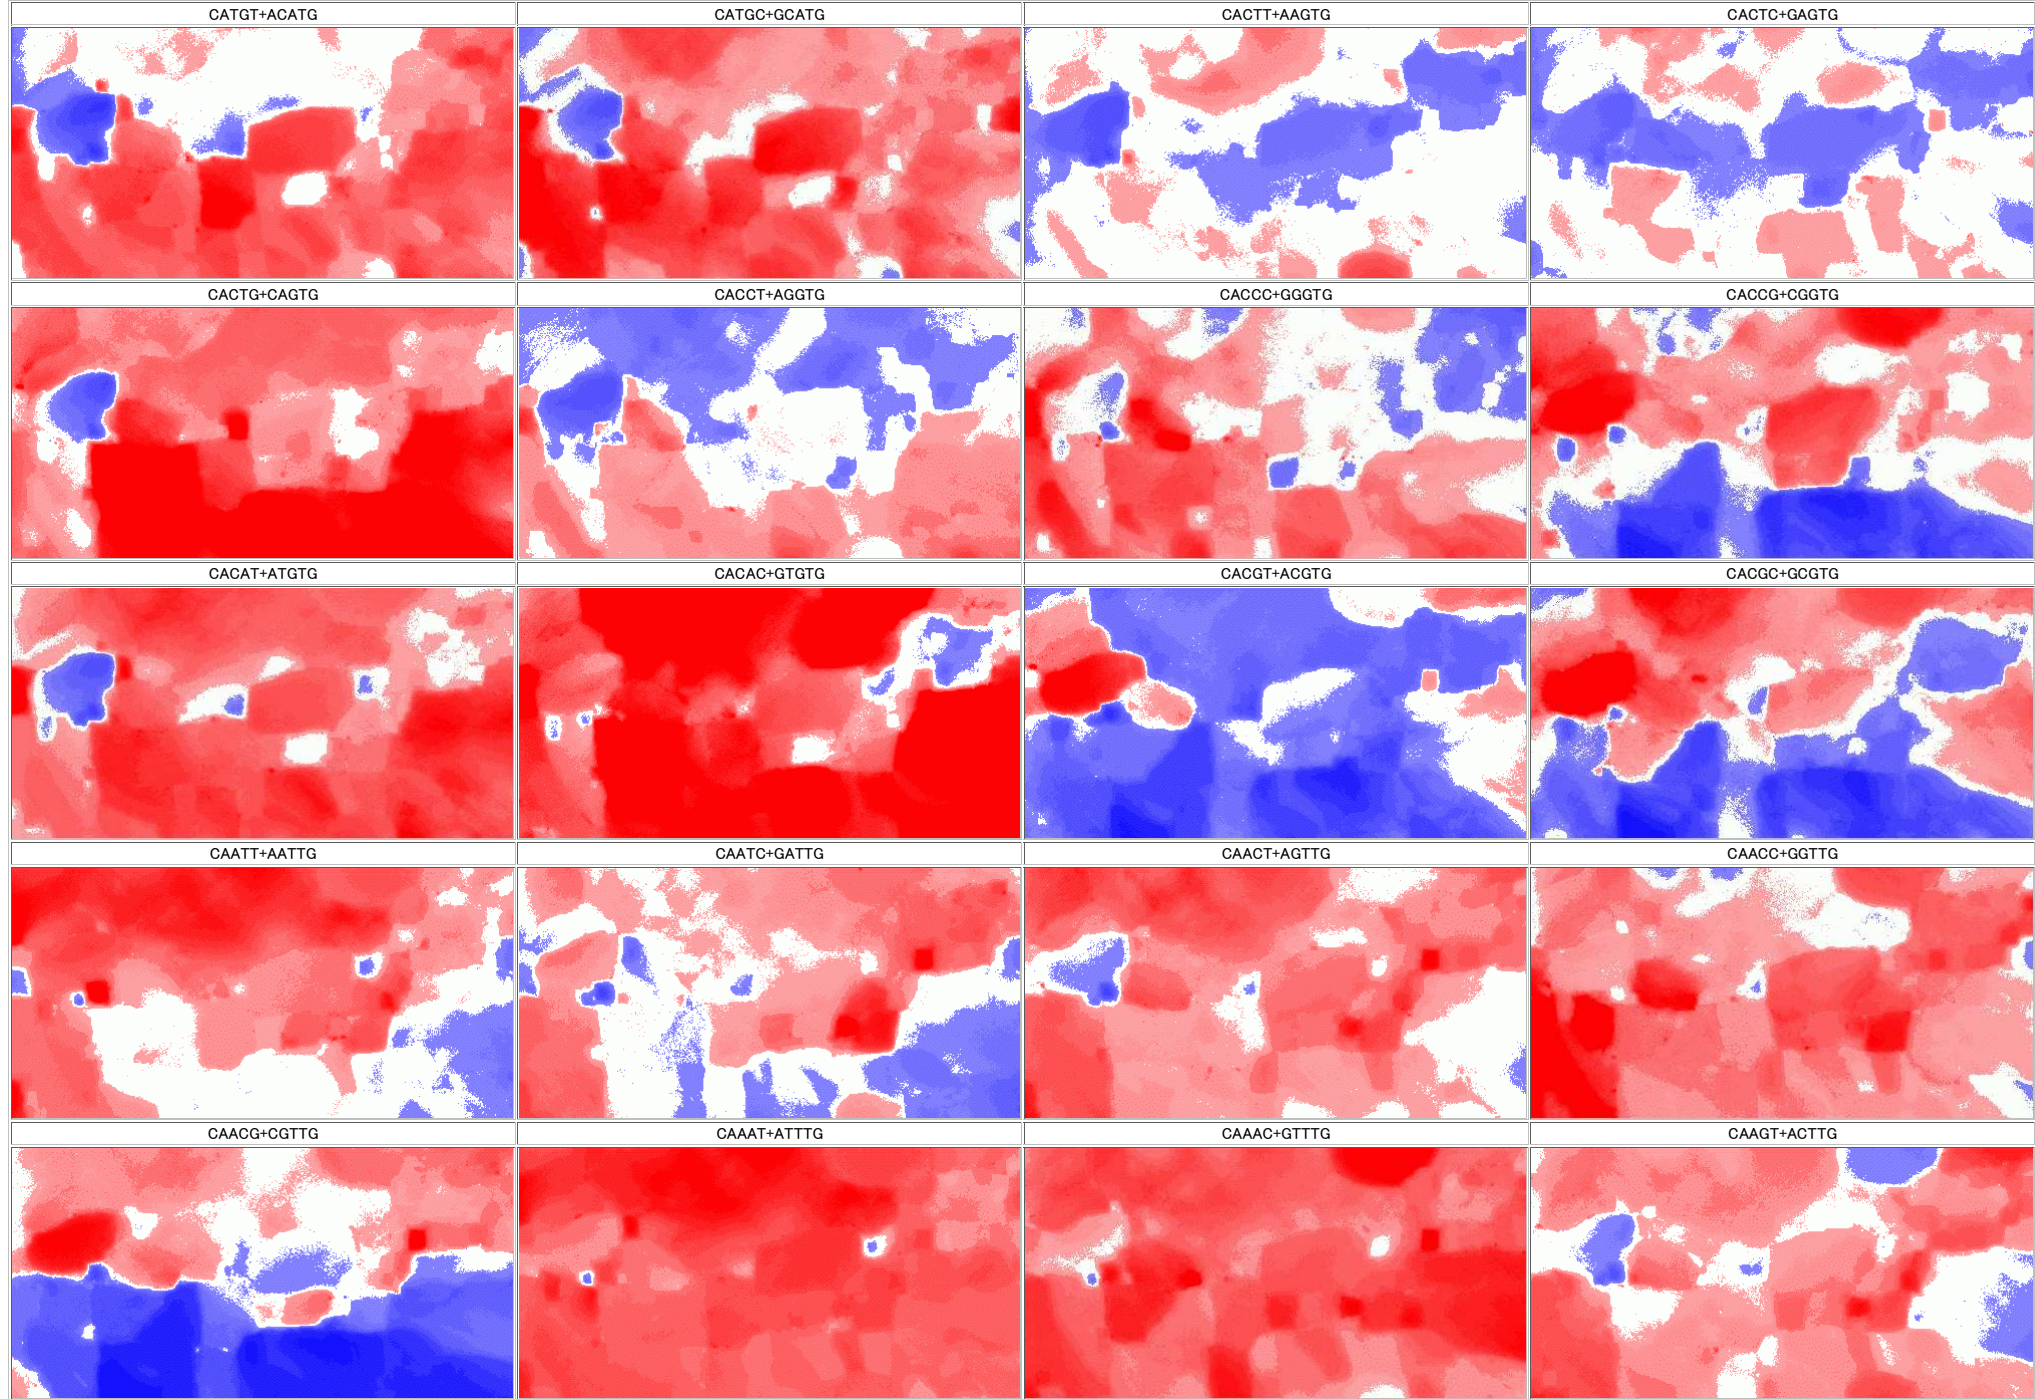



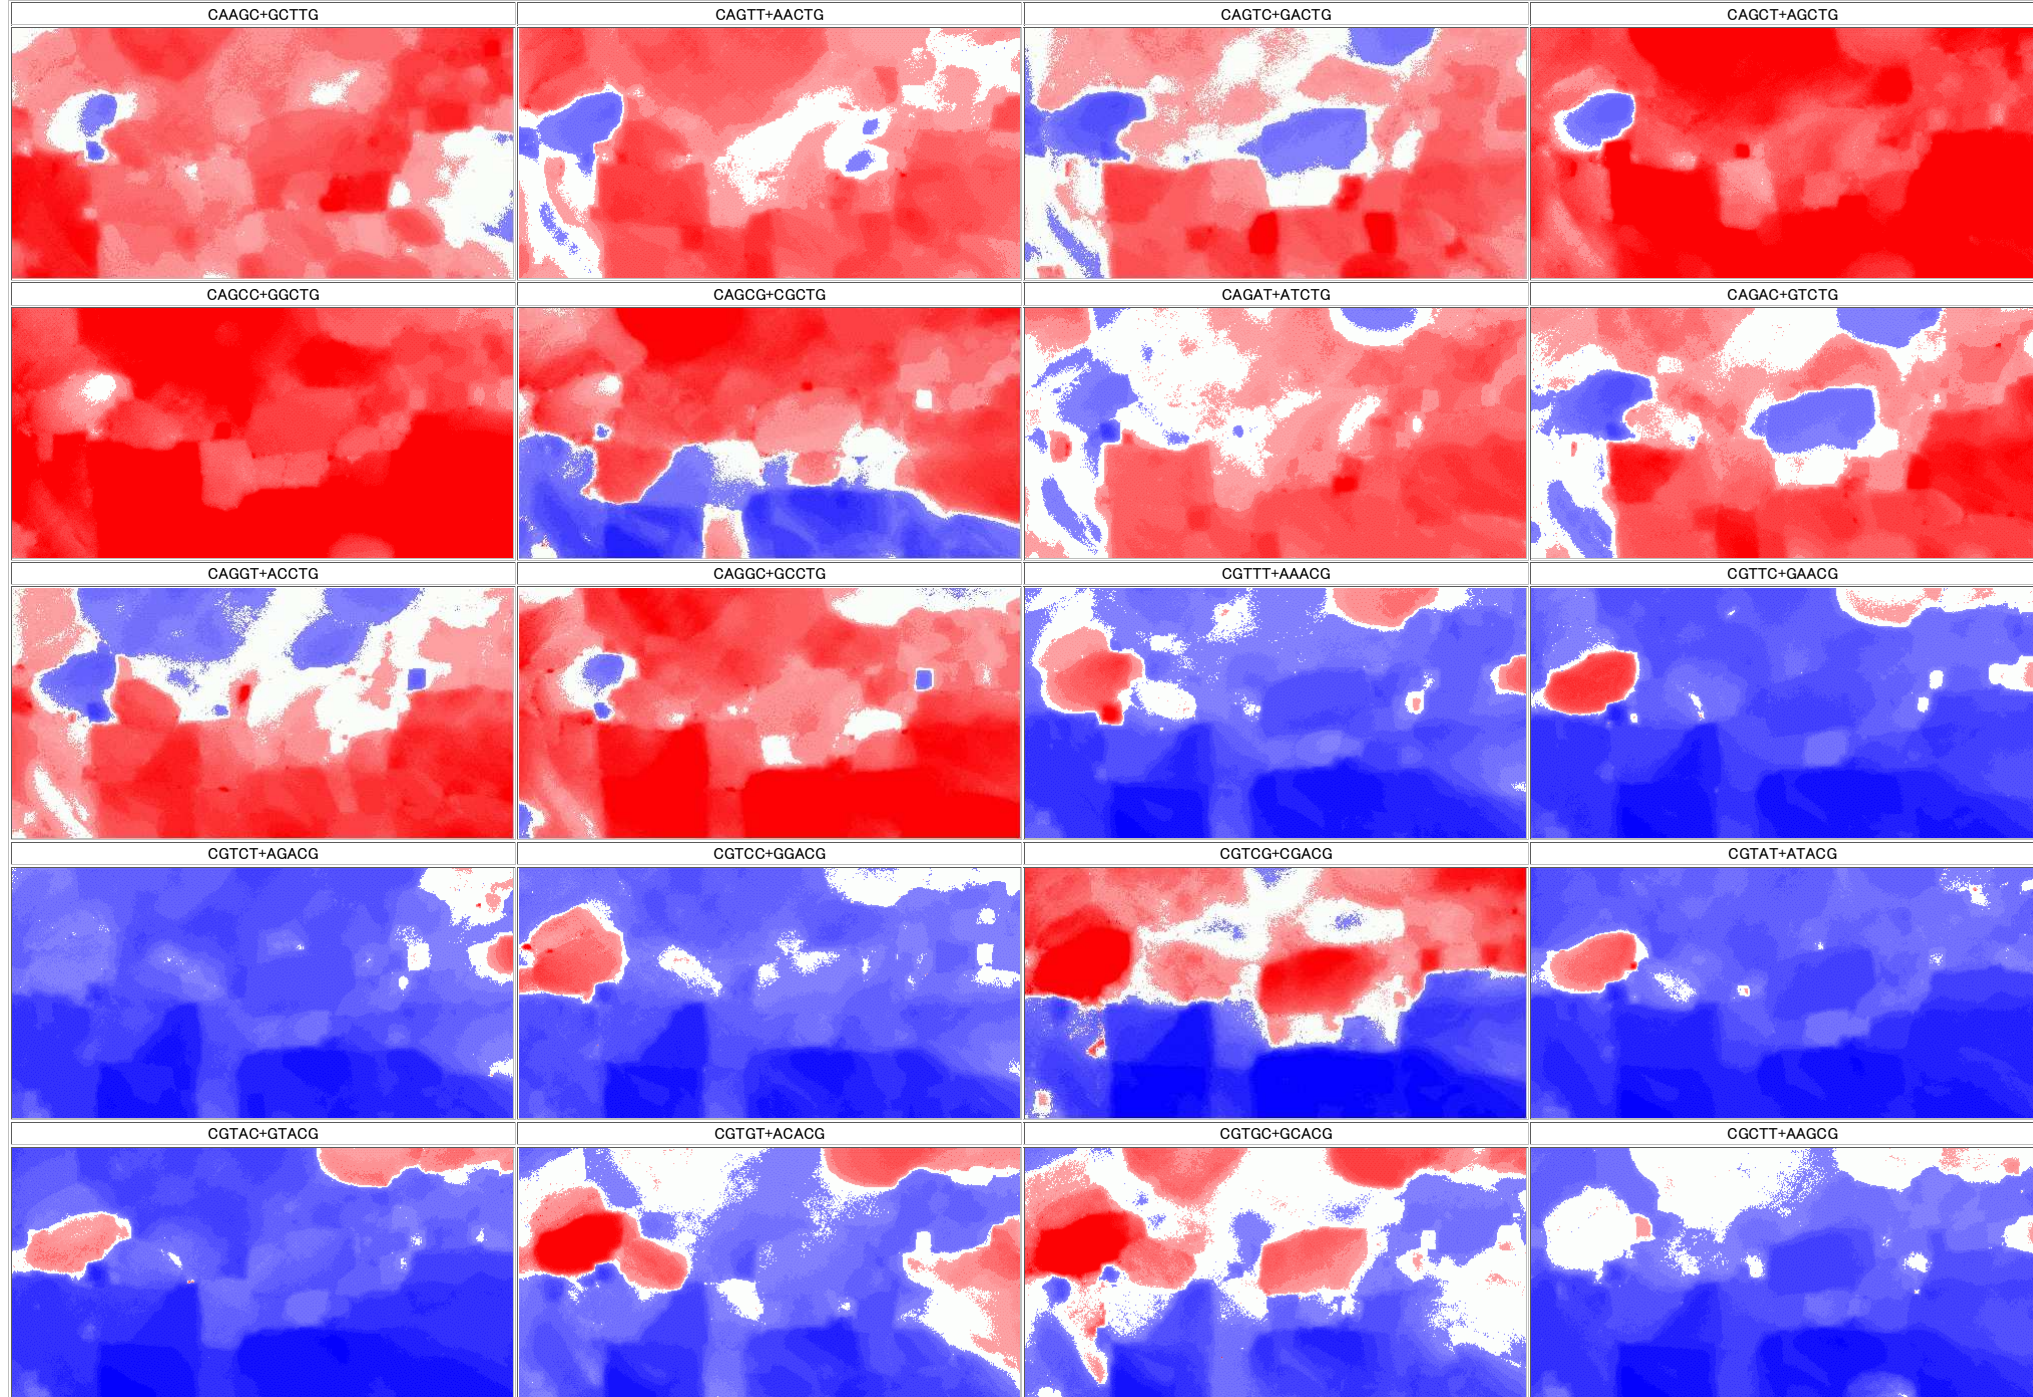

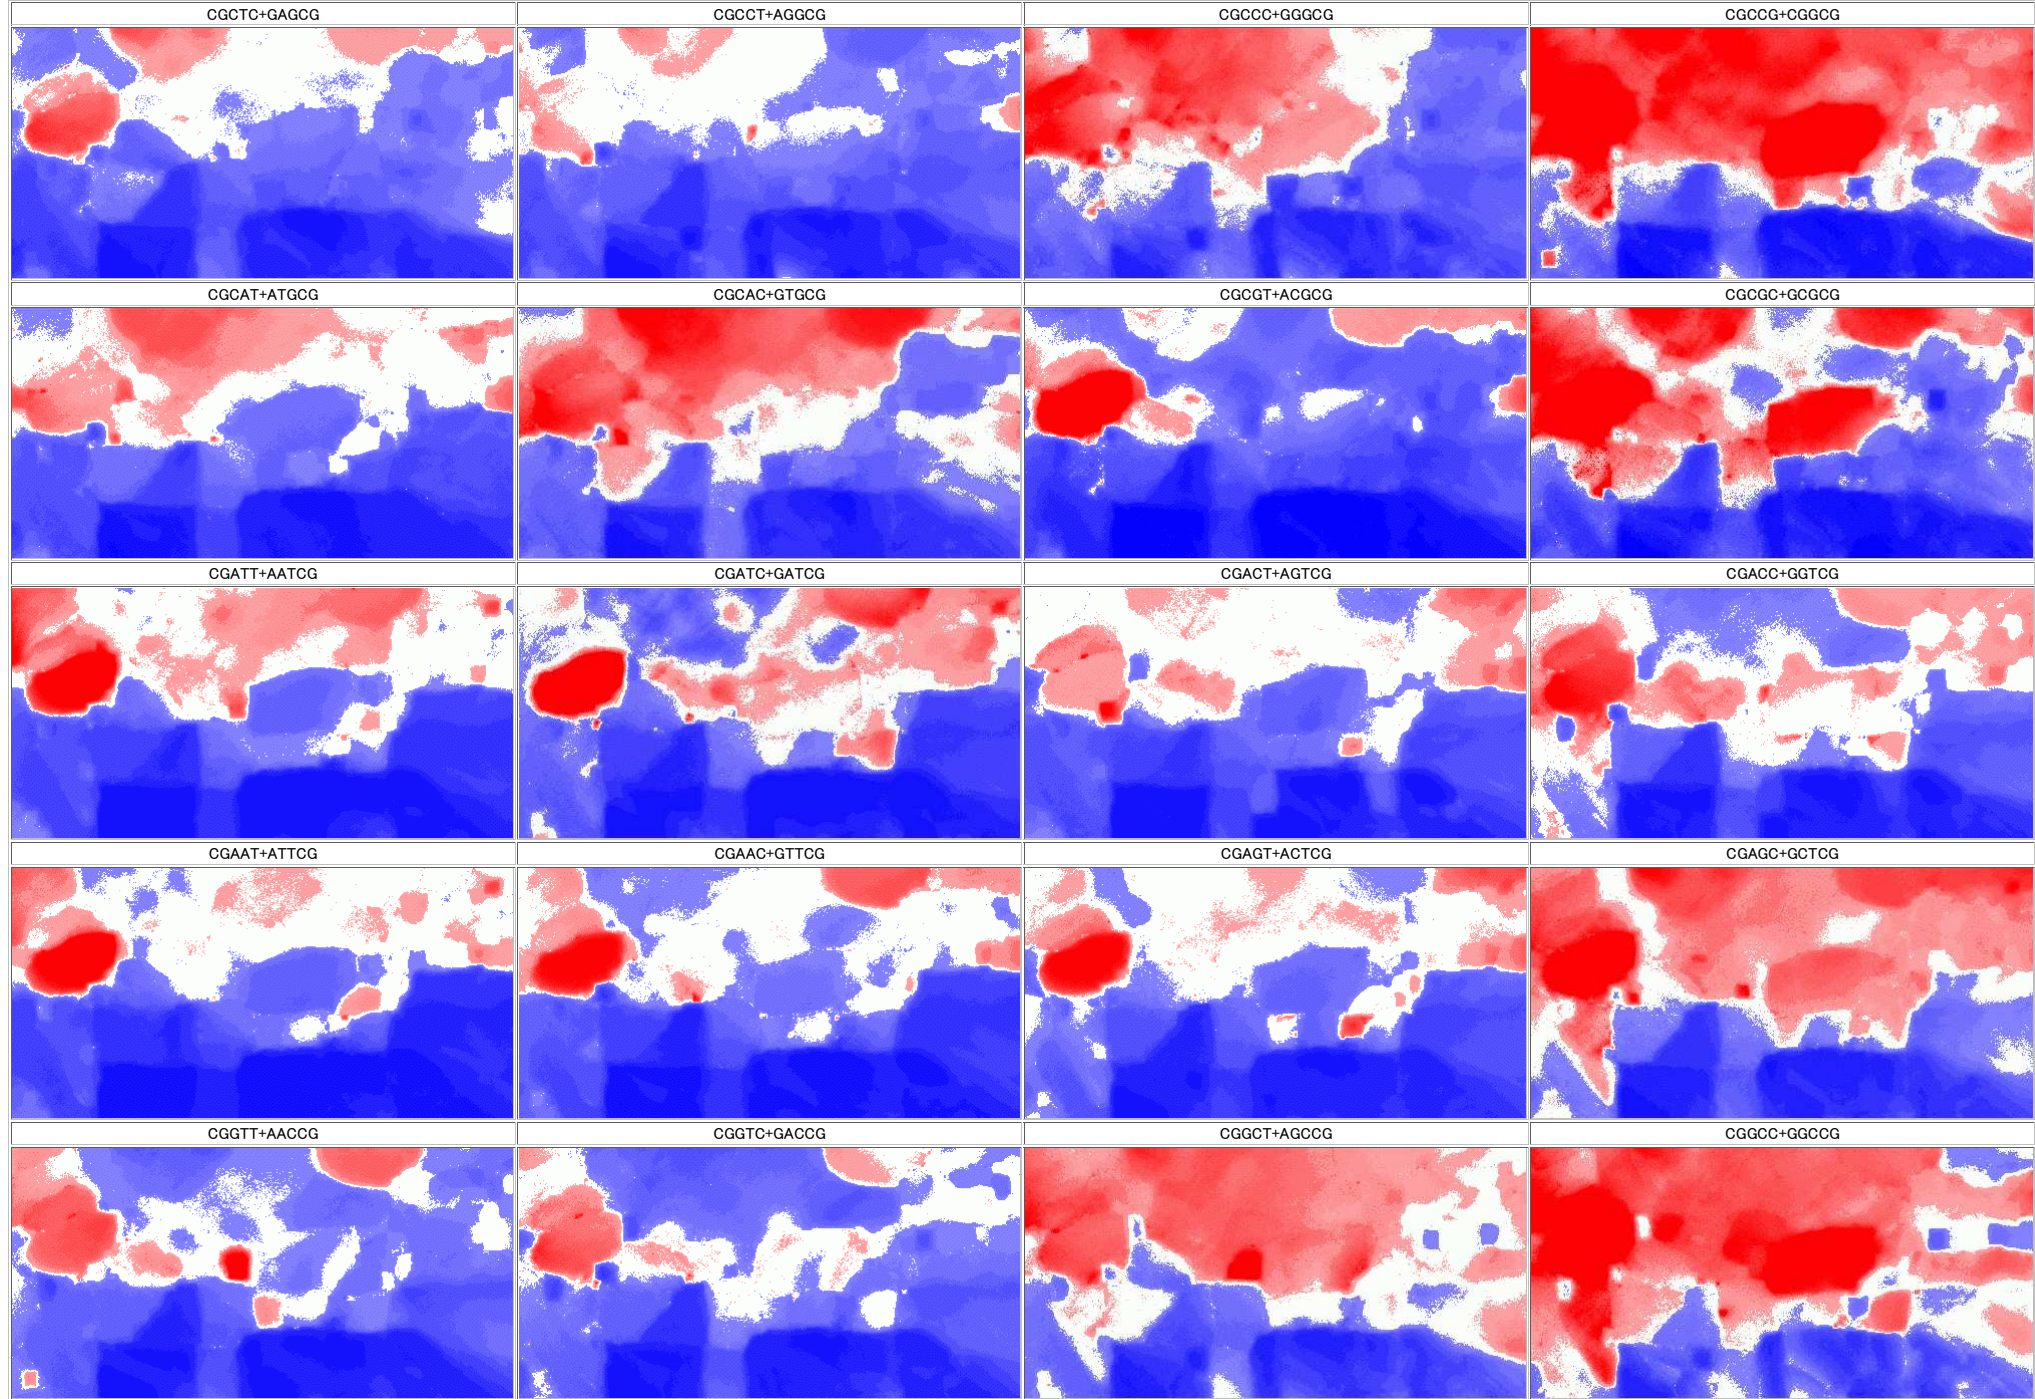

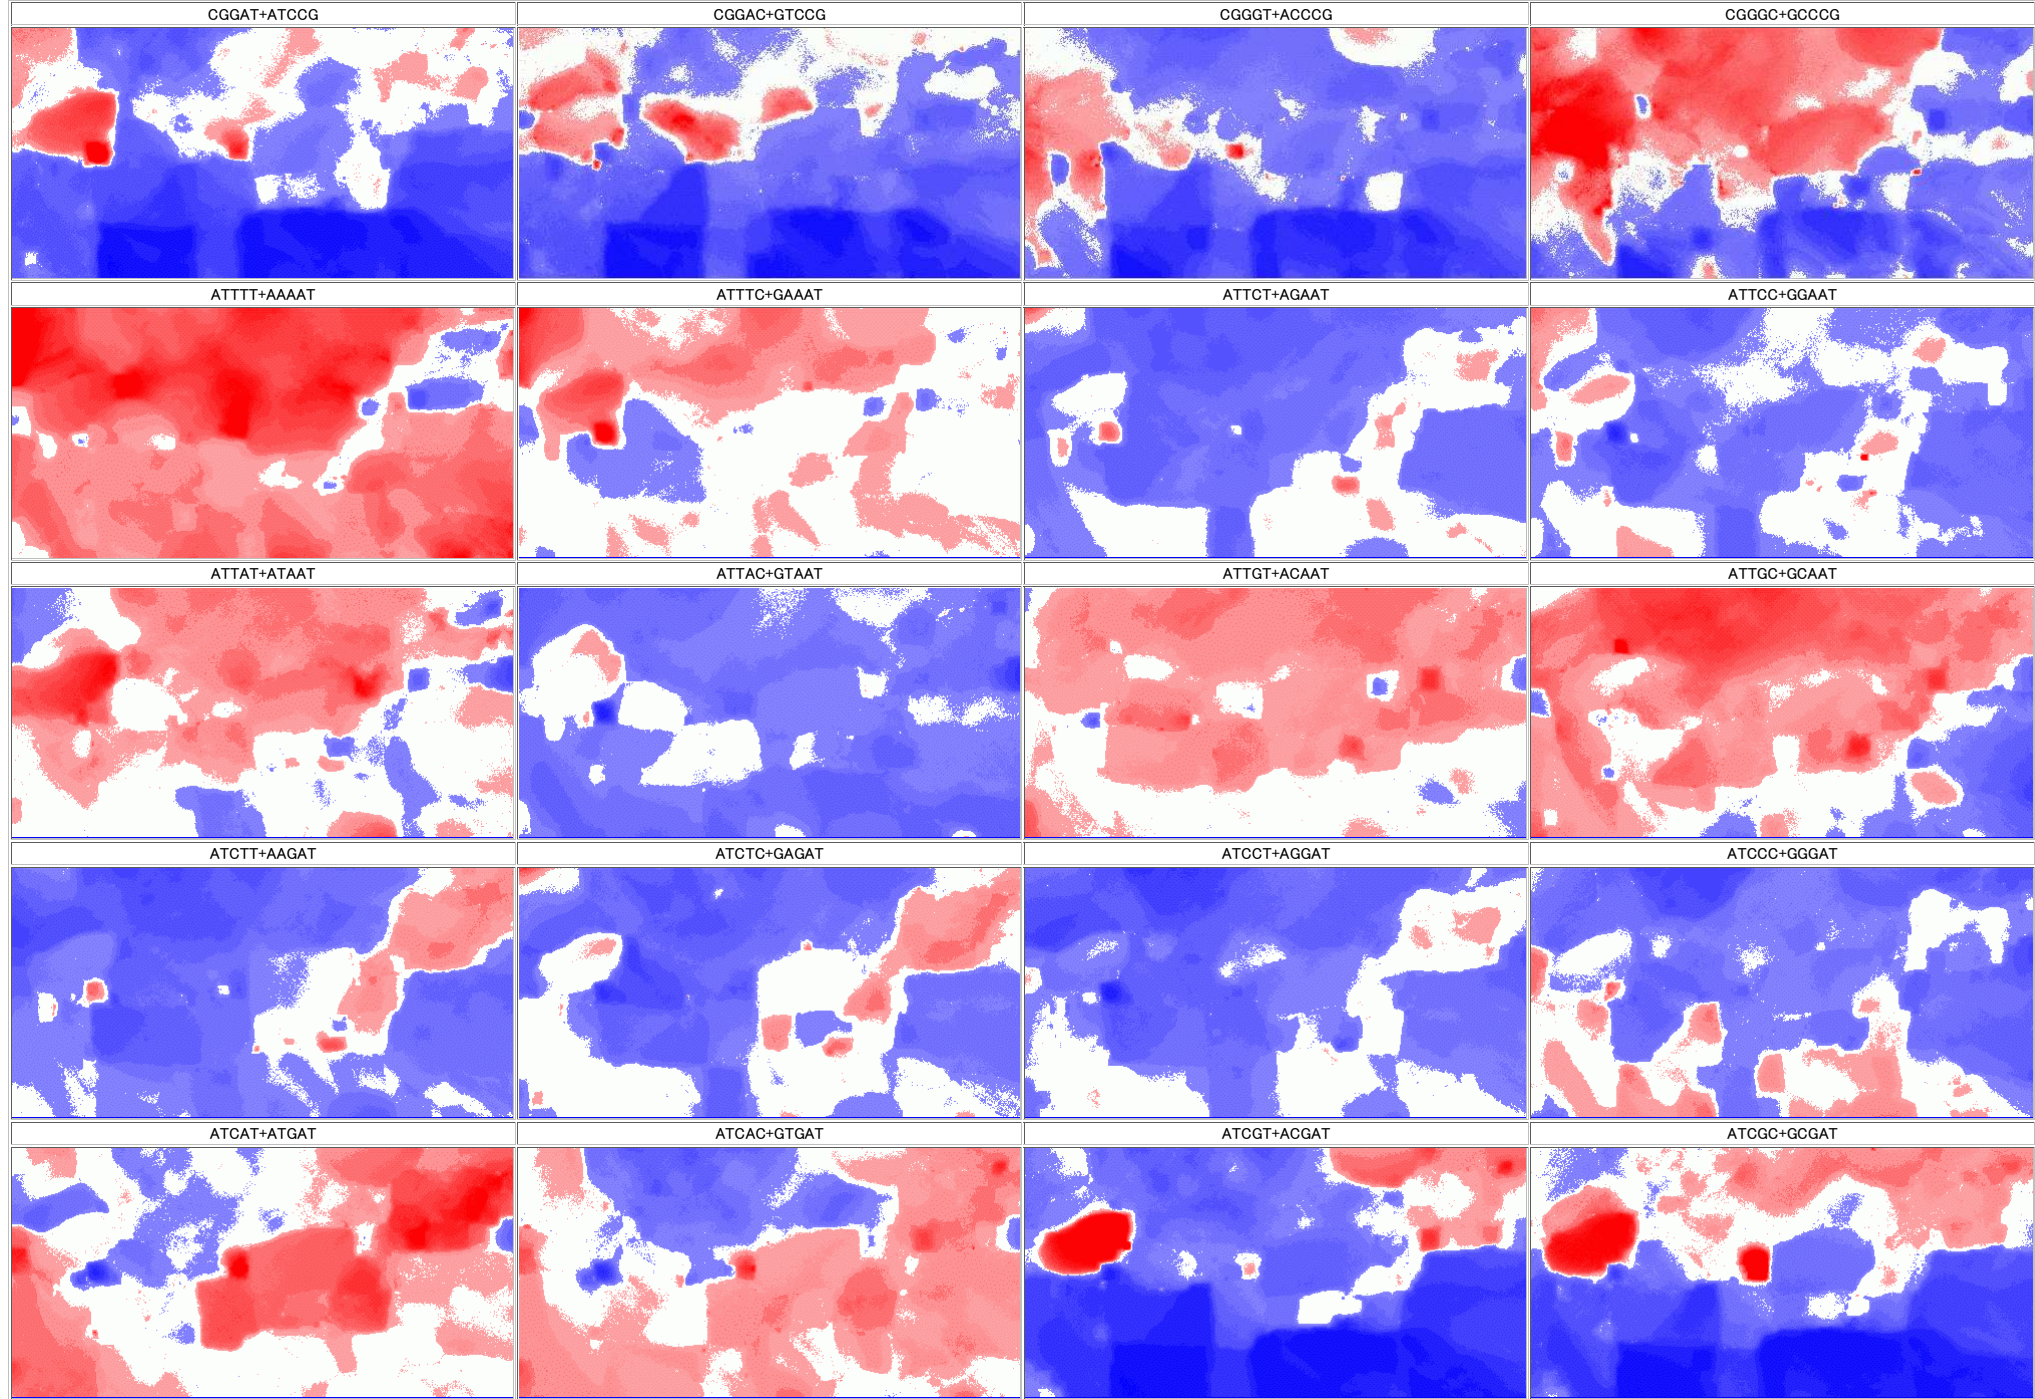

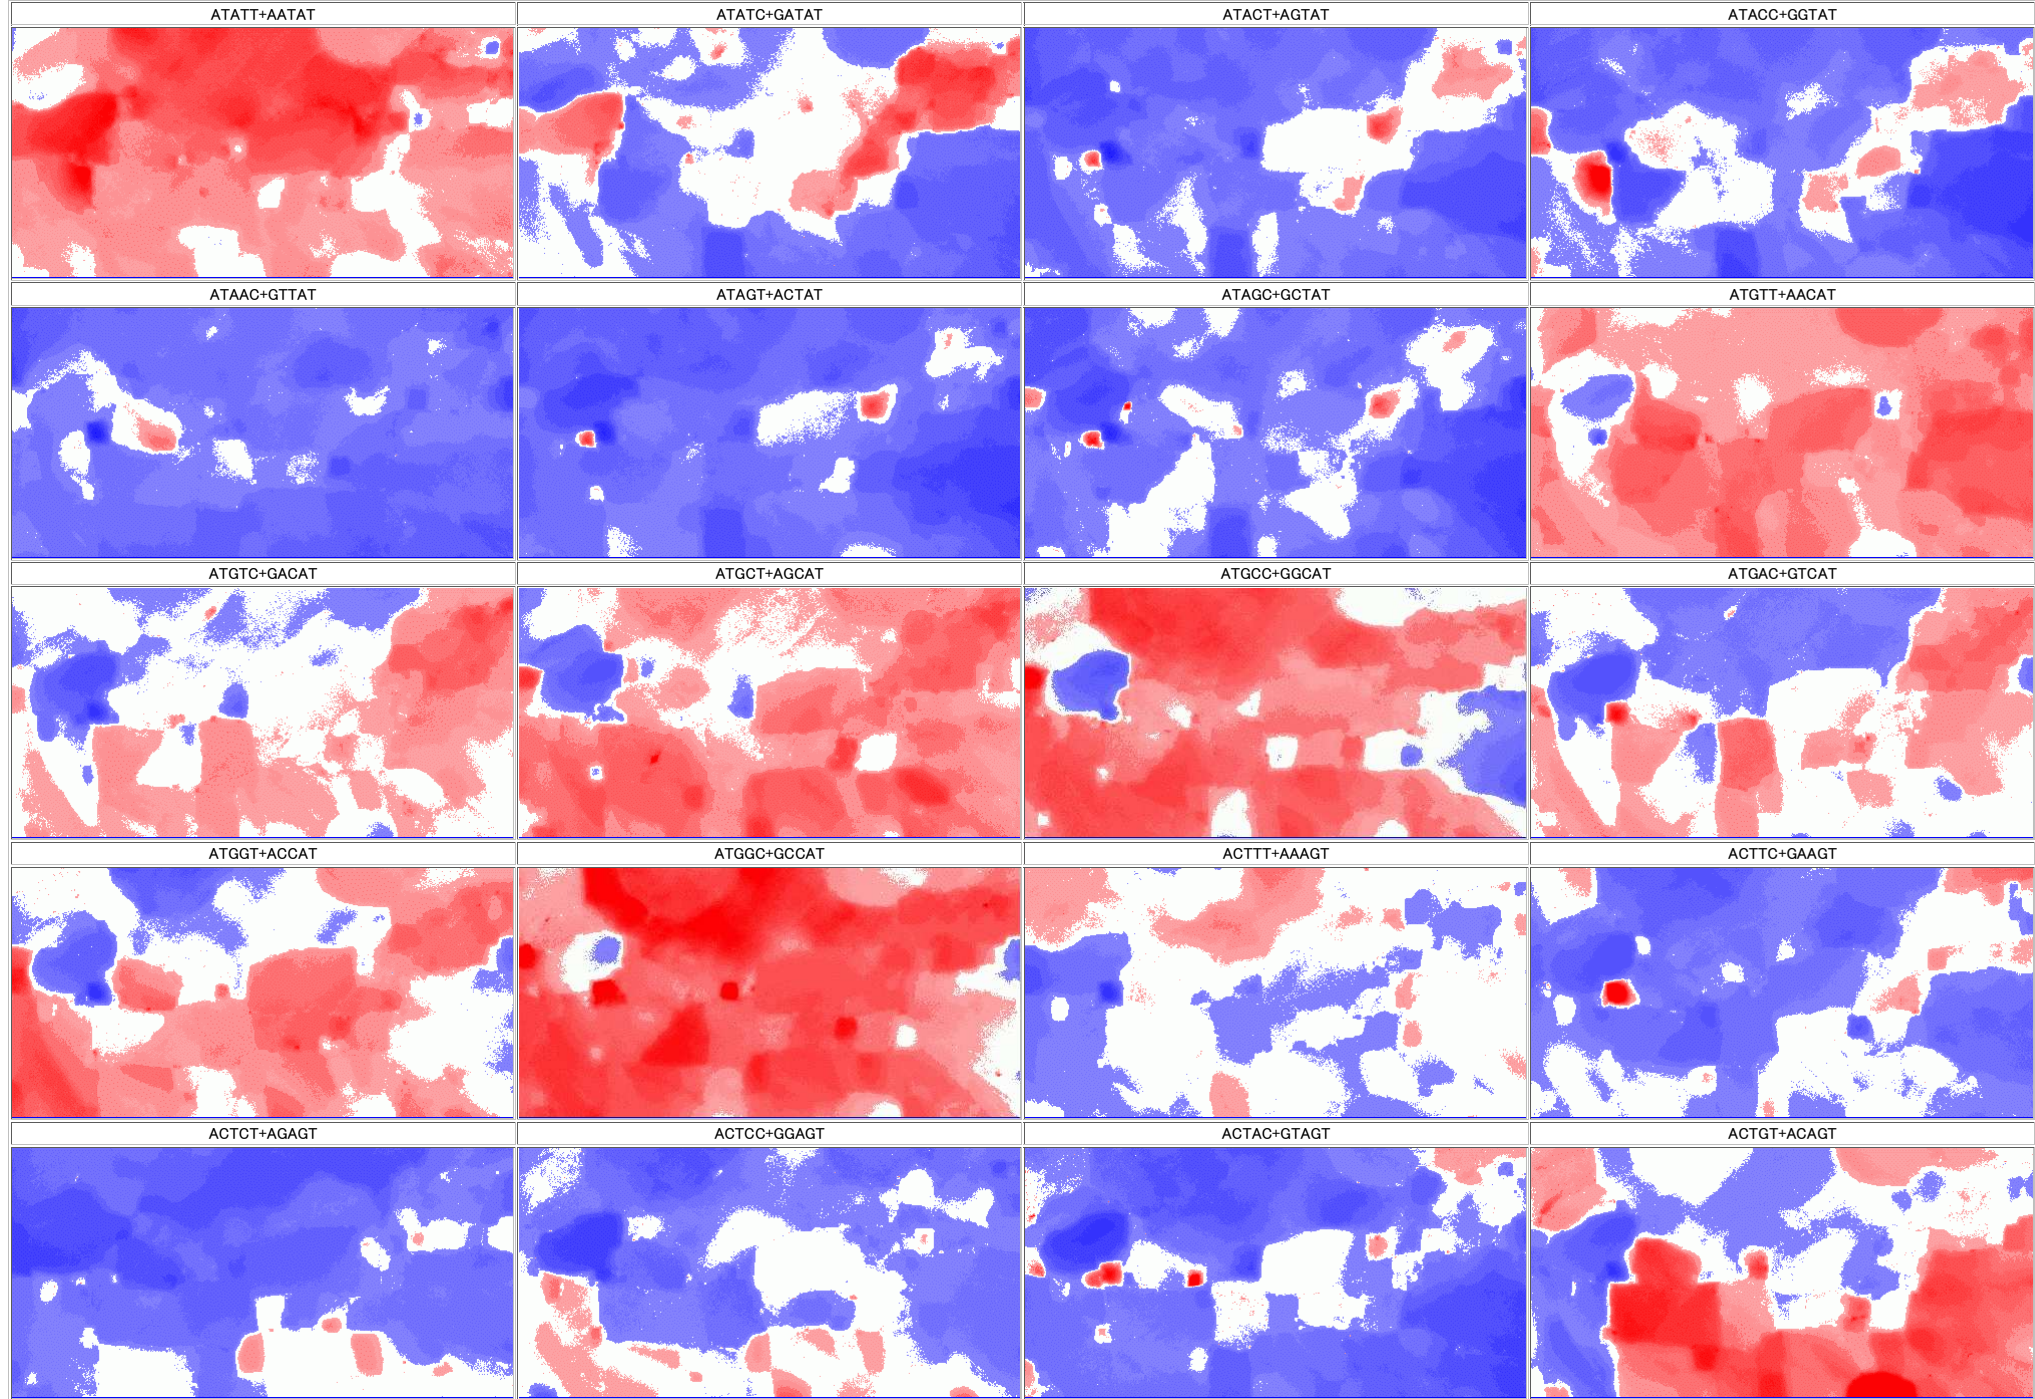

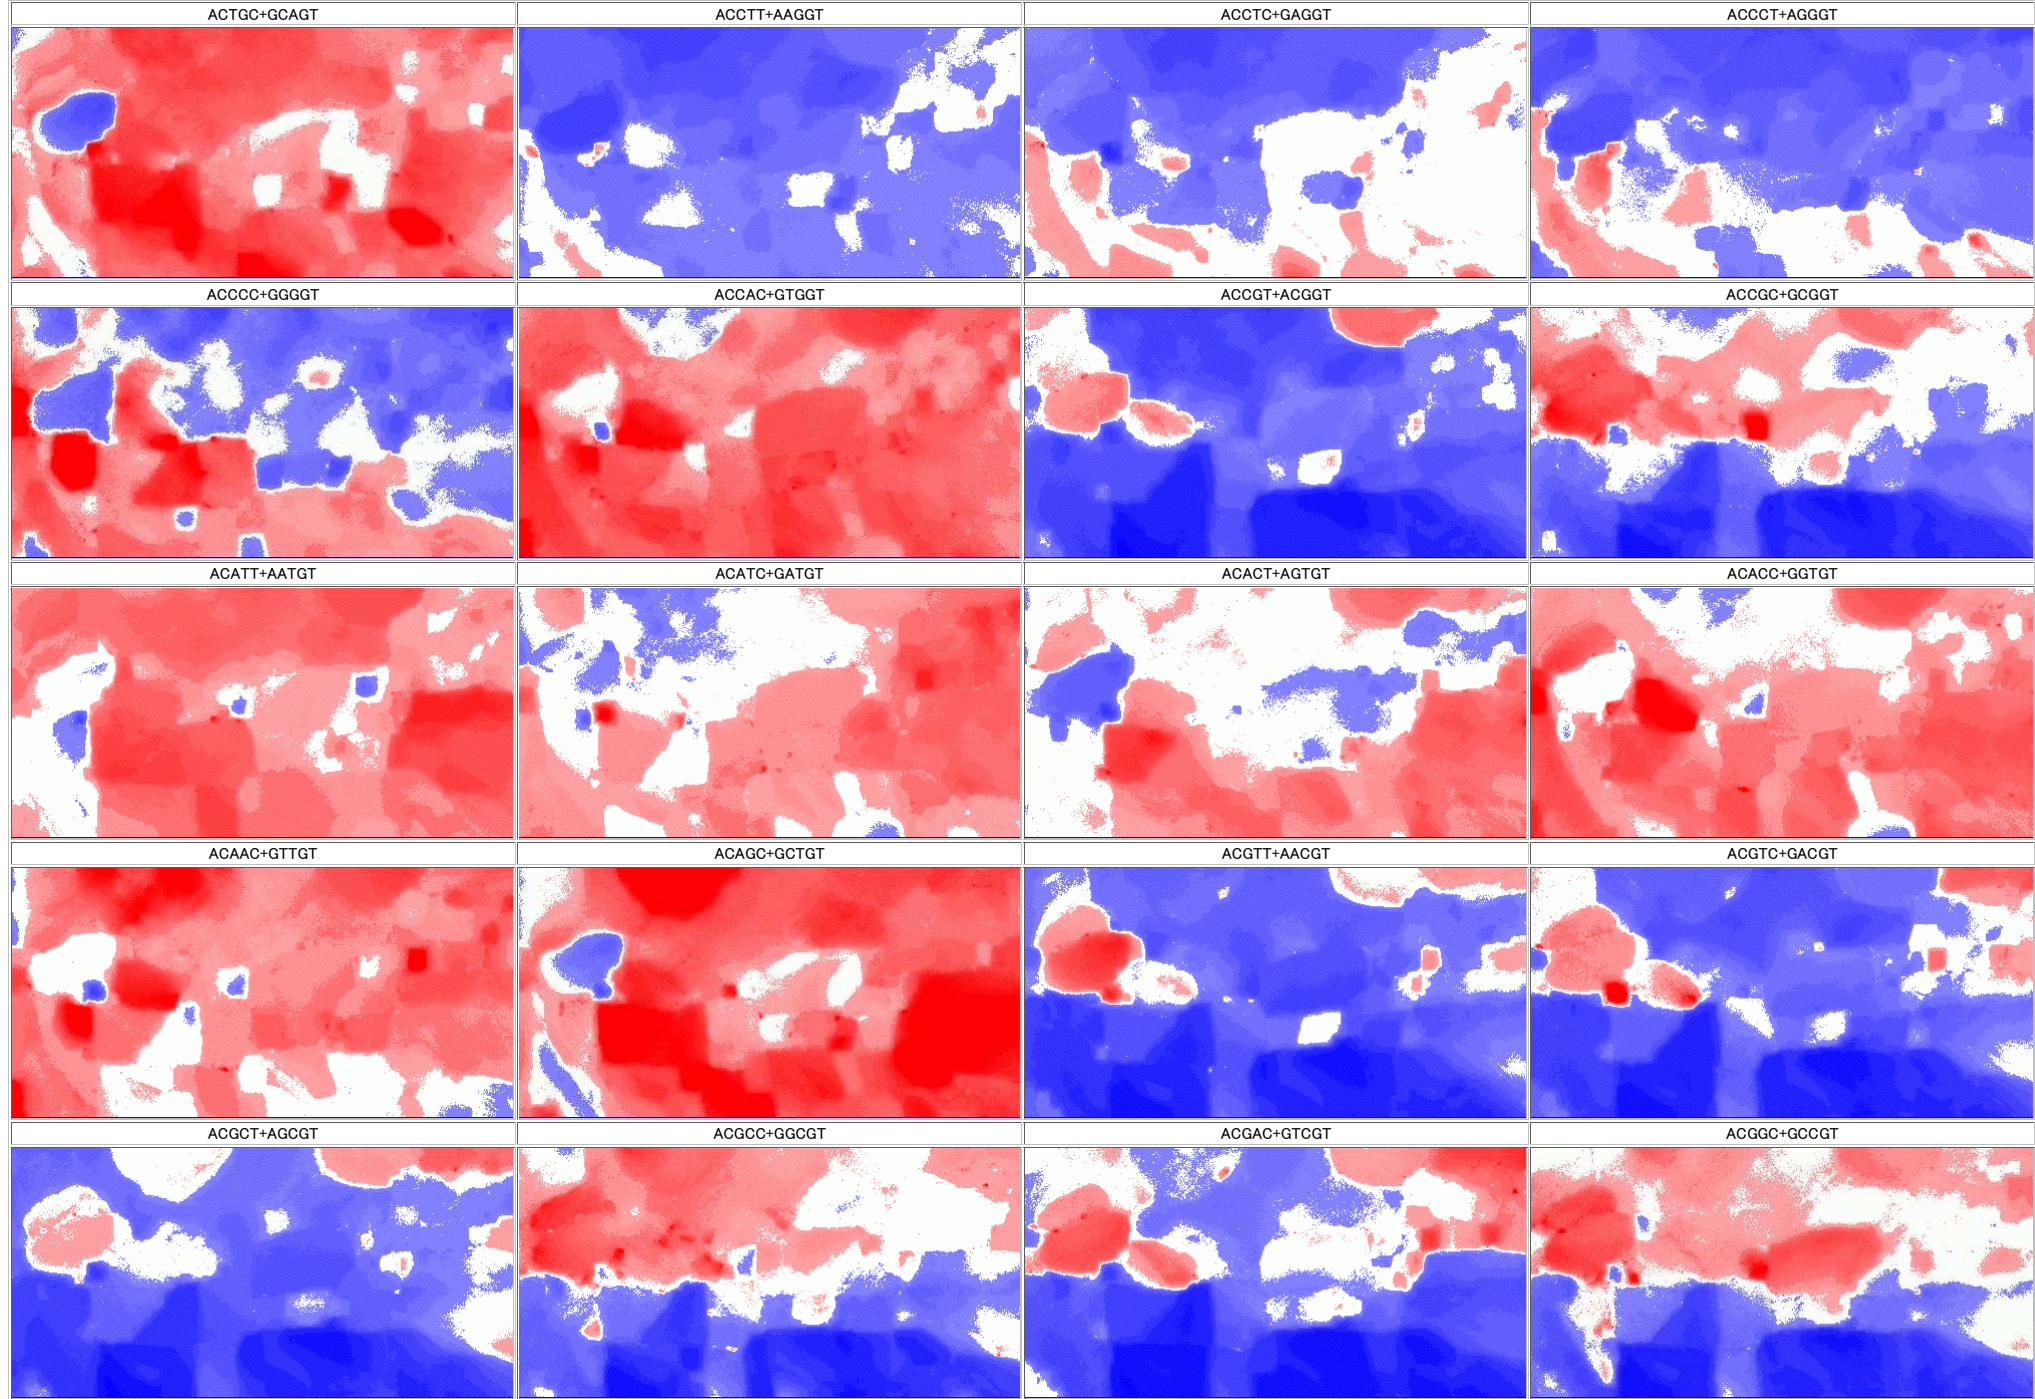

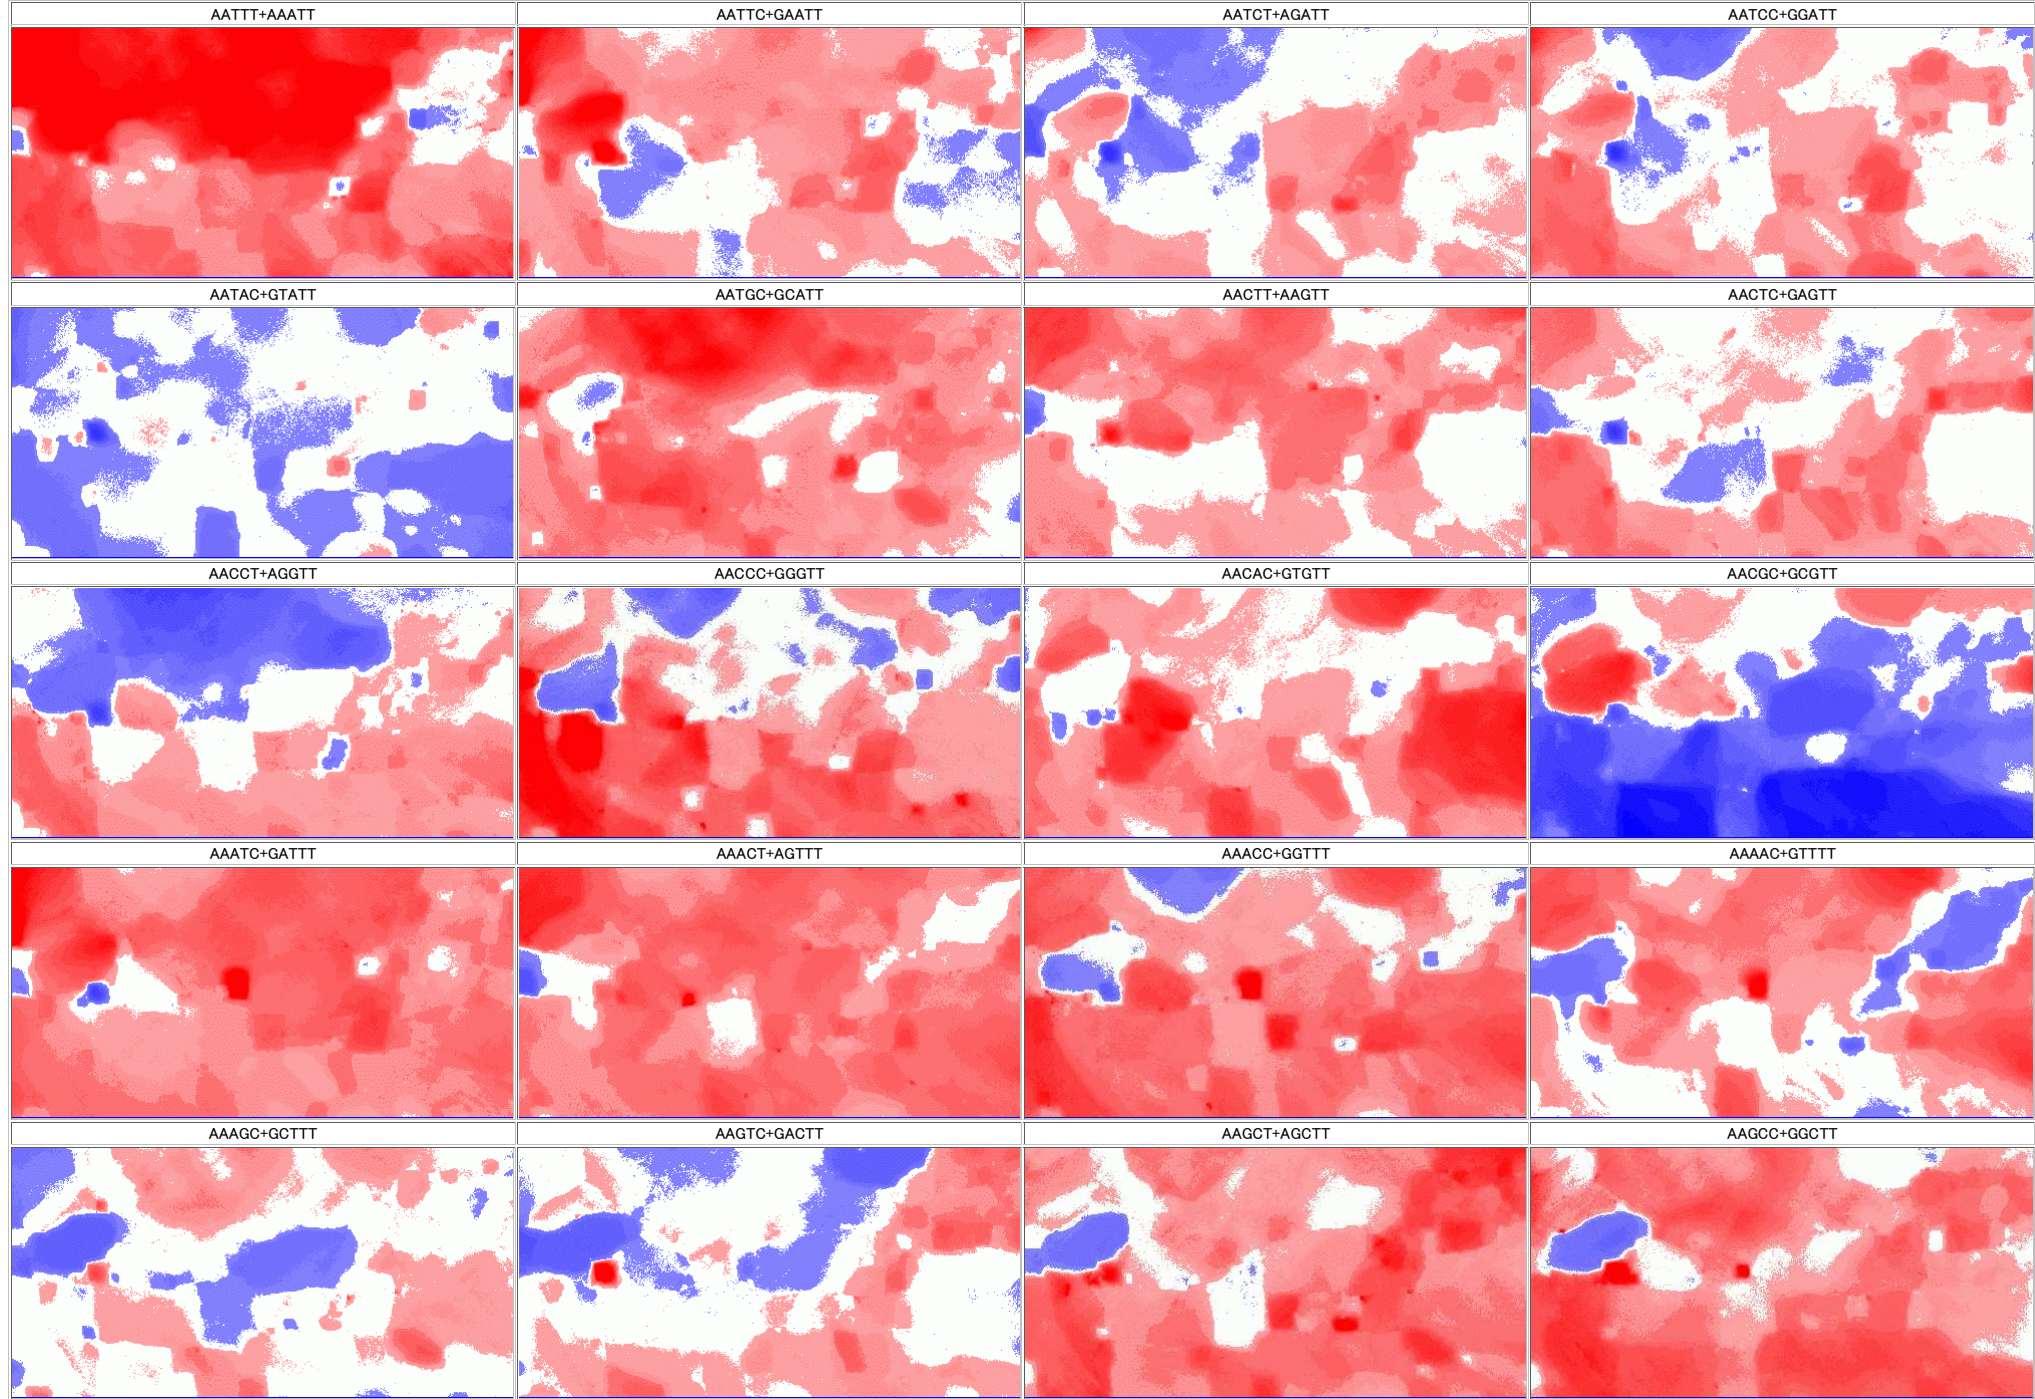

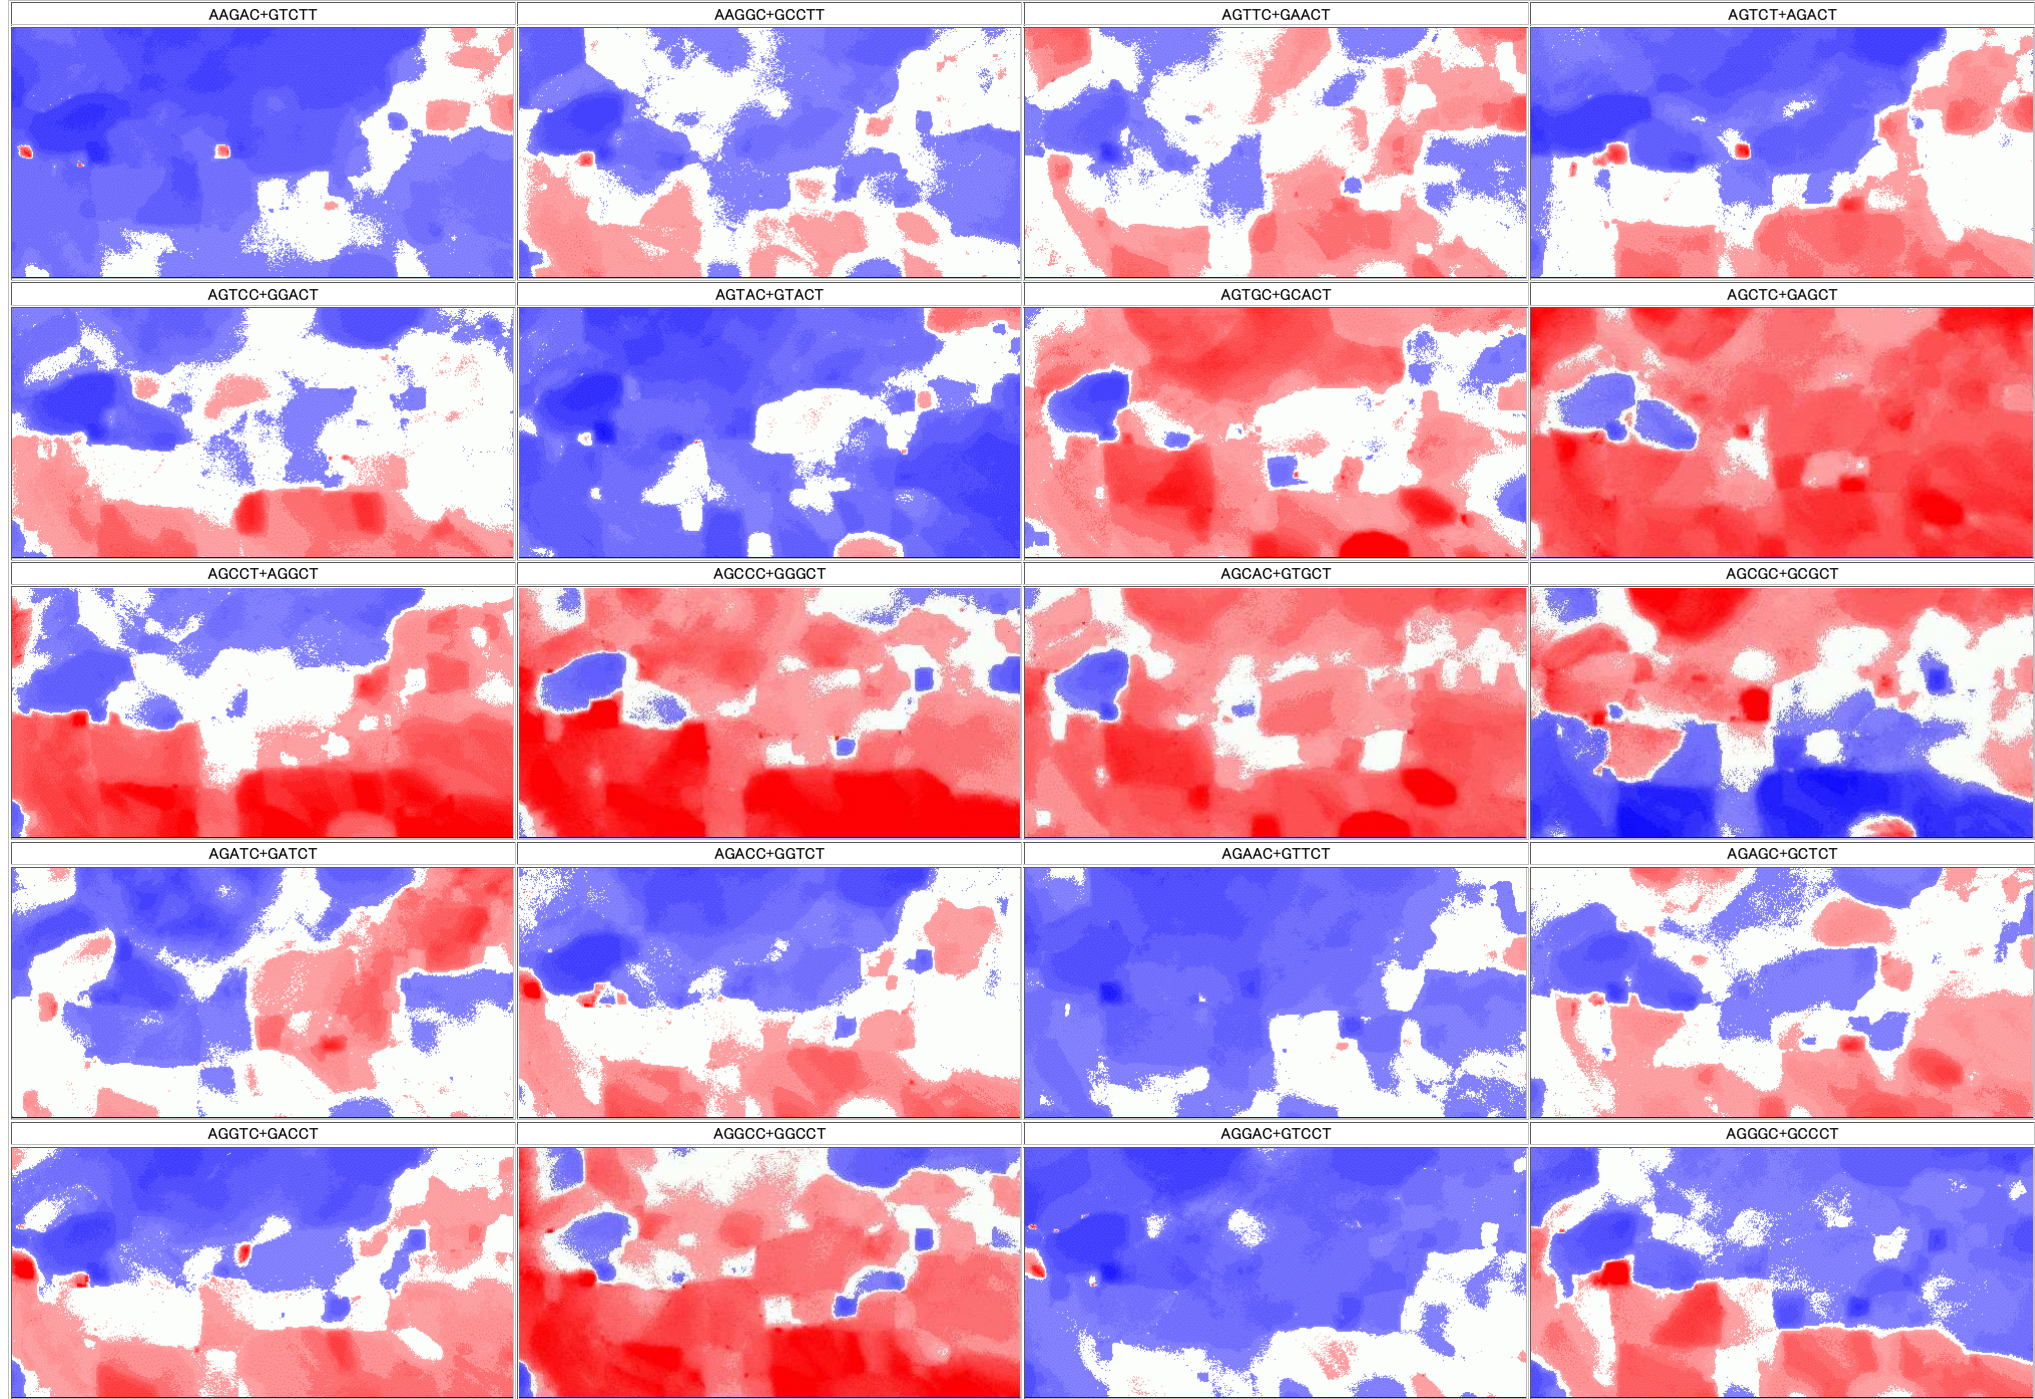

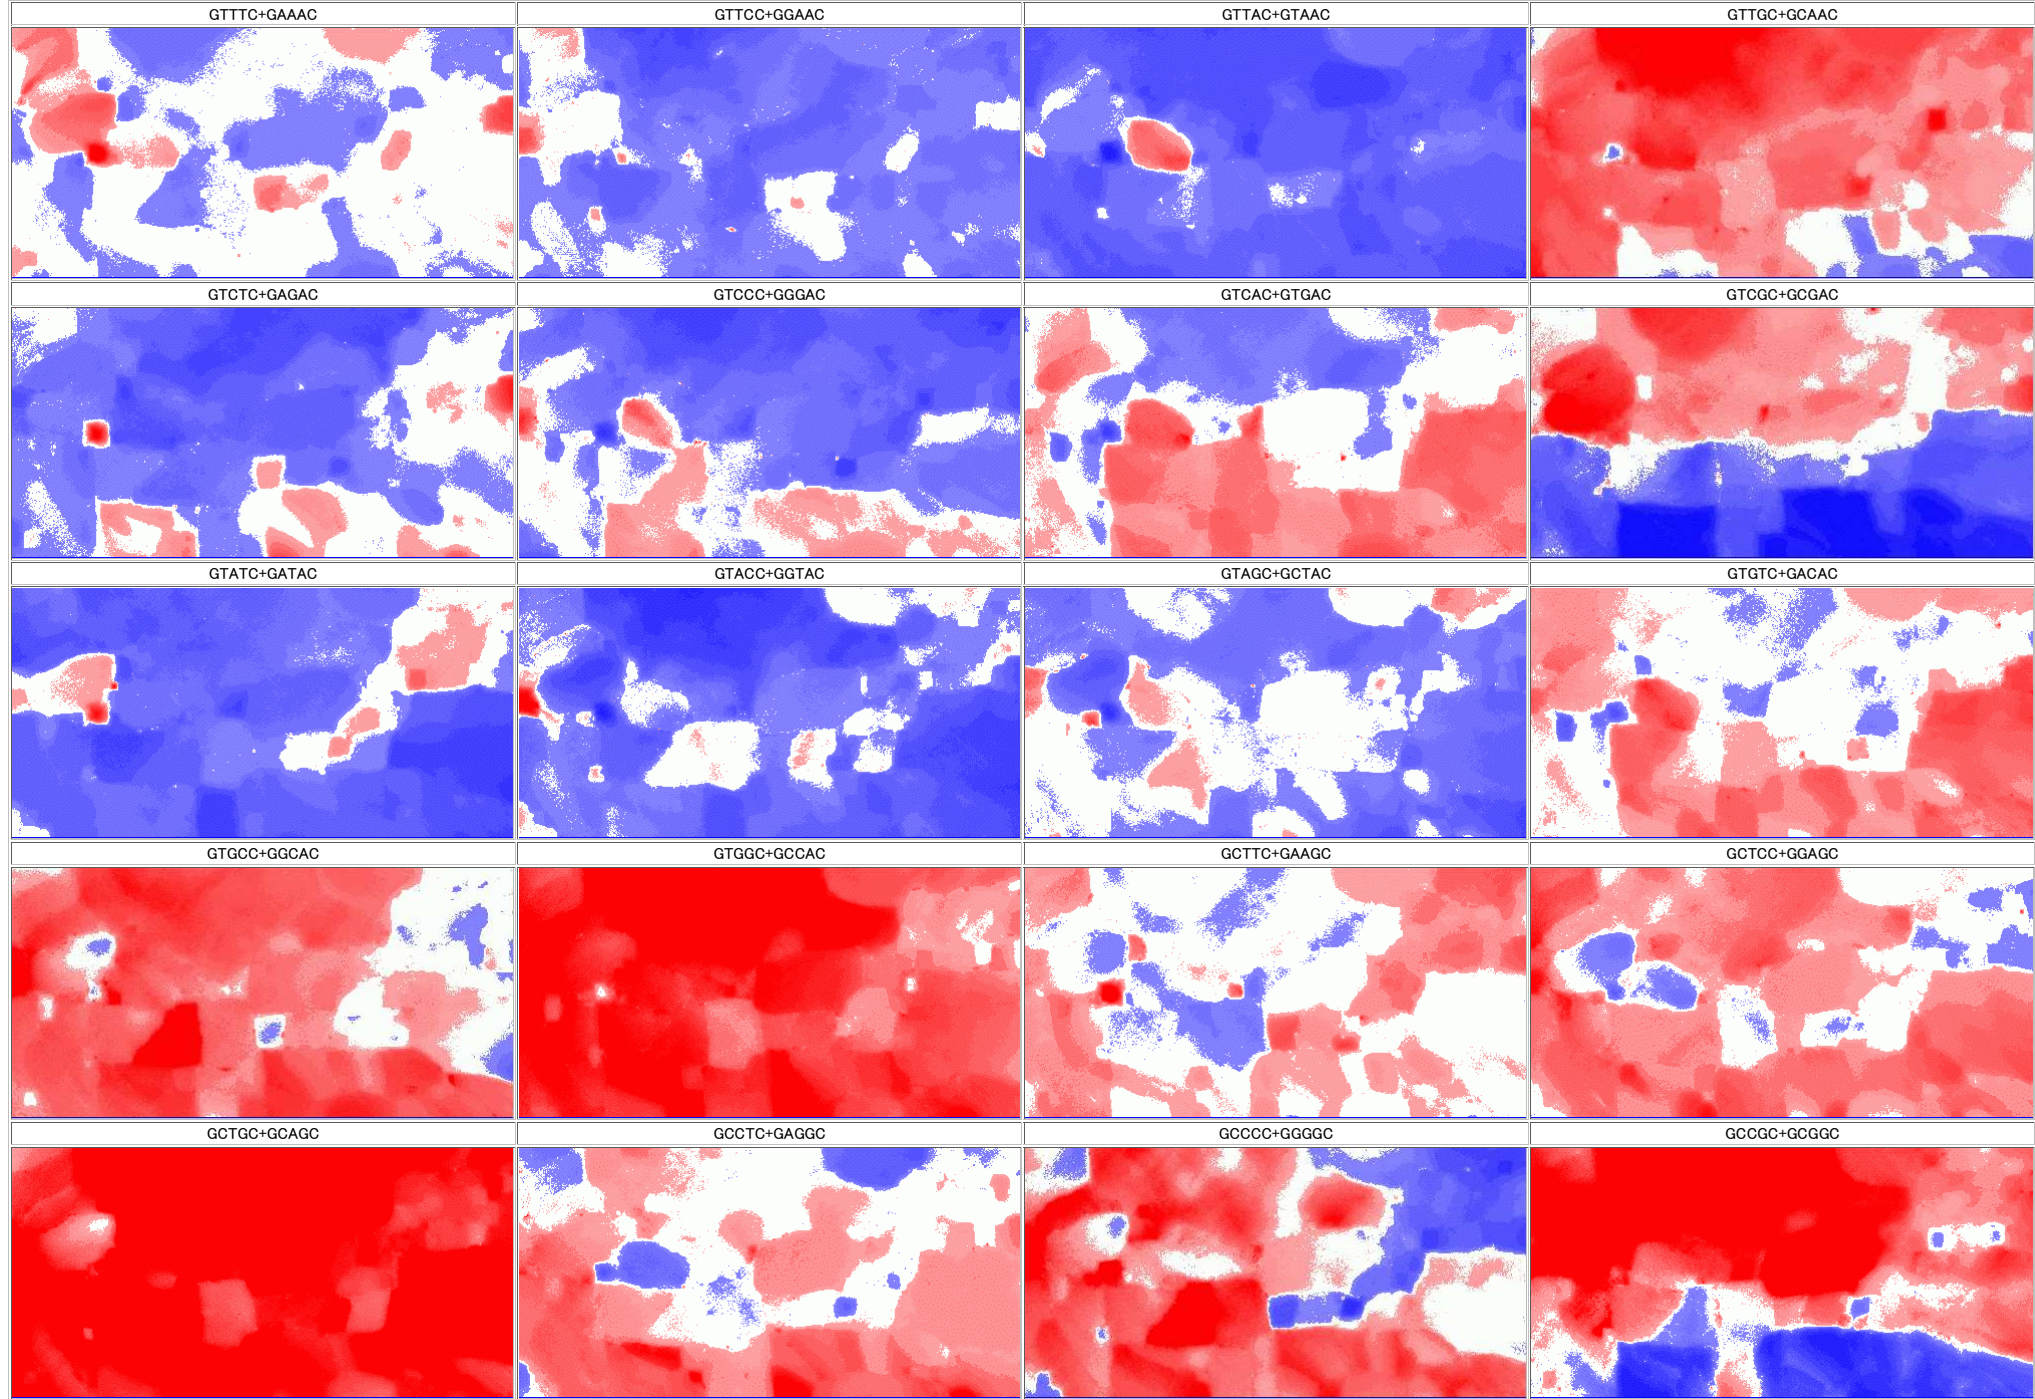



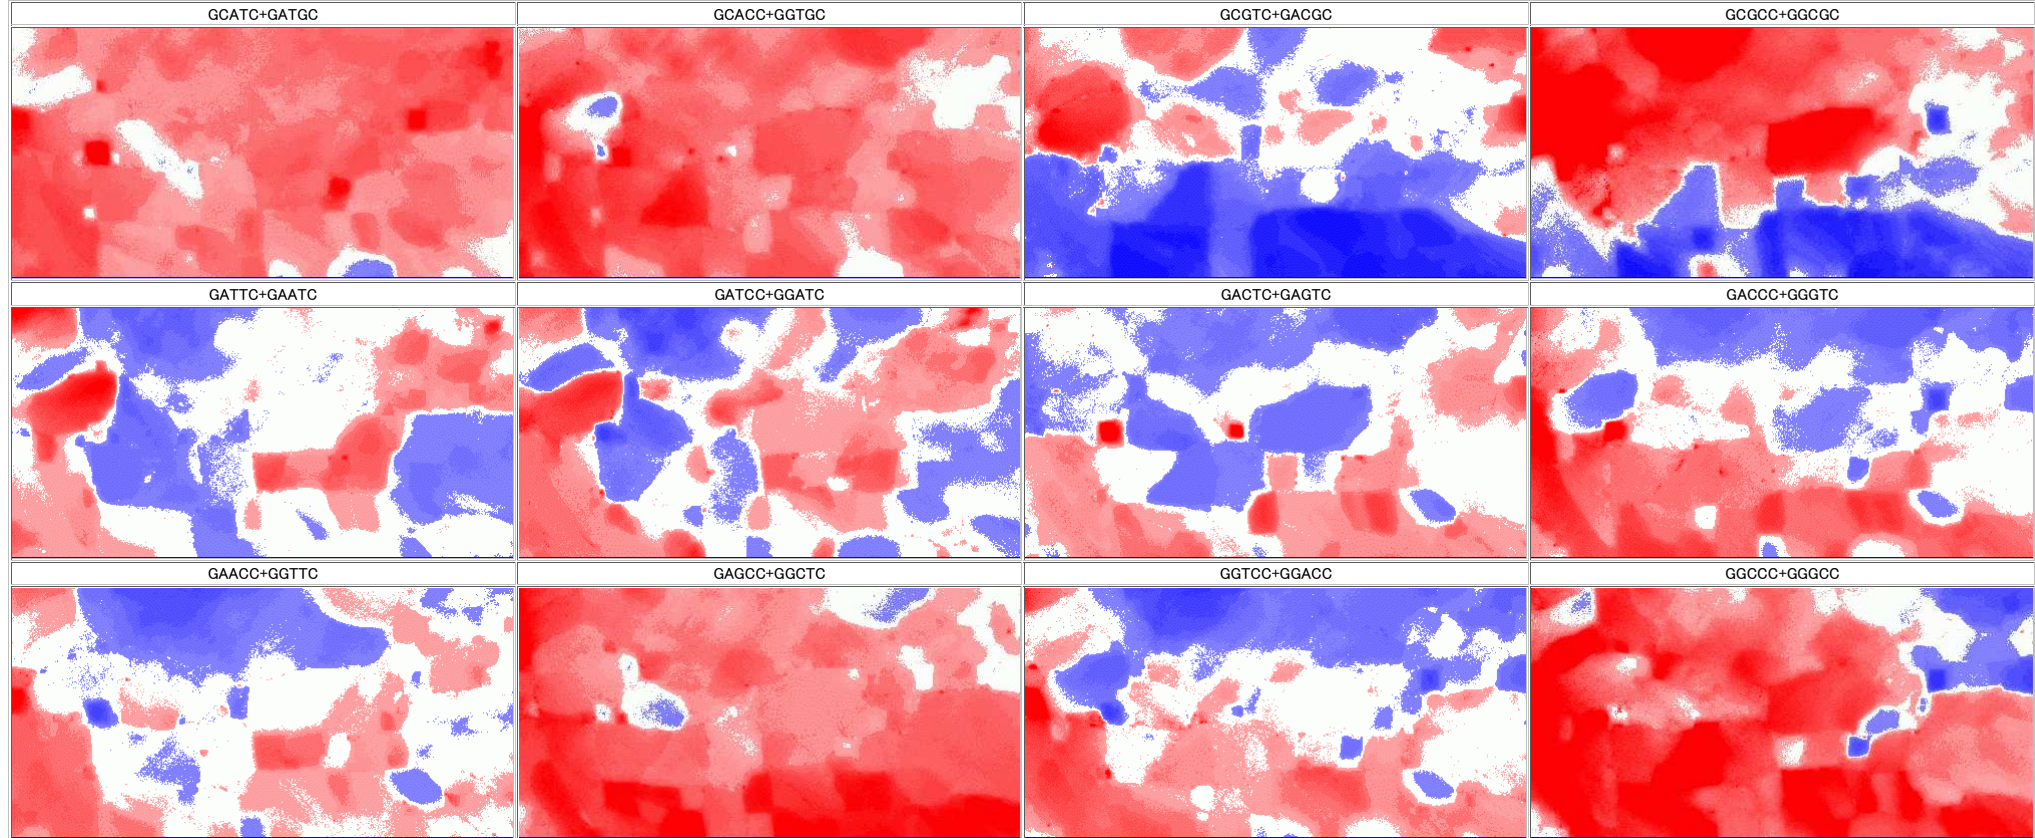

### Supplementary Figure S3.

Level of each pair of complimentary pentanucleotide in 100-kb DegePenta-BLSOM for the overlapping 100-kb sequences of 12 *Drosophila* genomes.

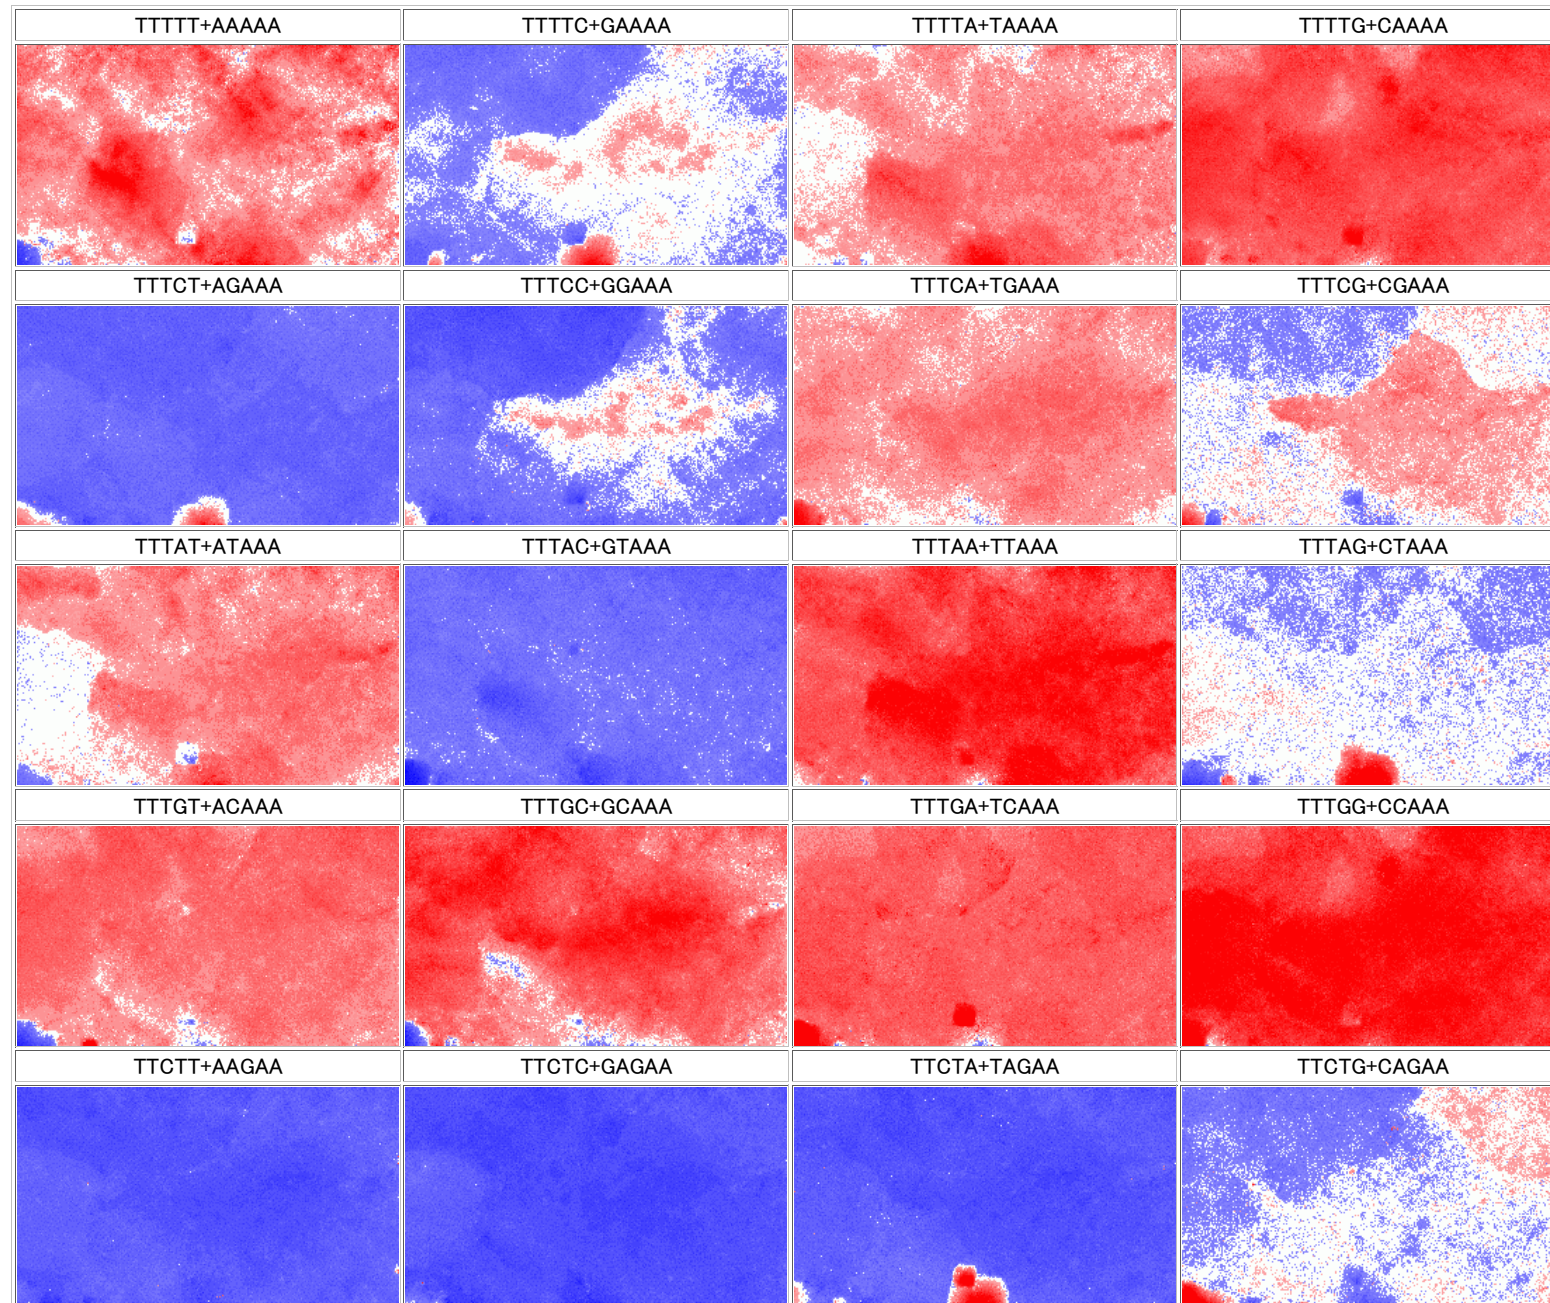

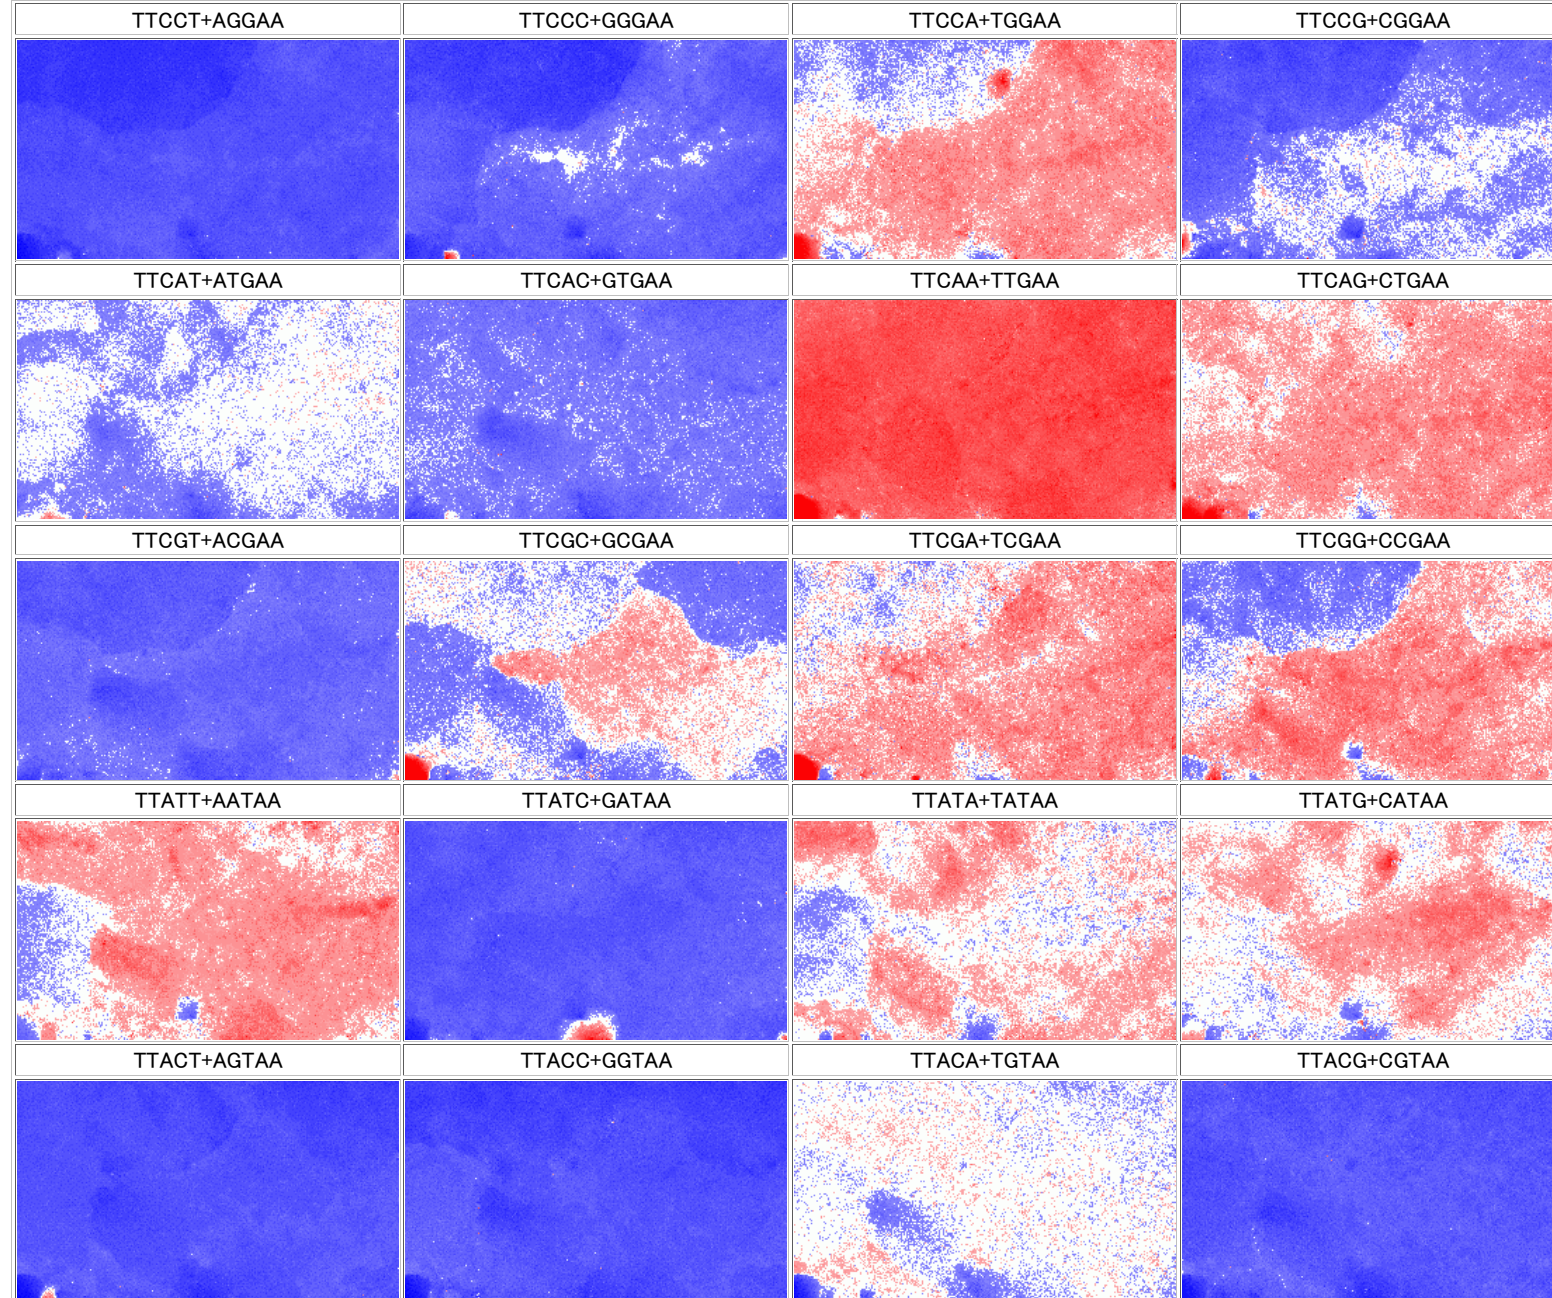

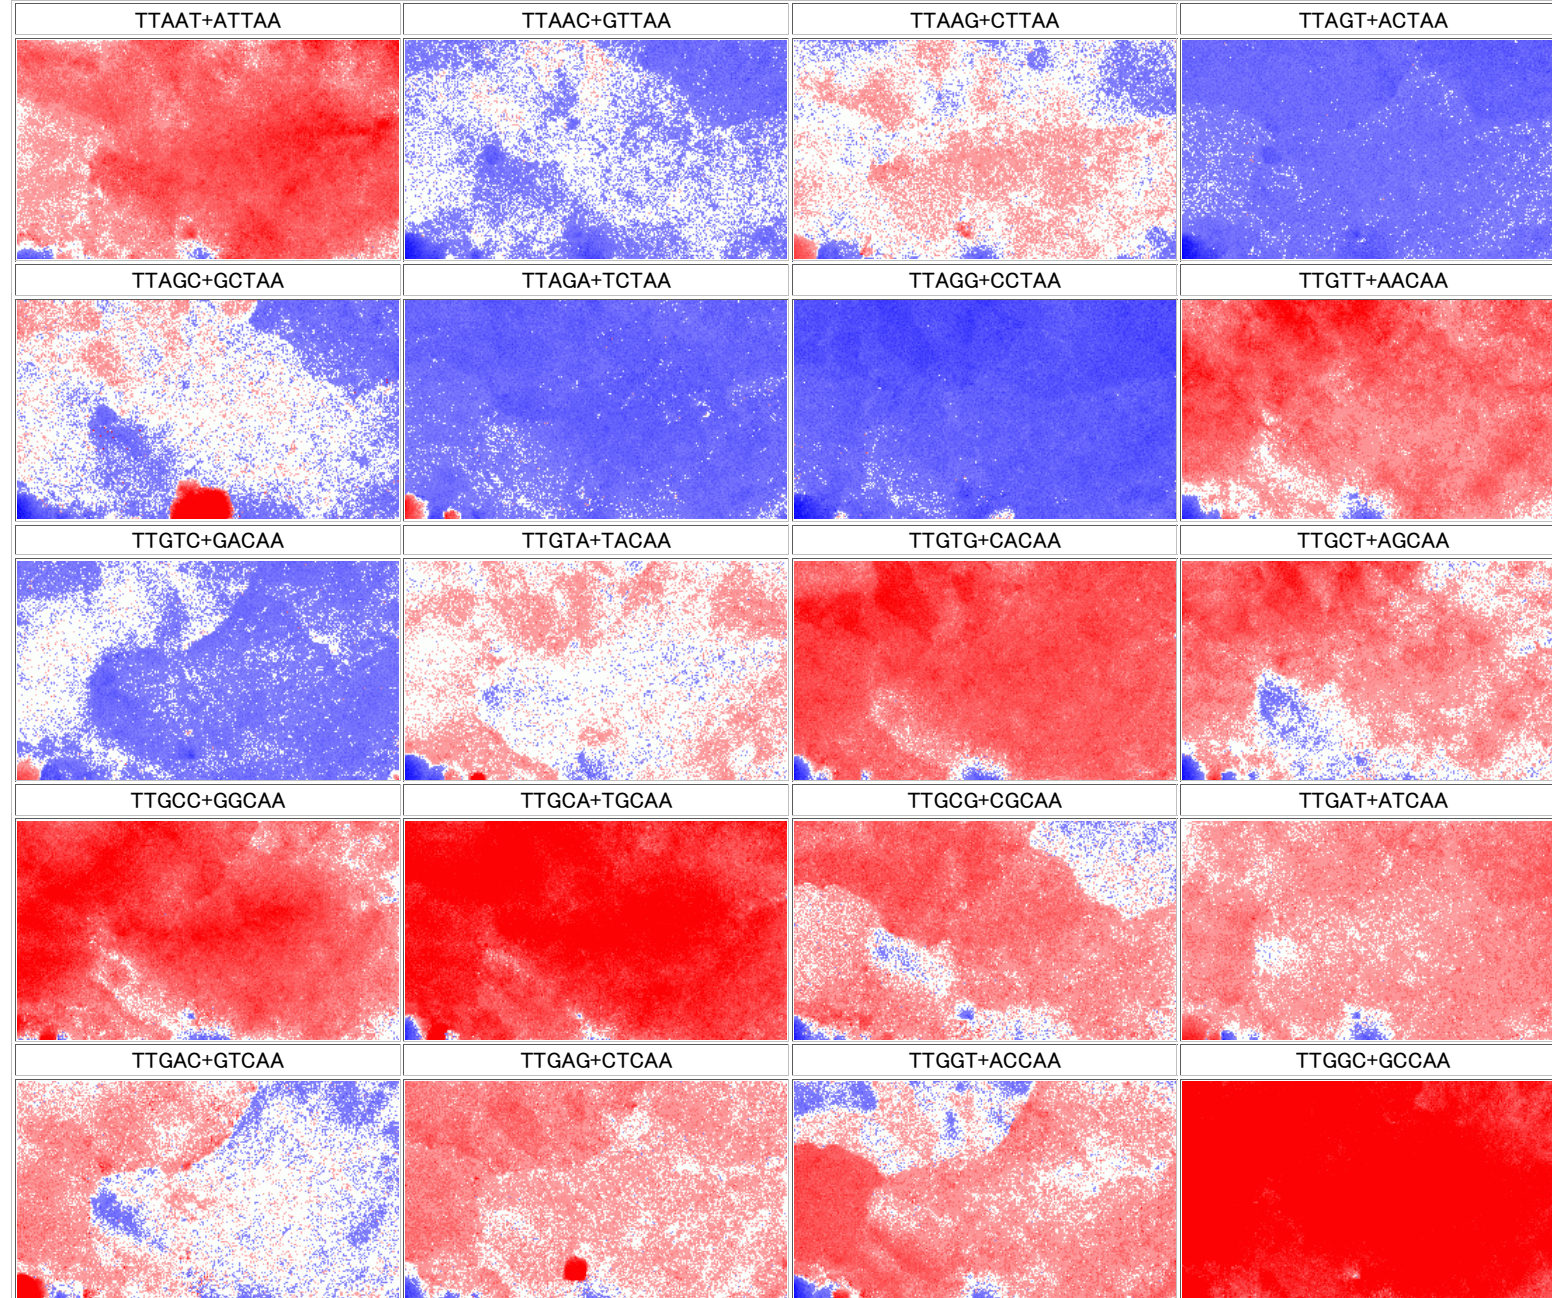

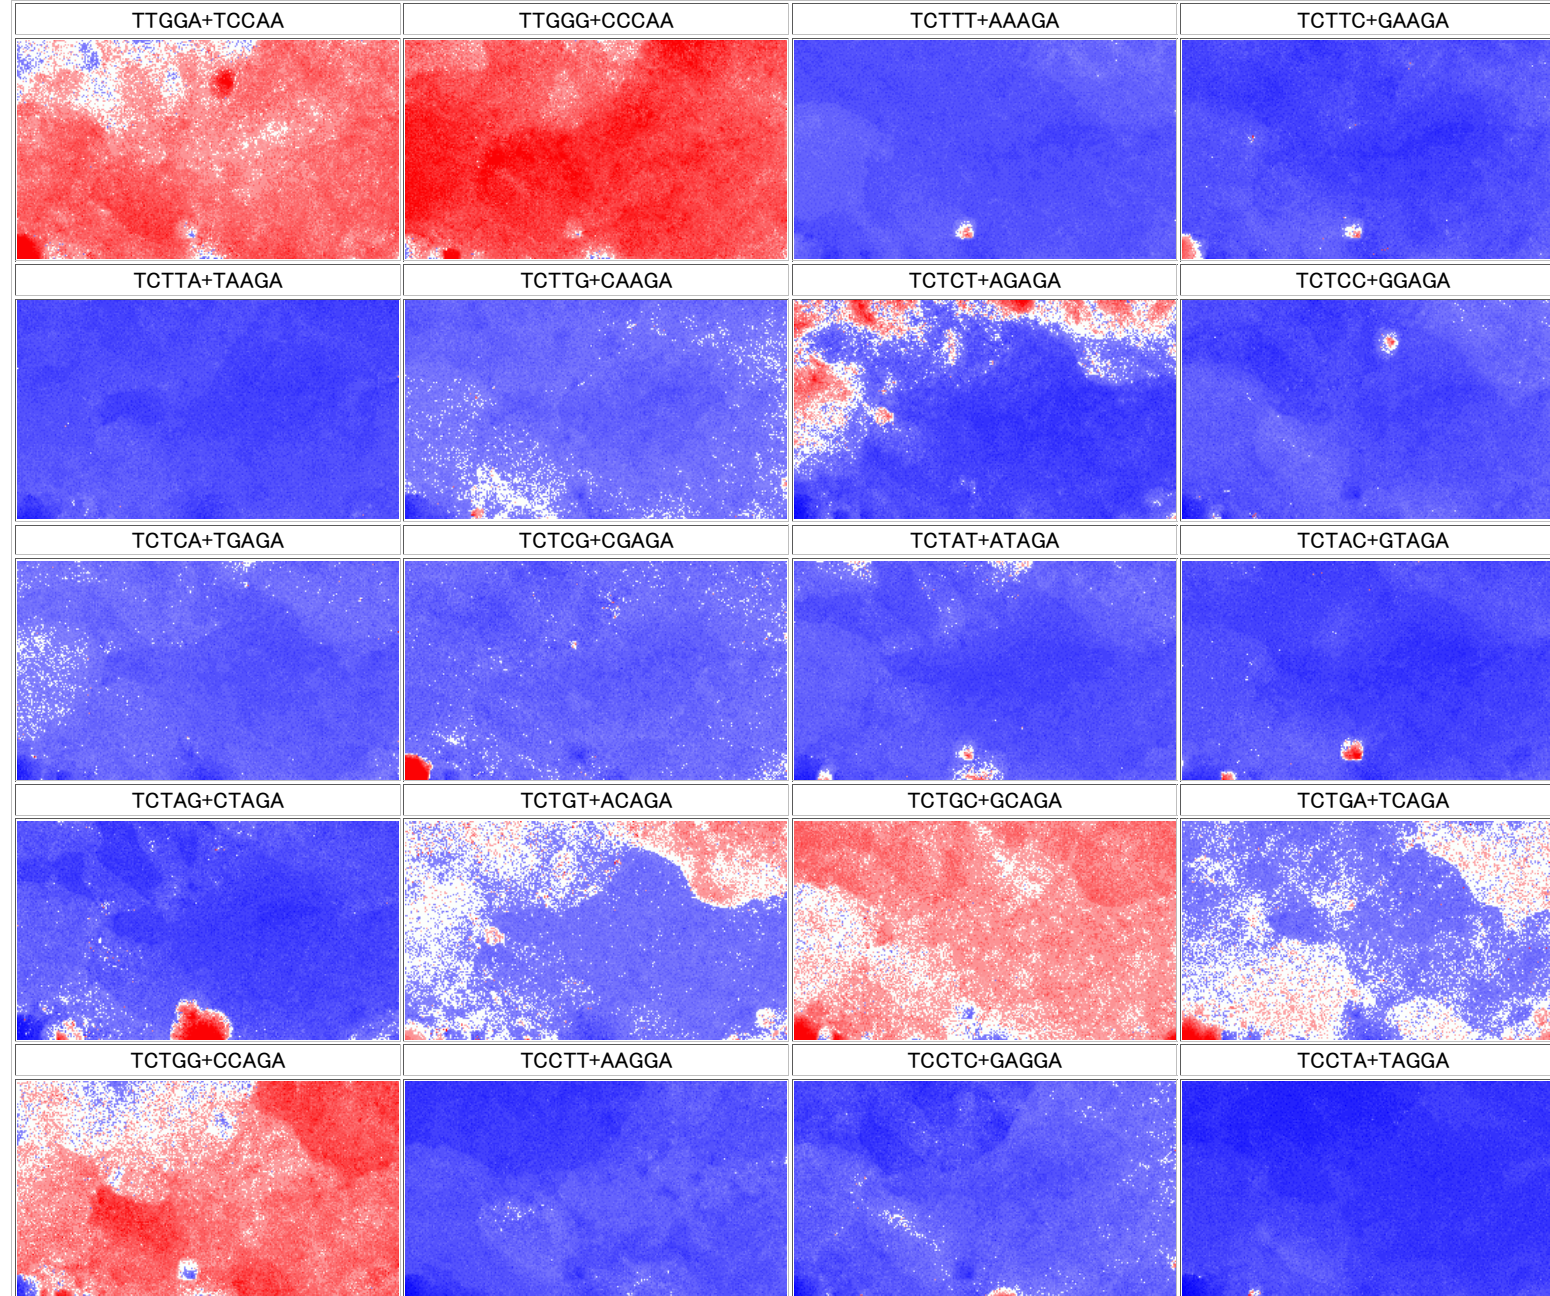

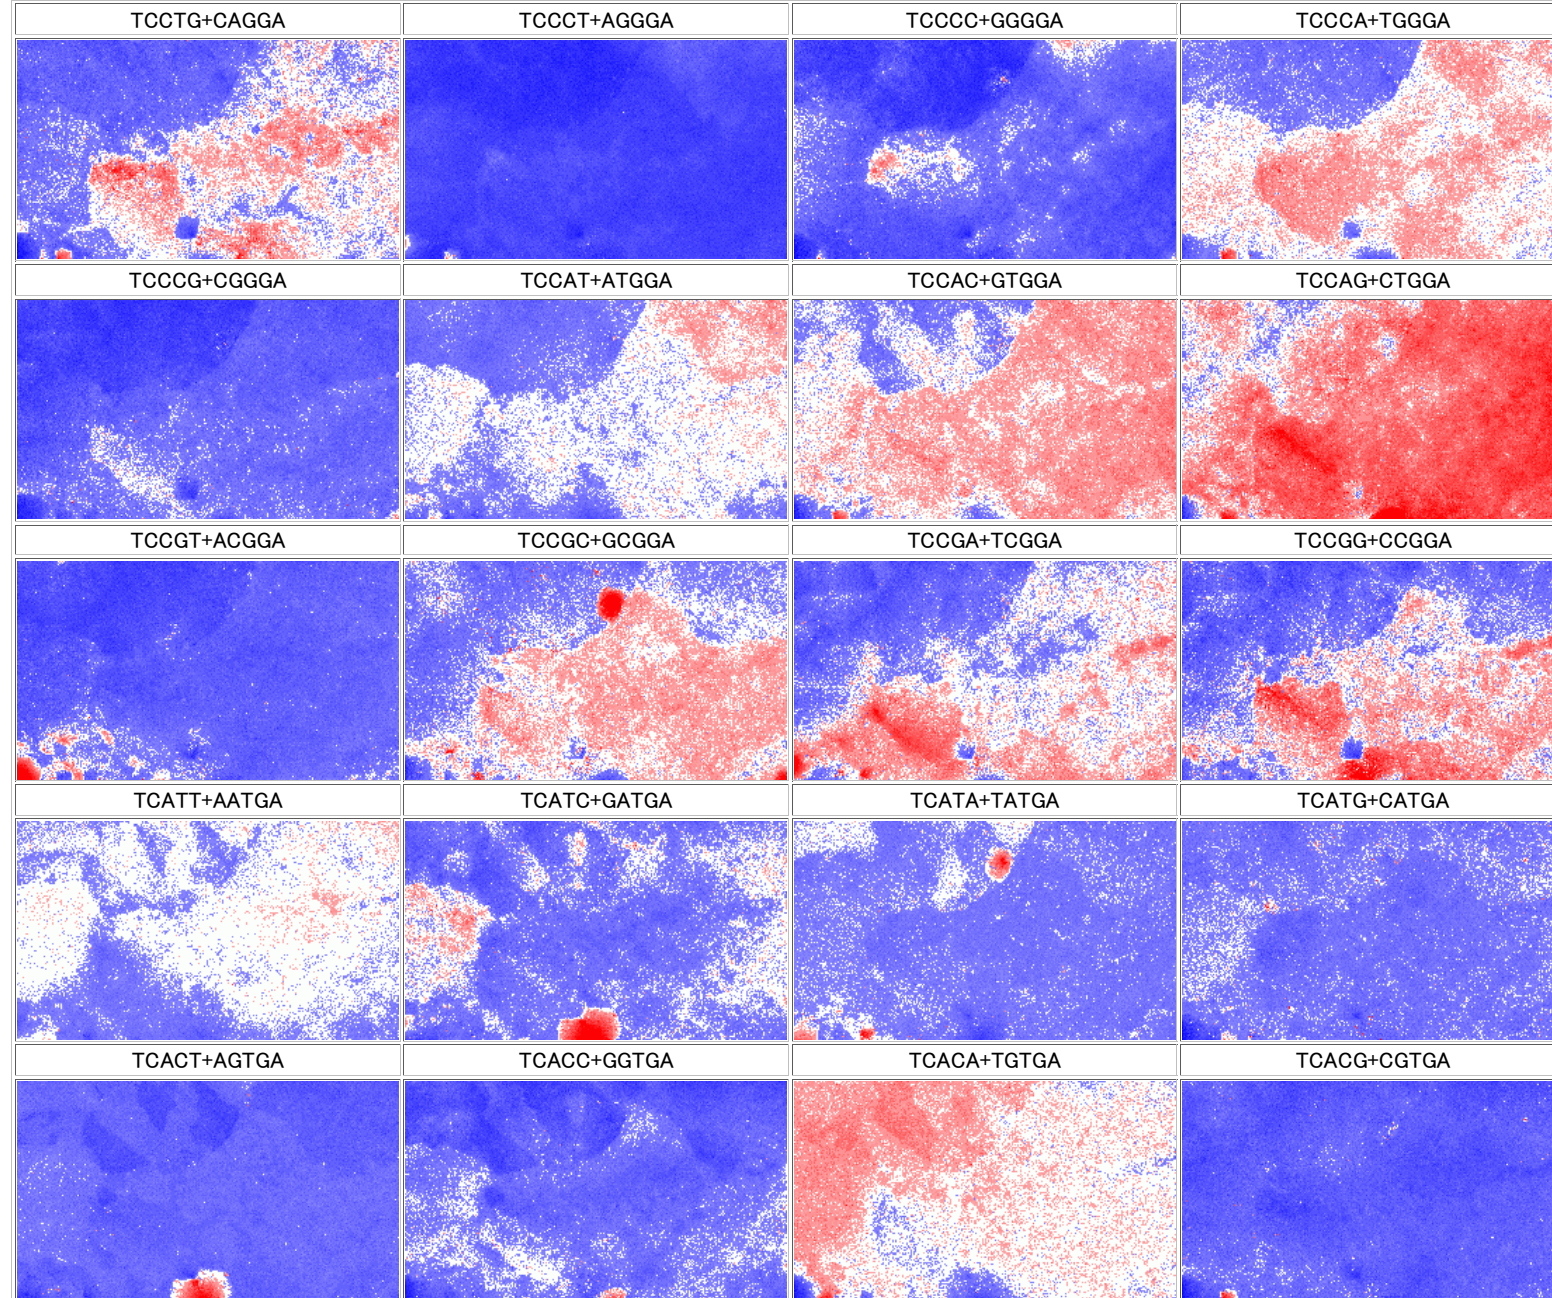

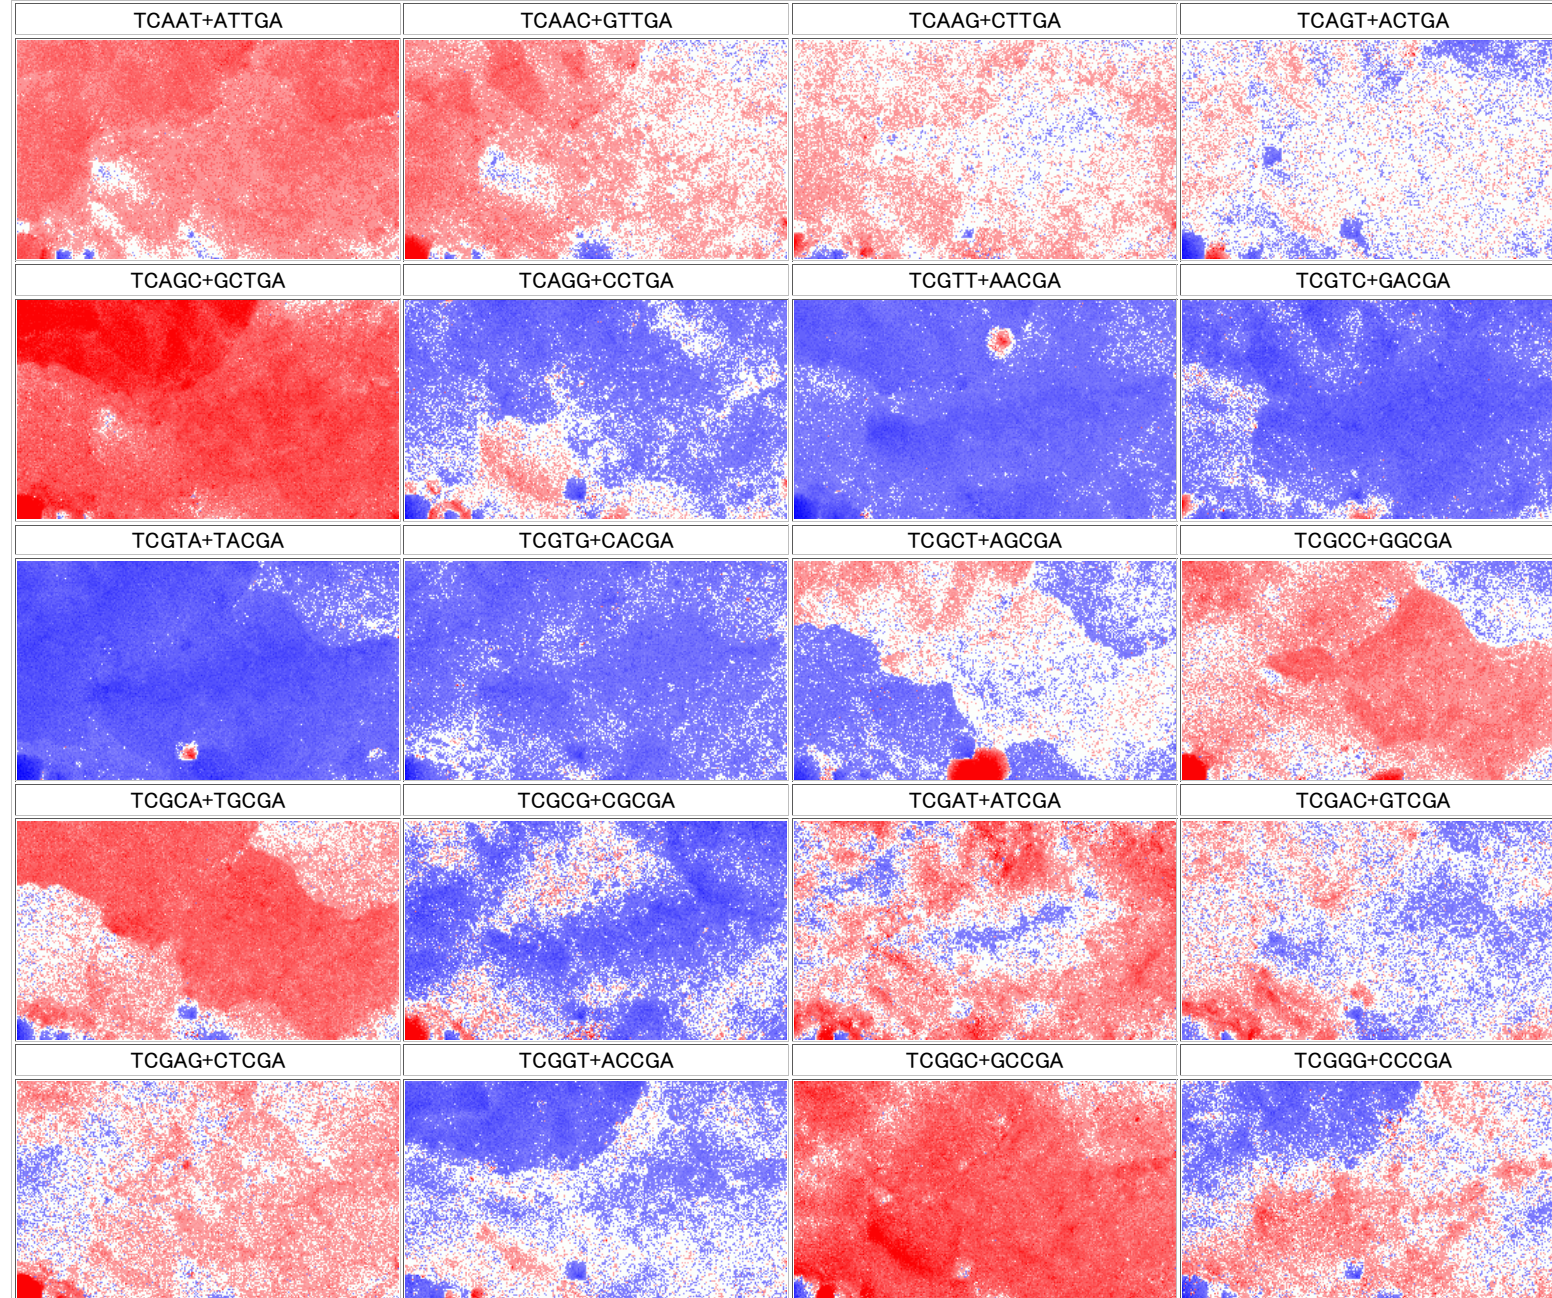

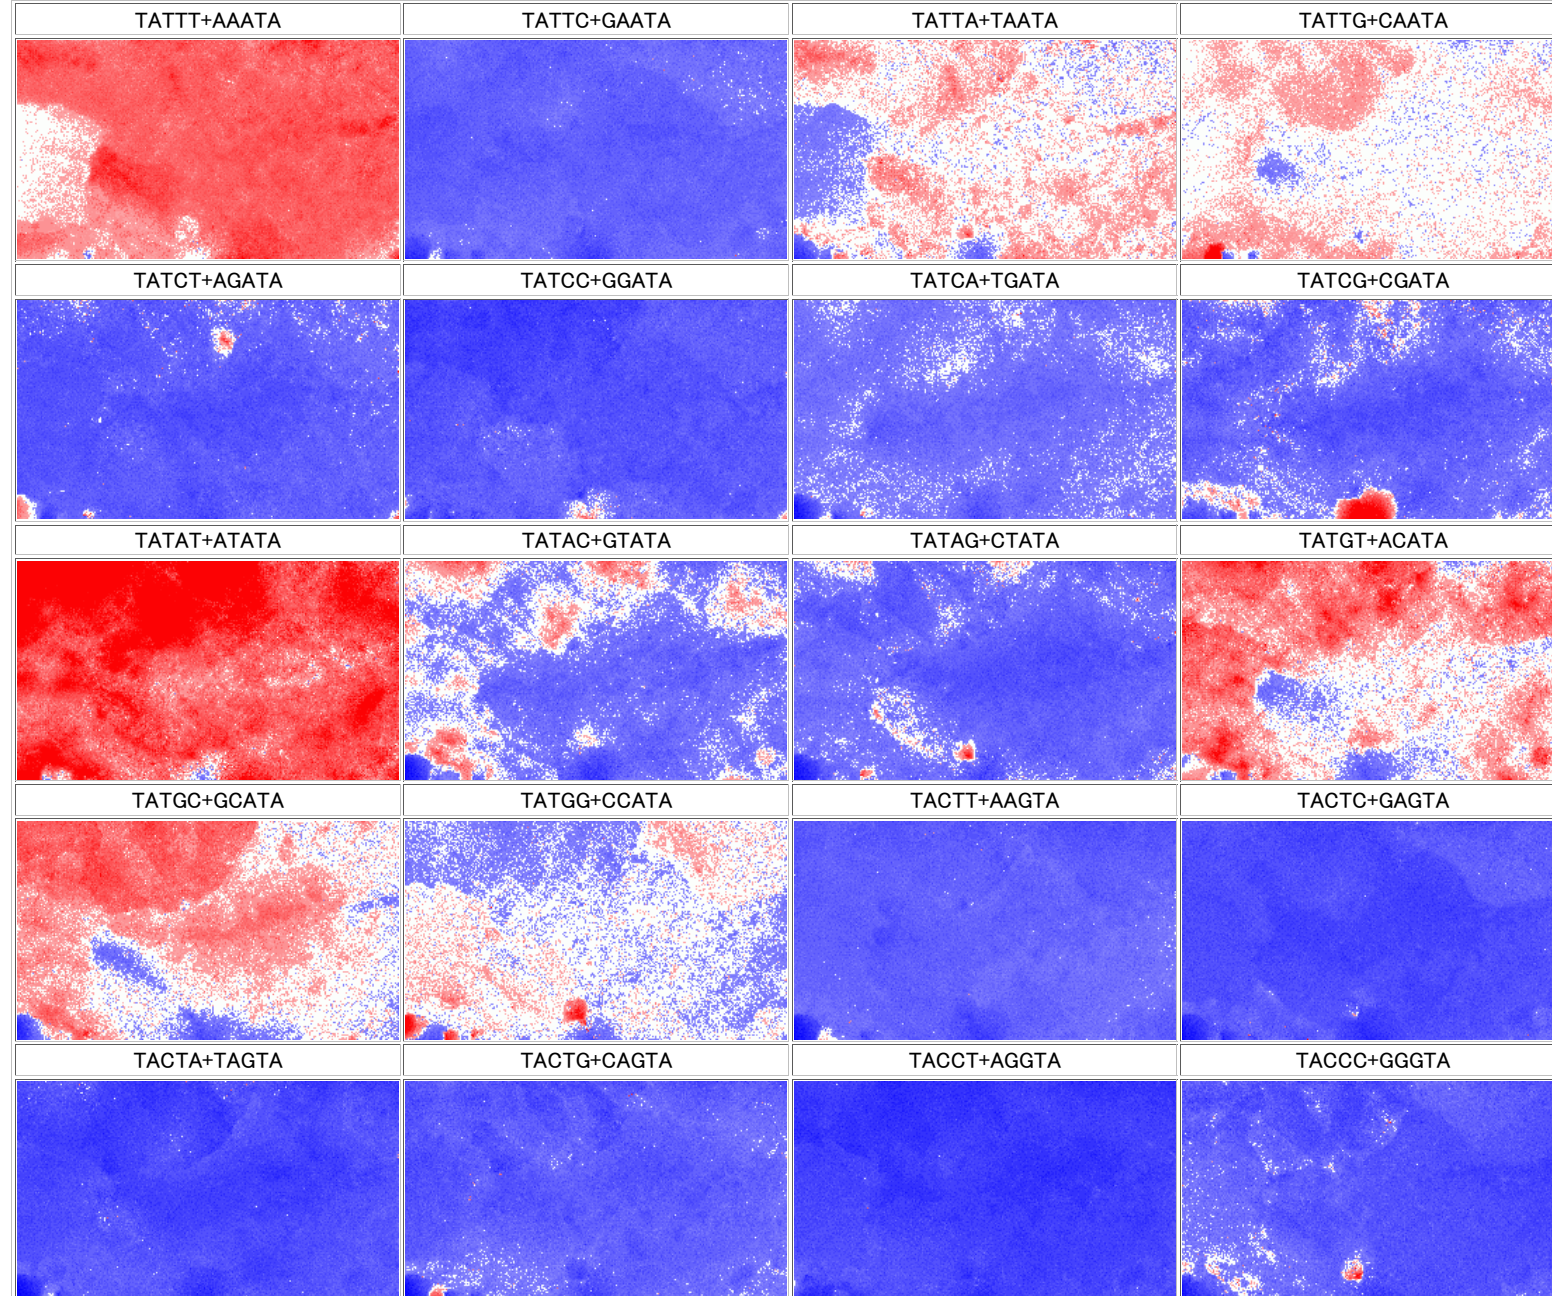



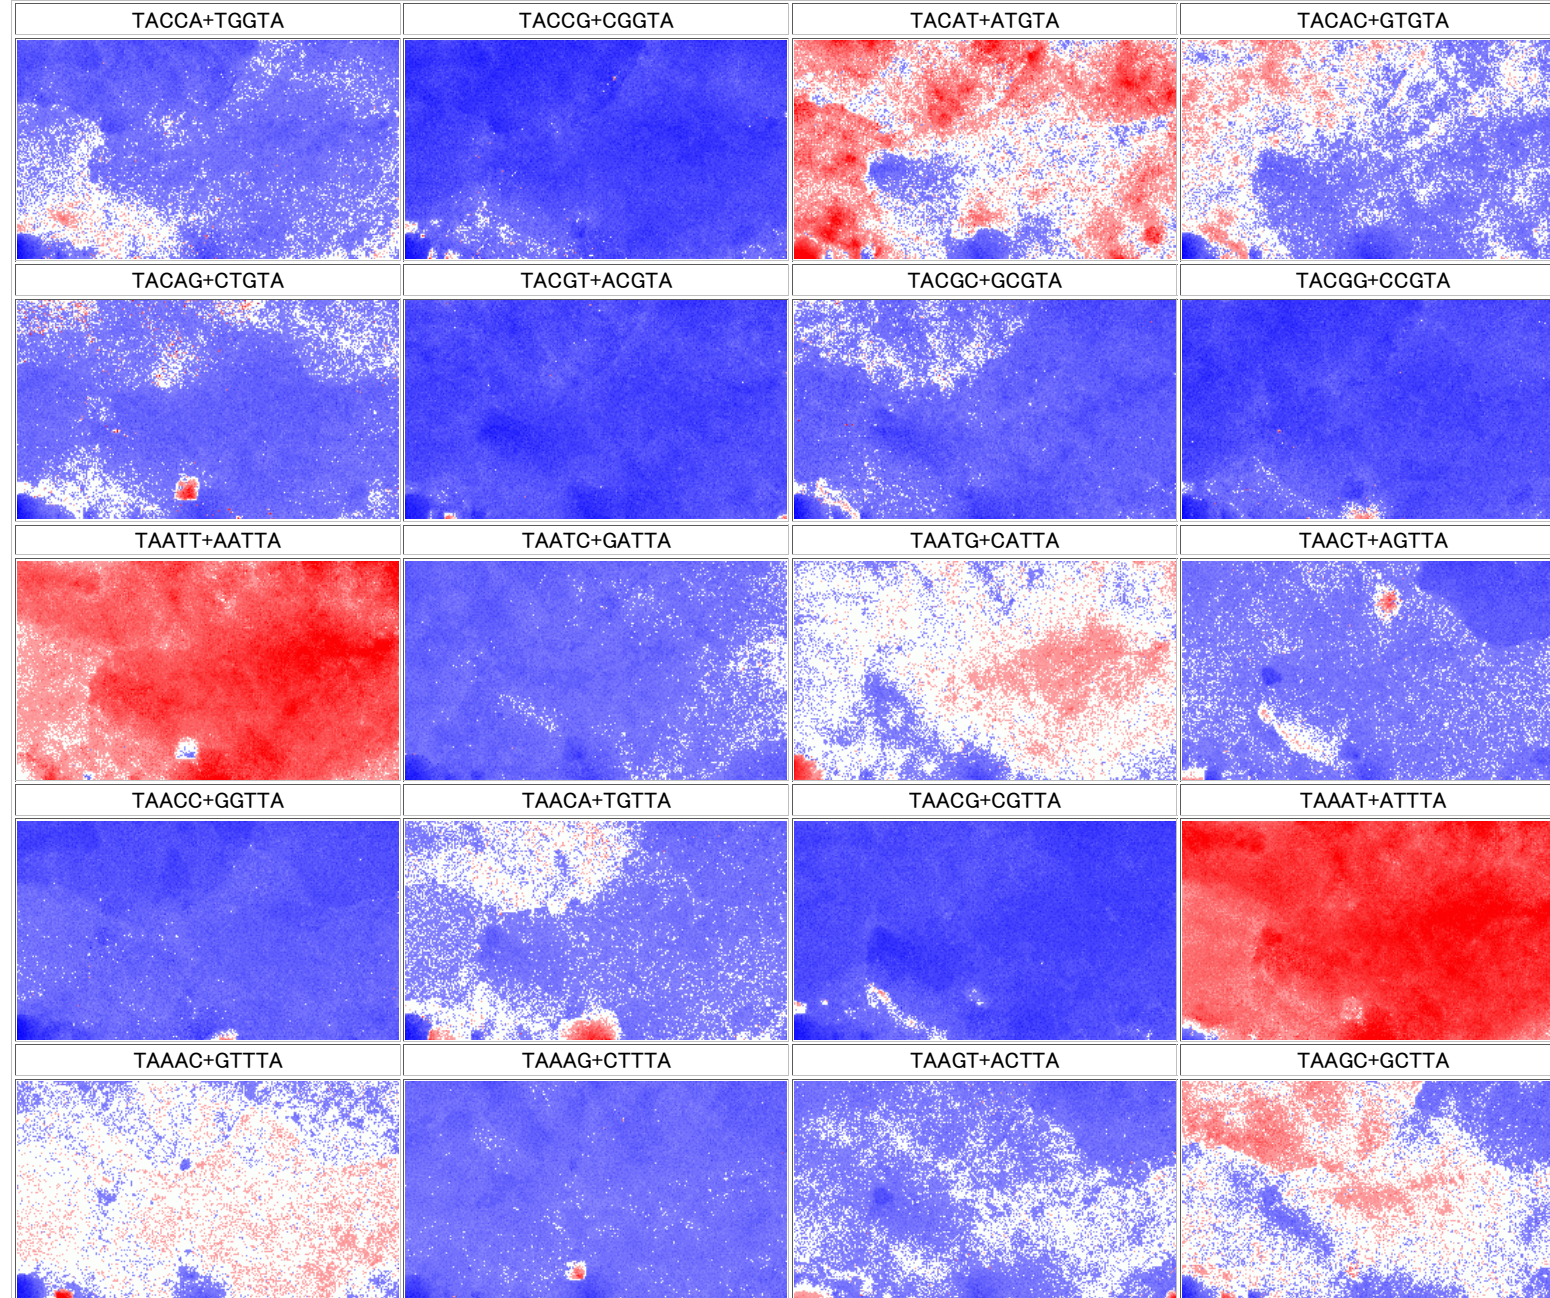

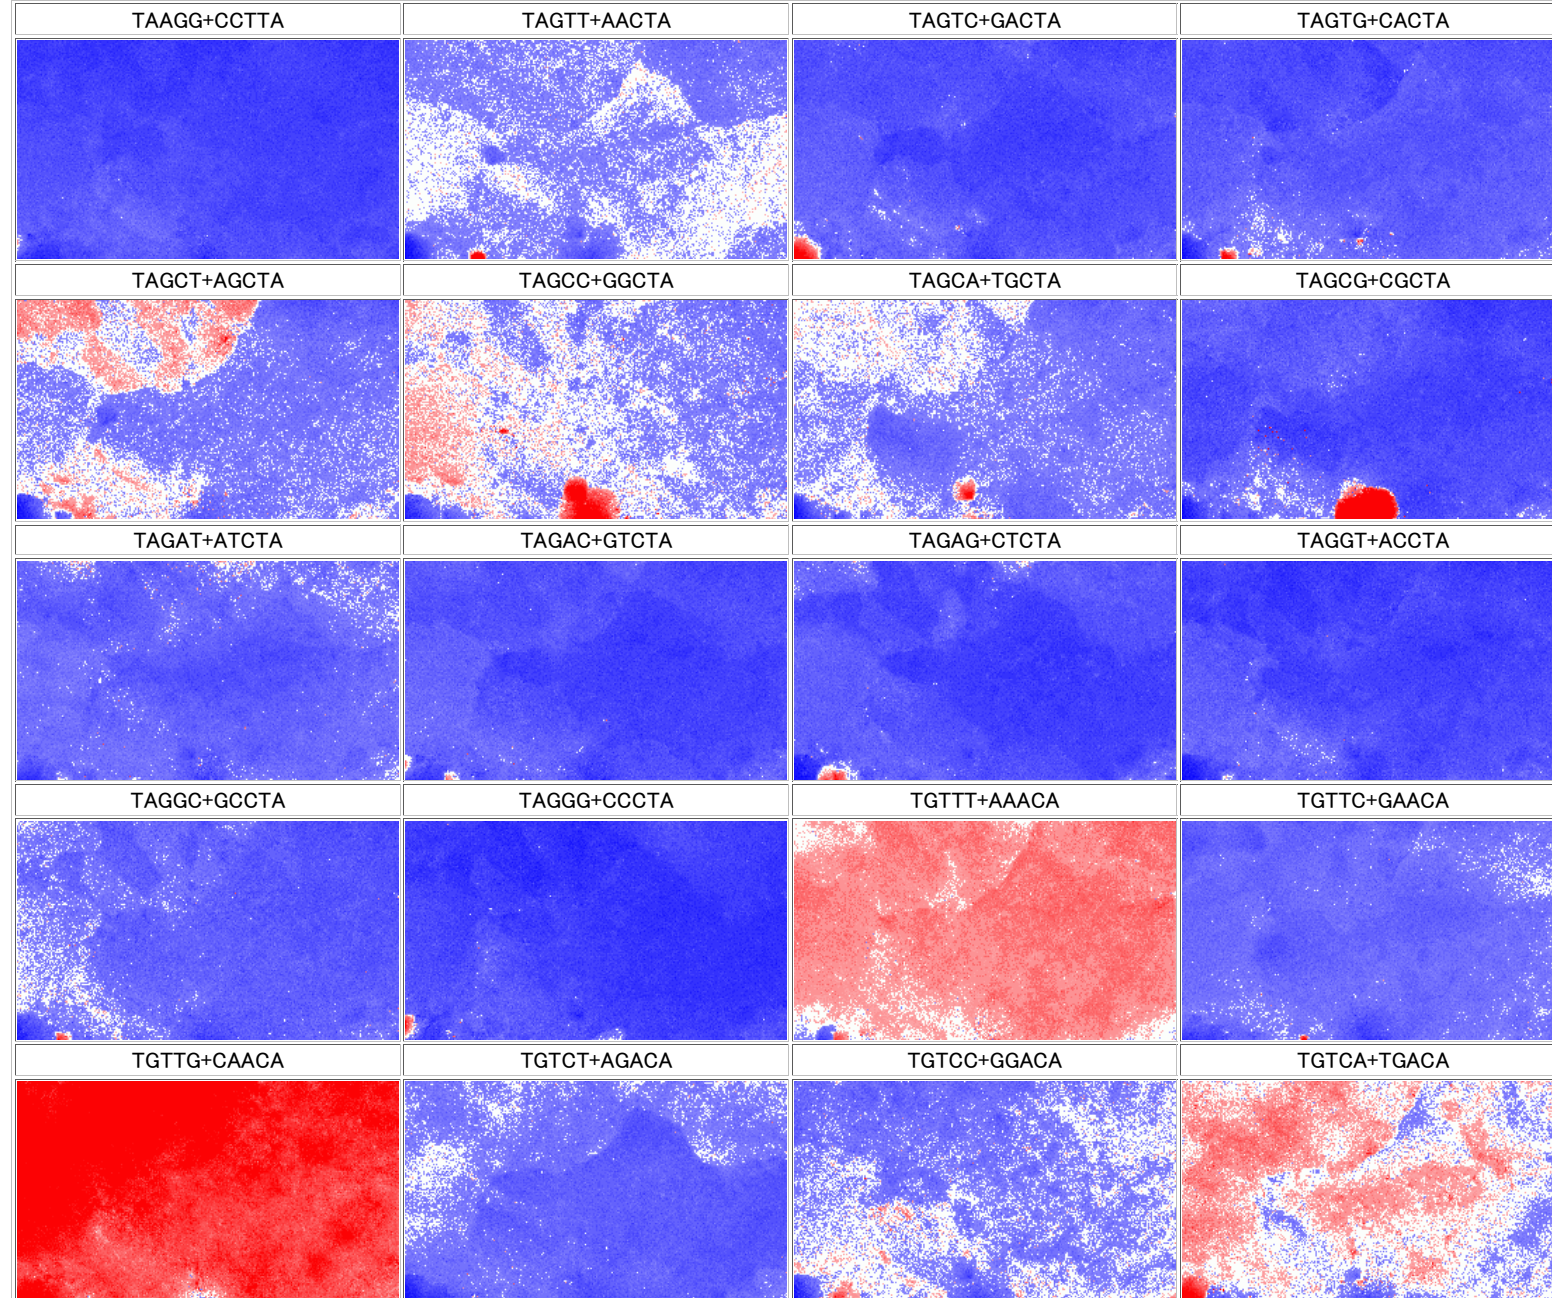

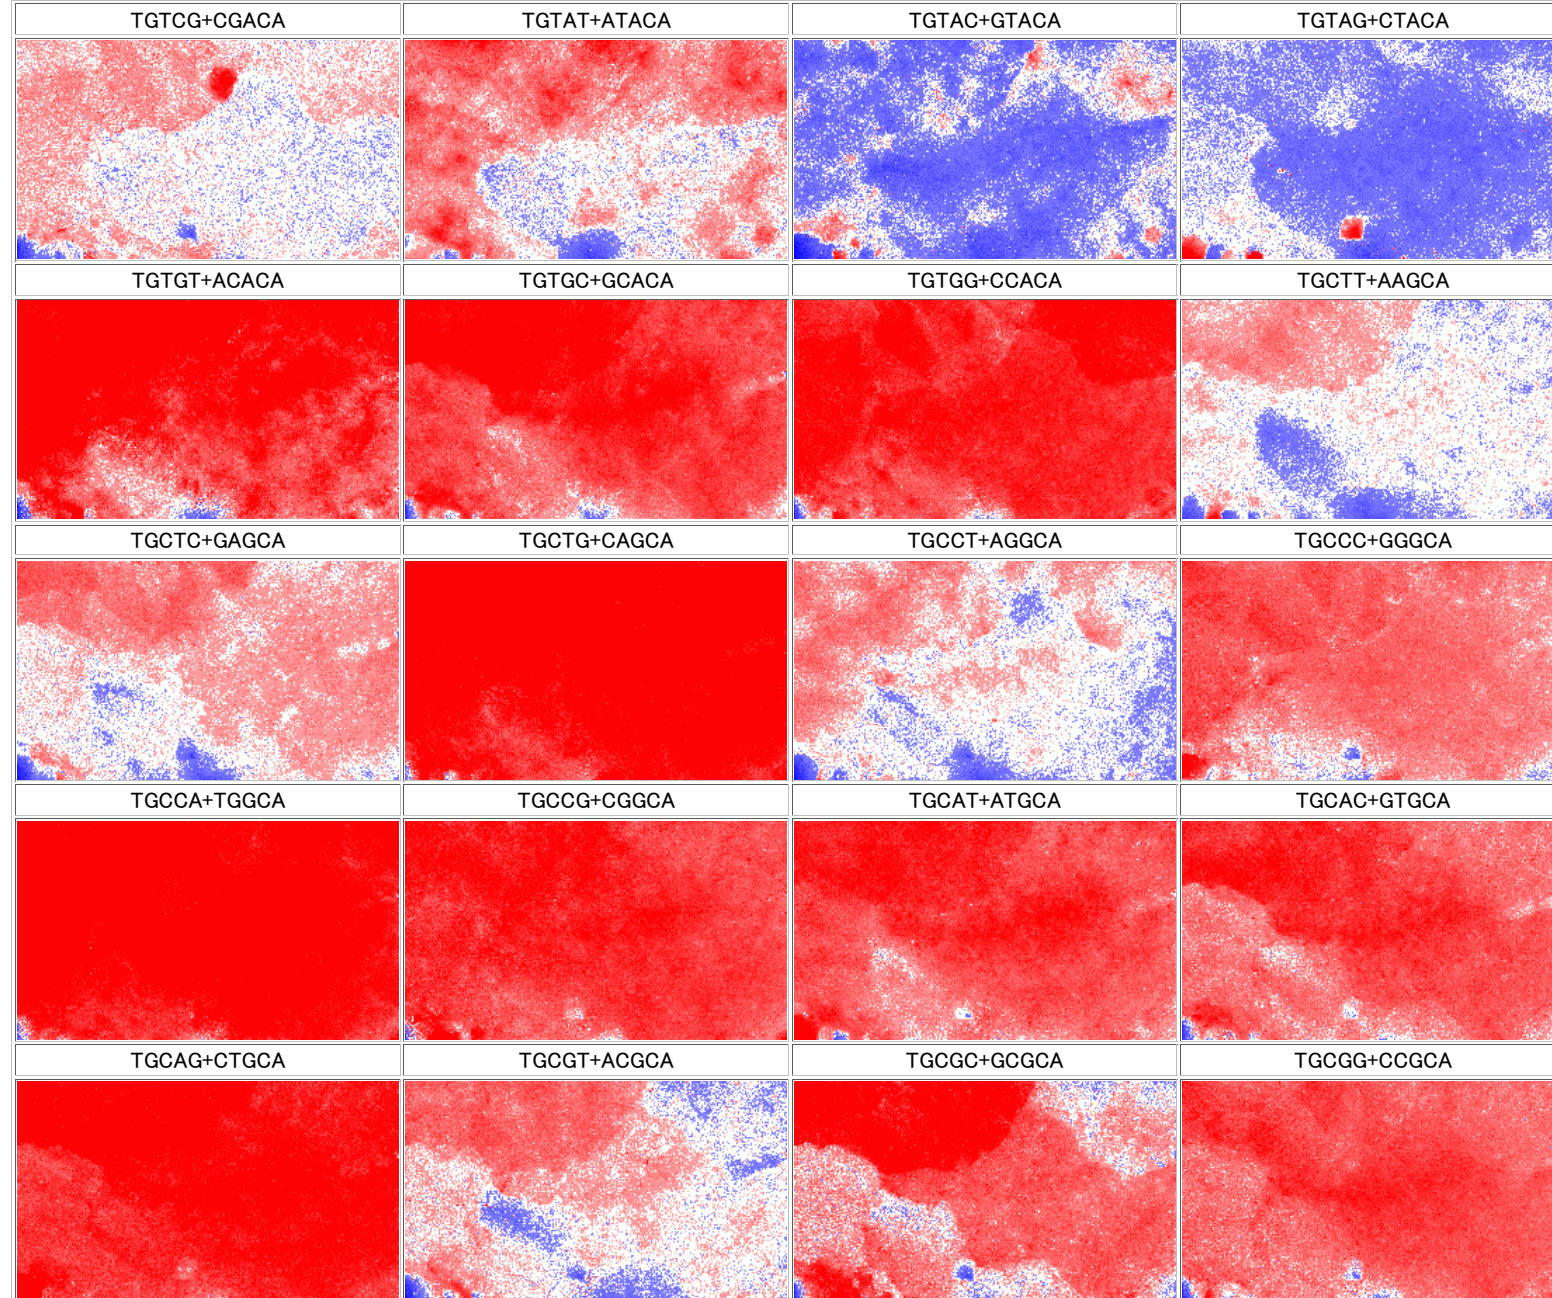

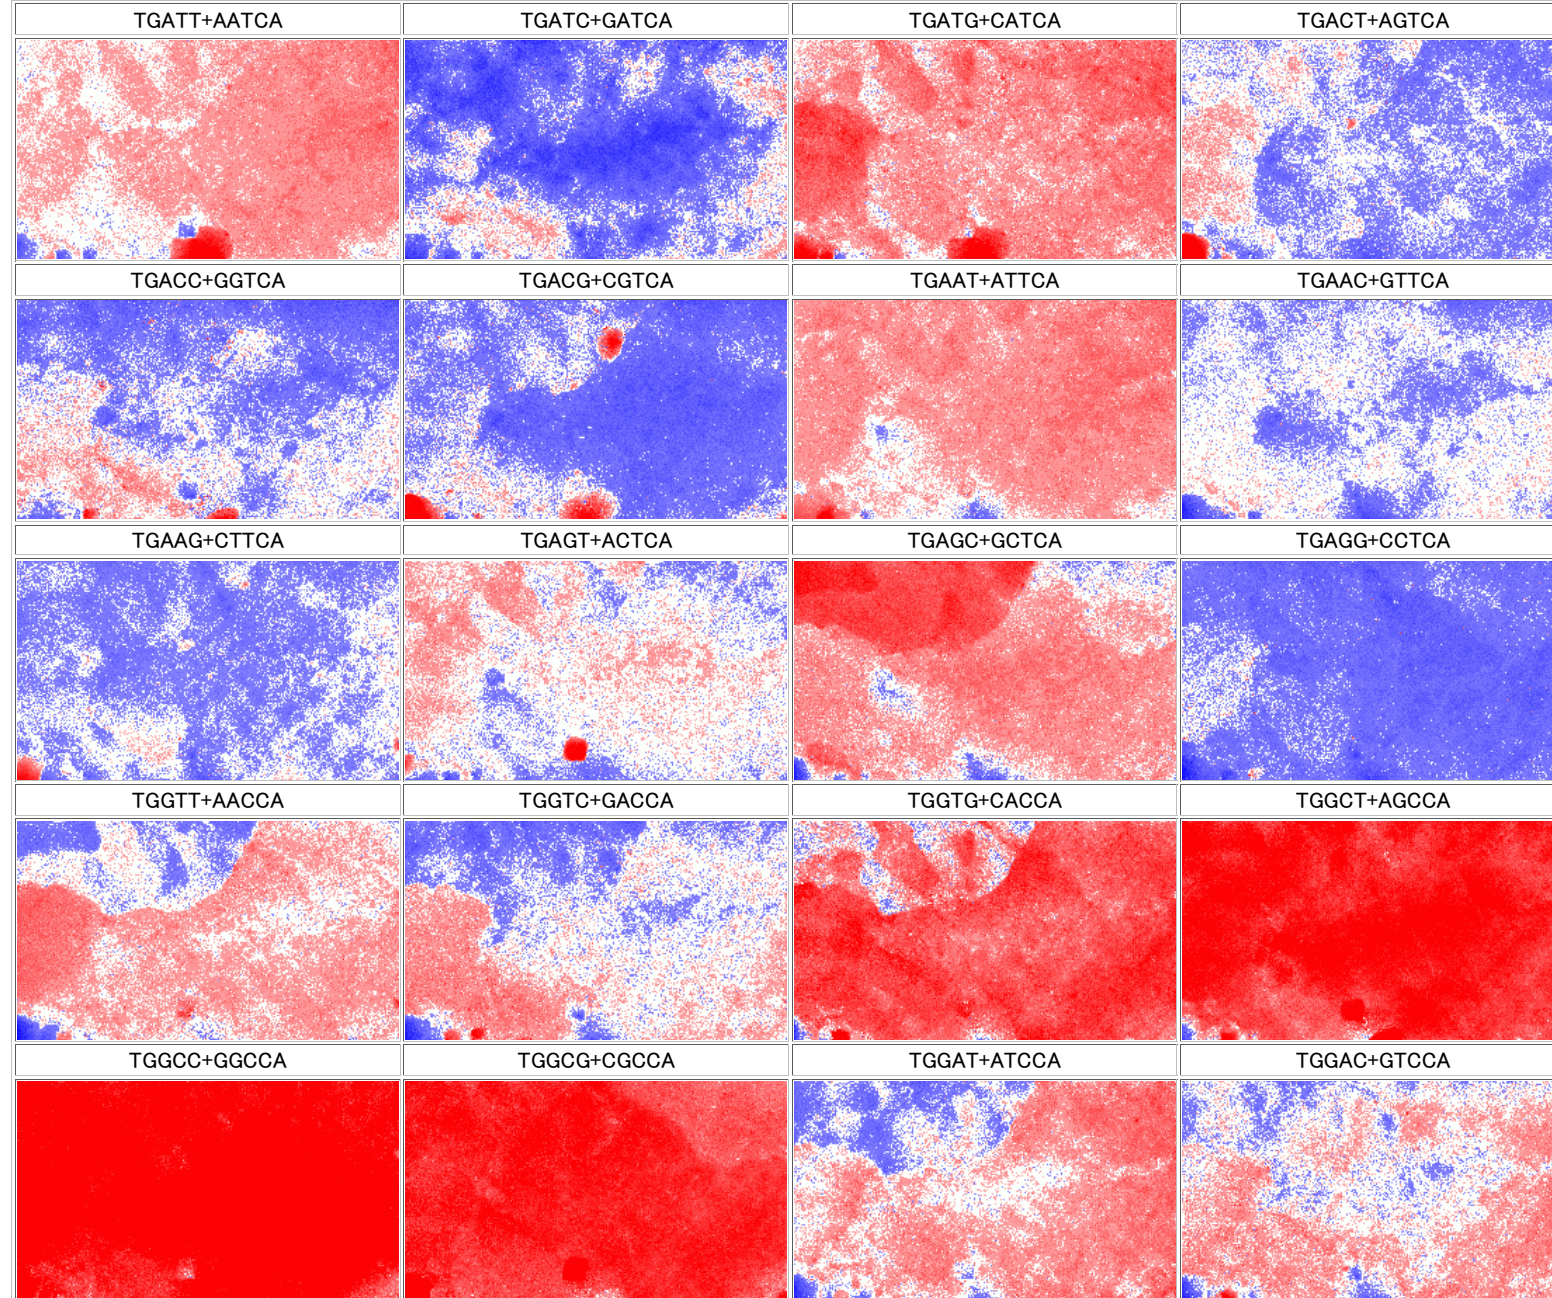

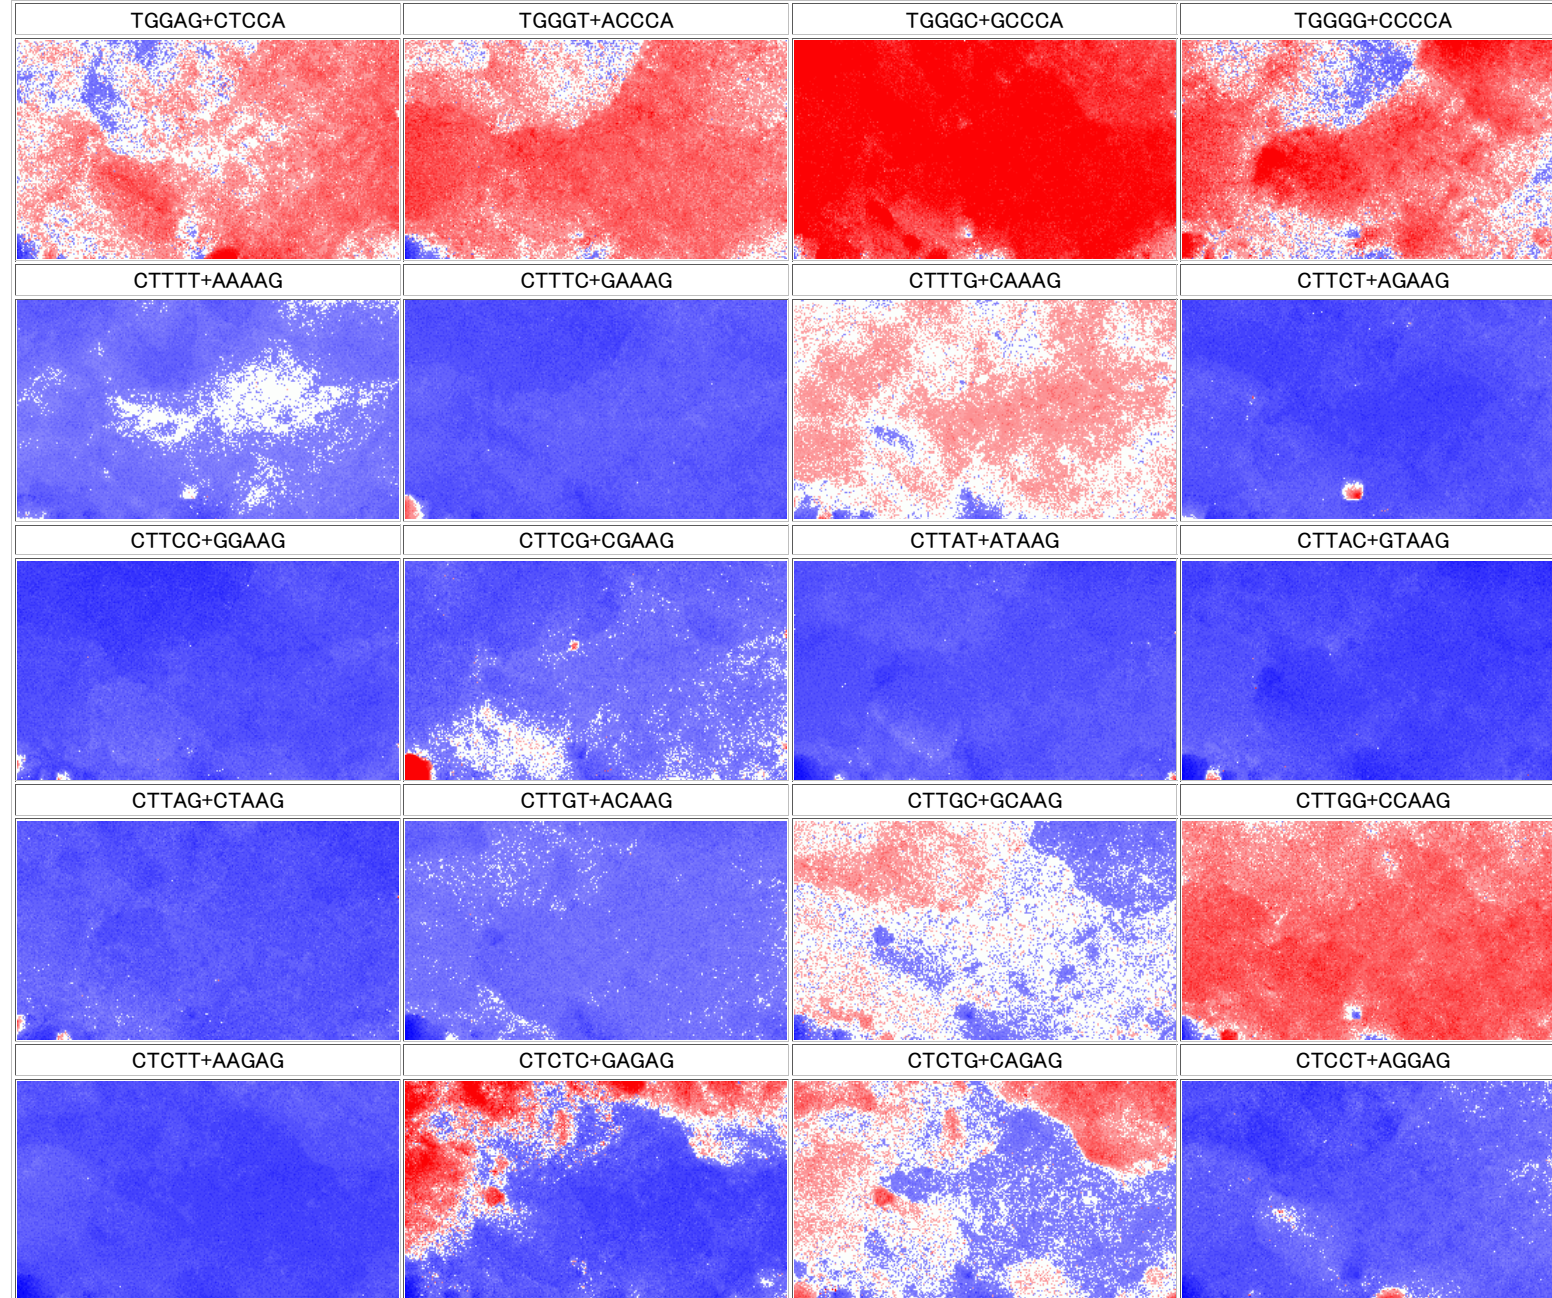

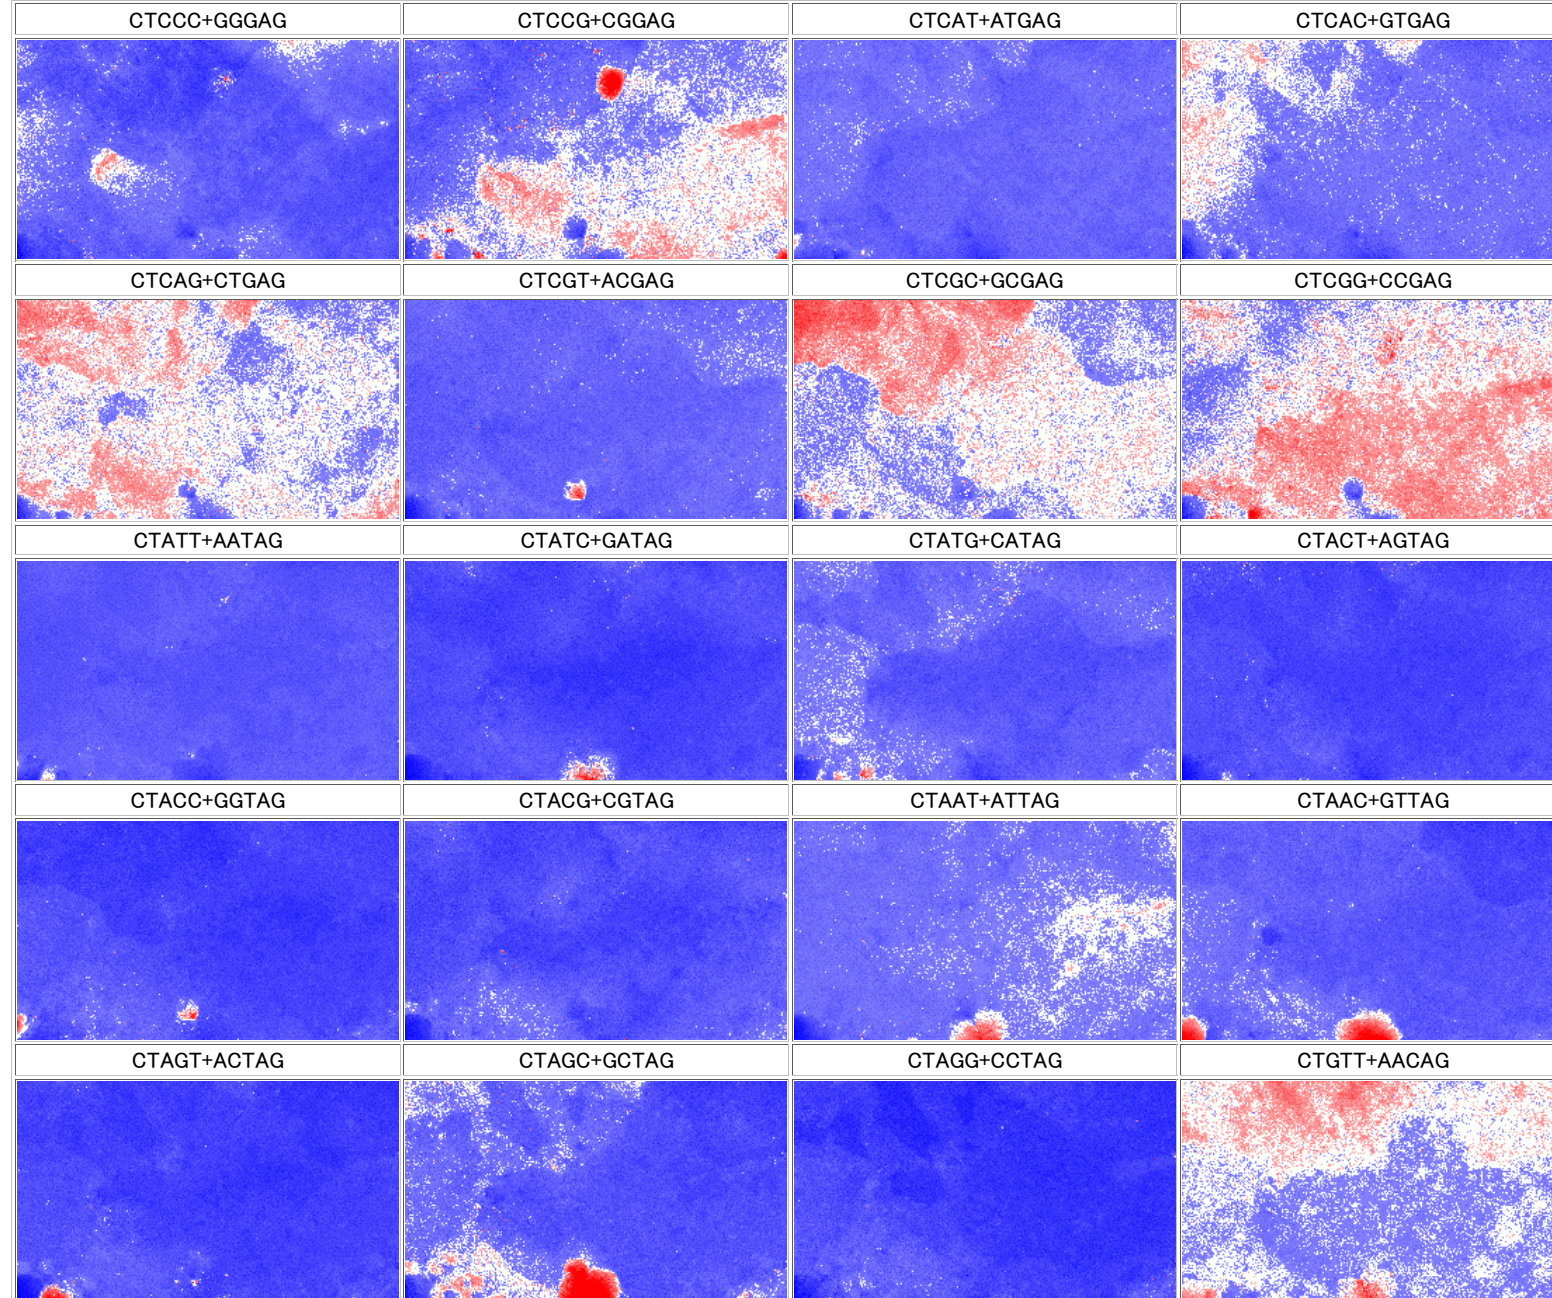

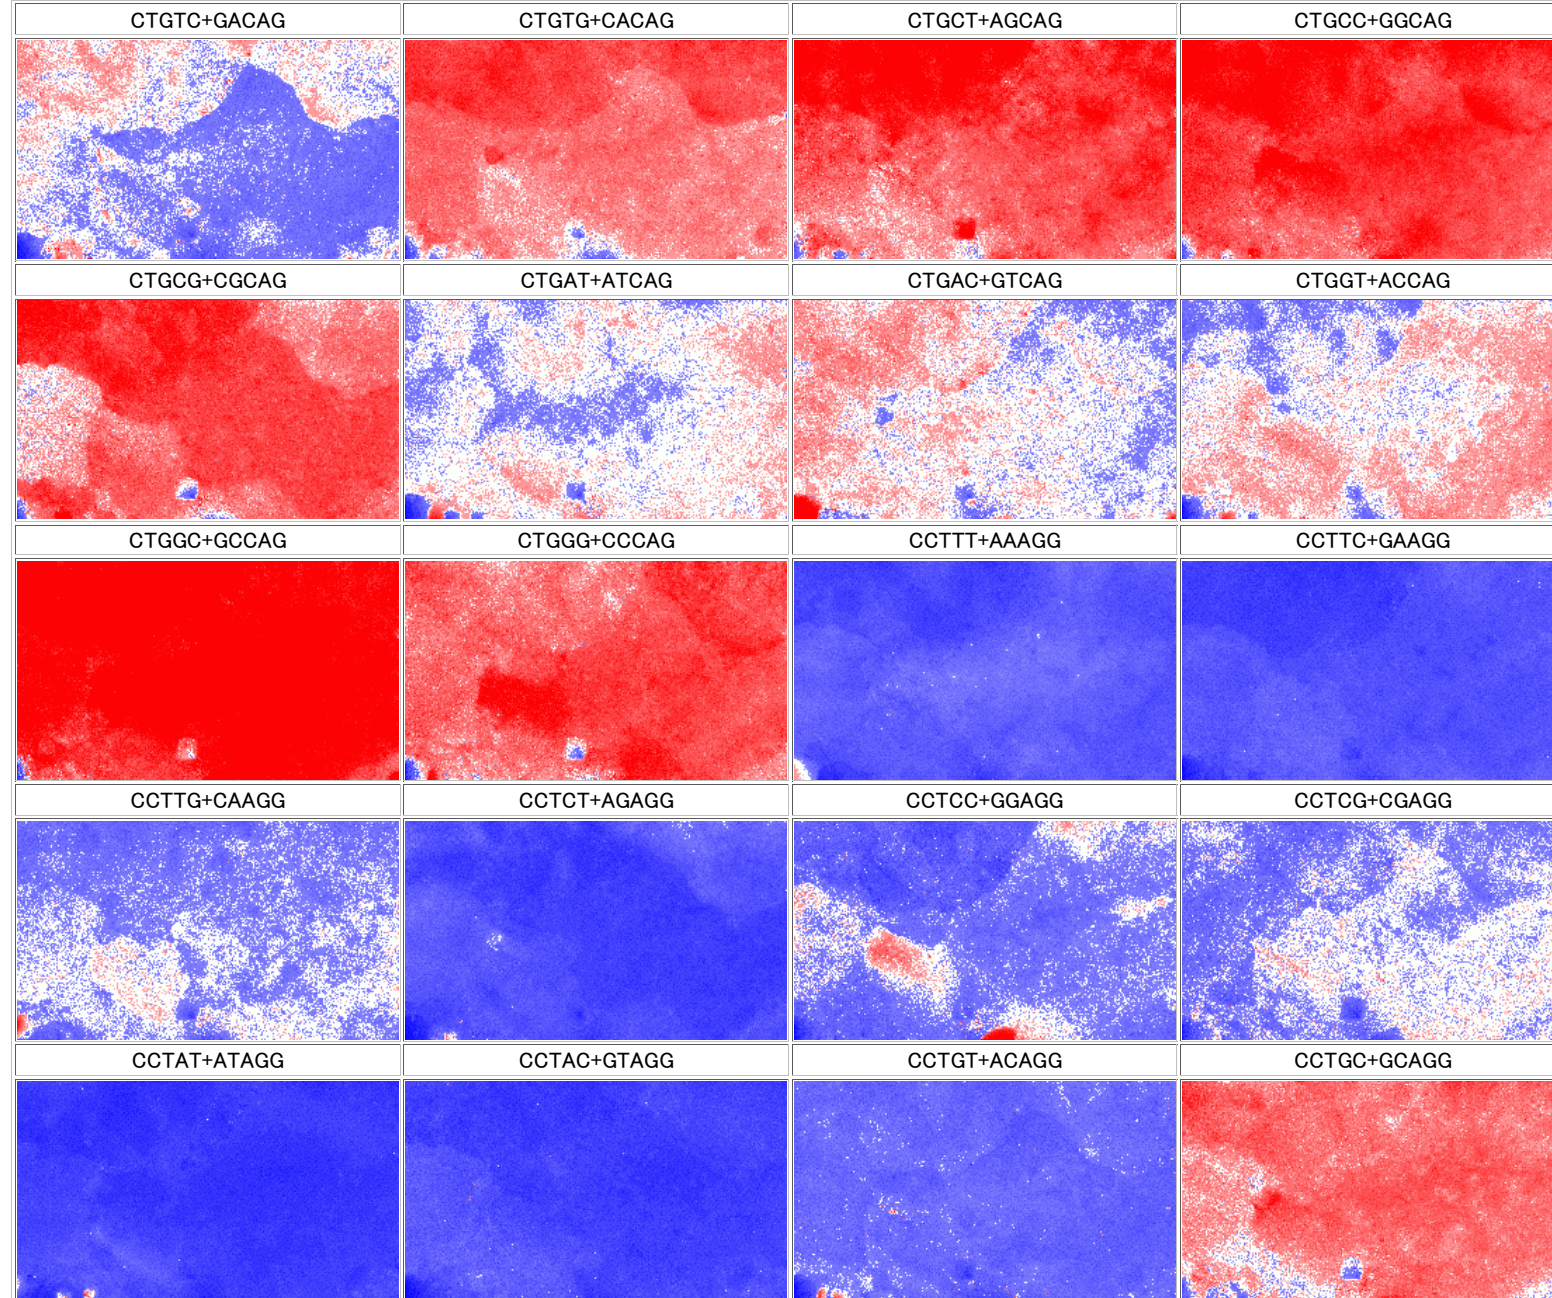

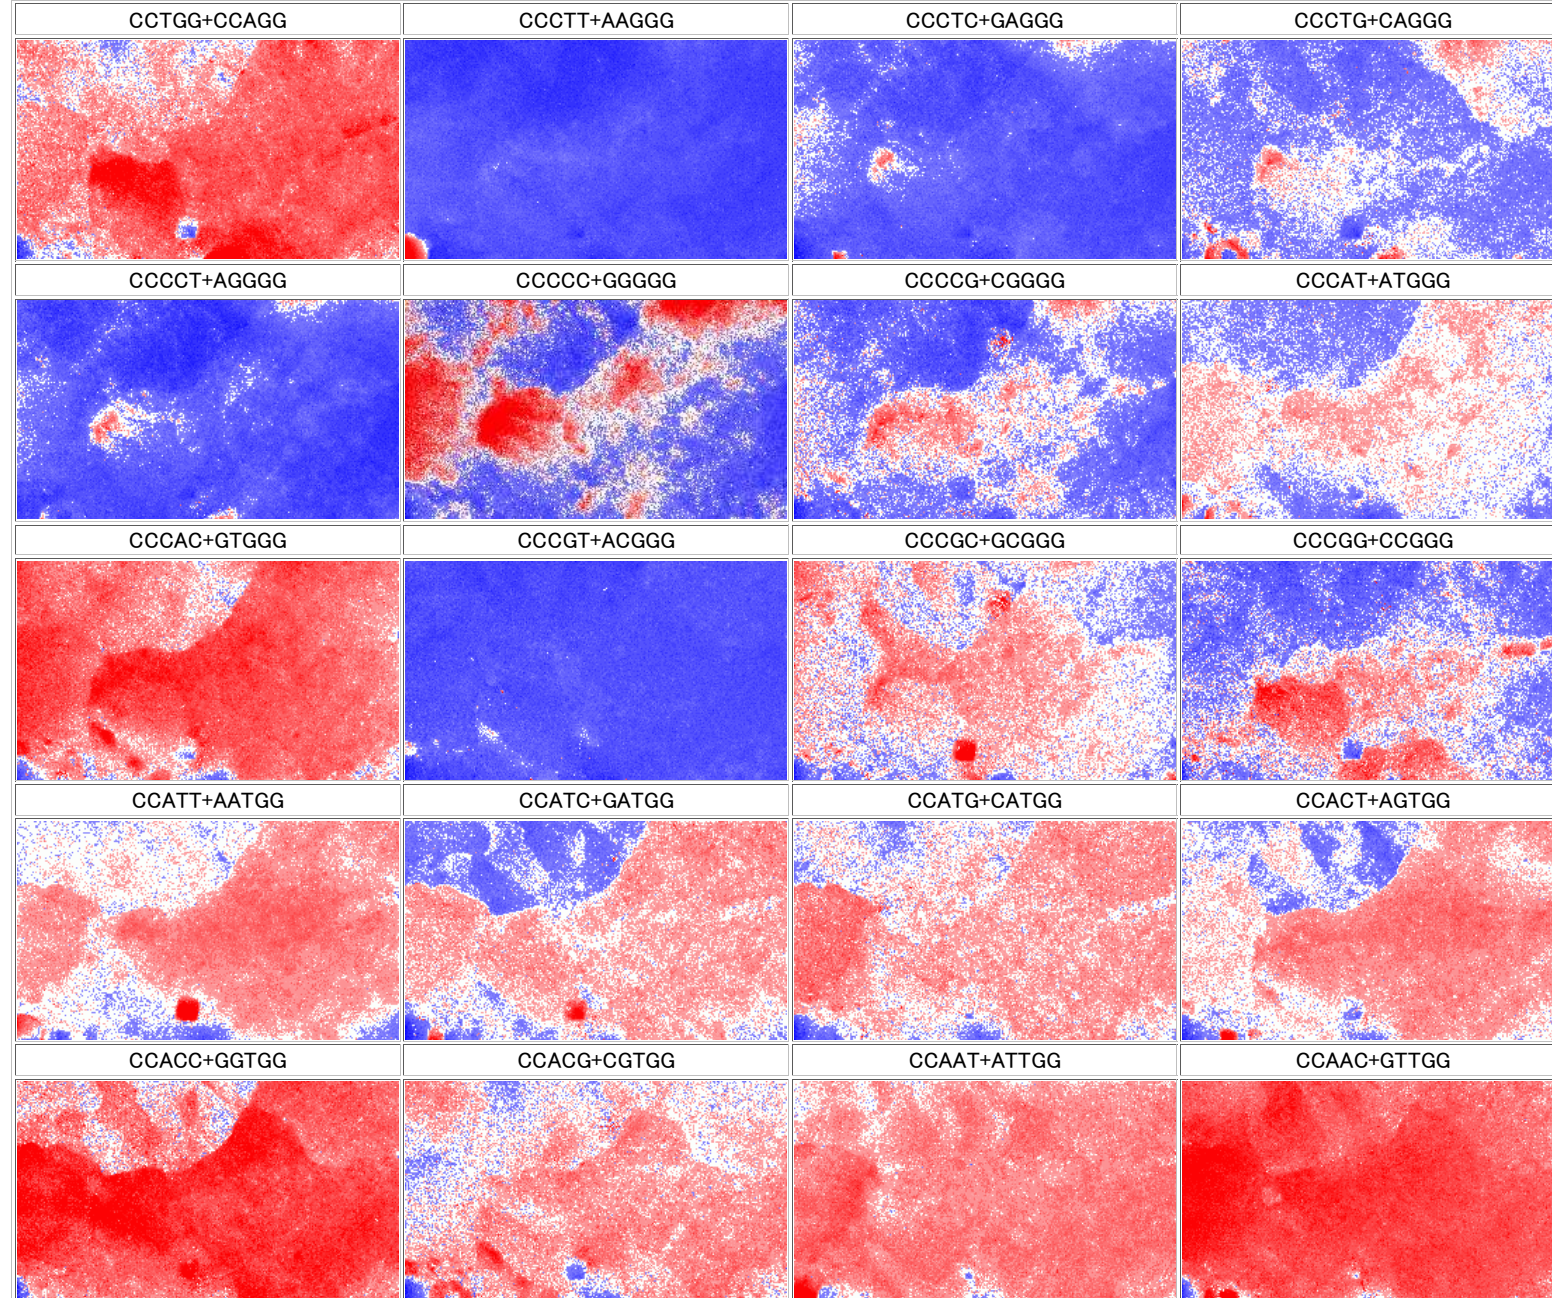



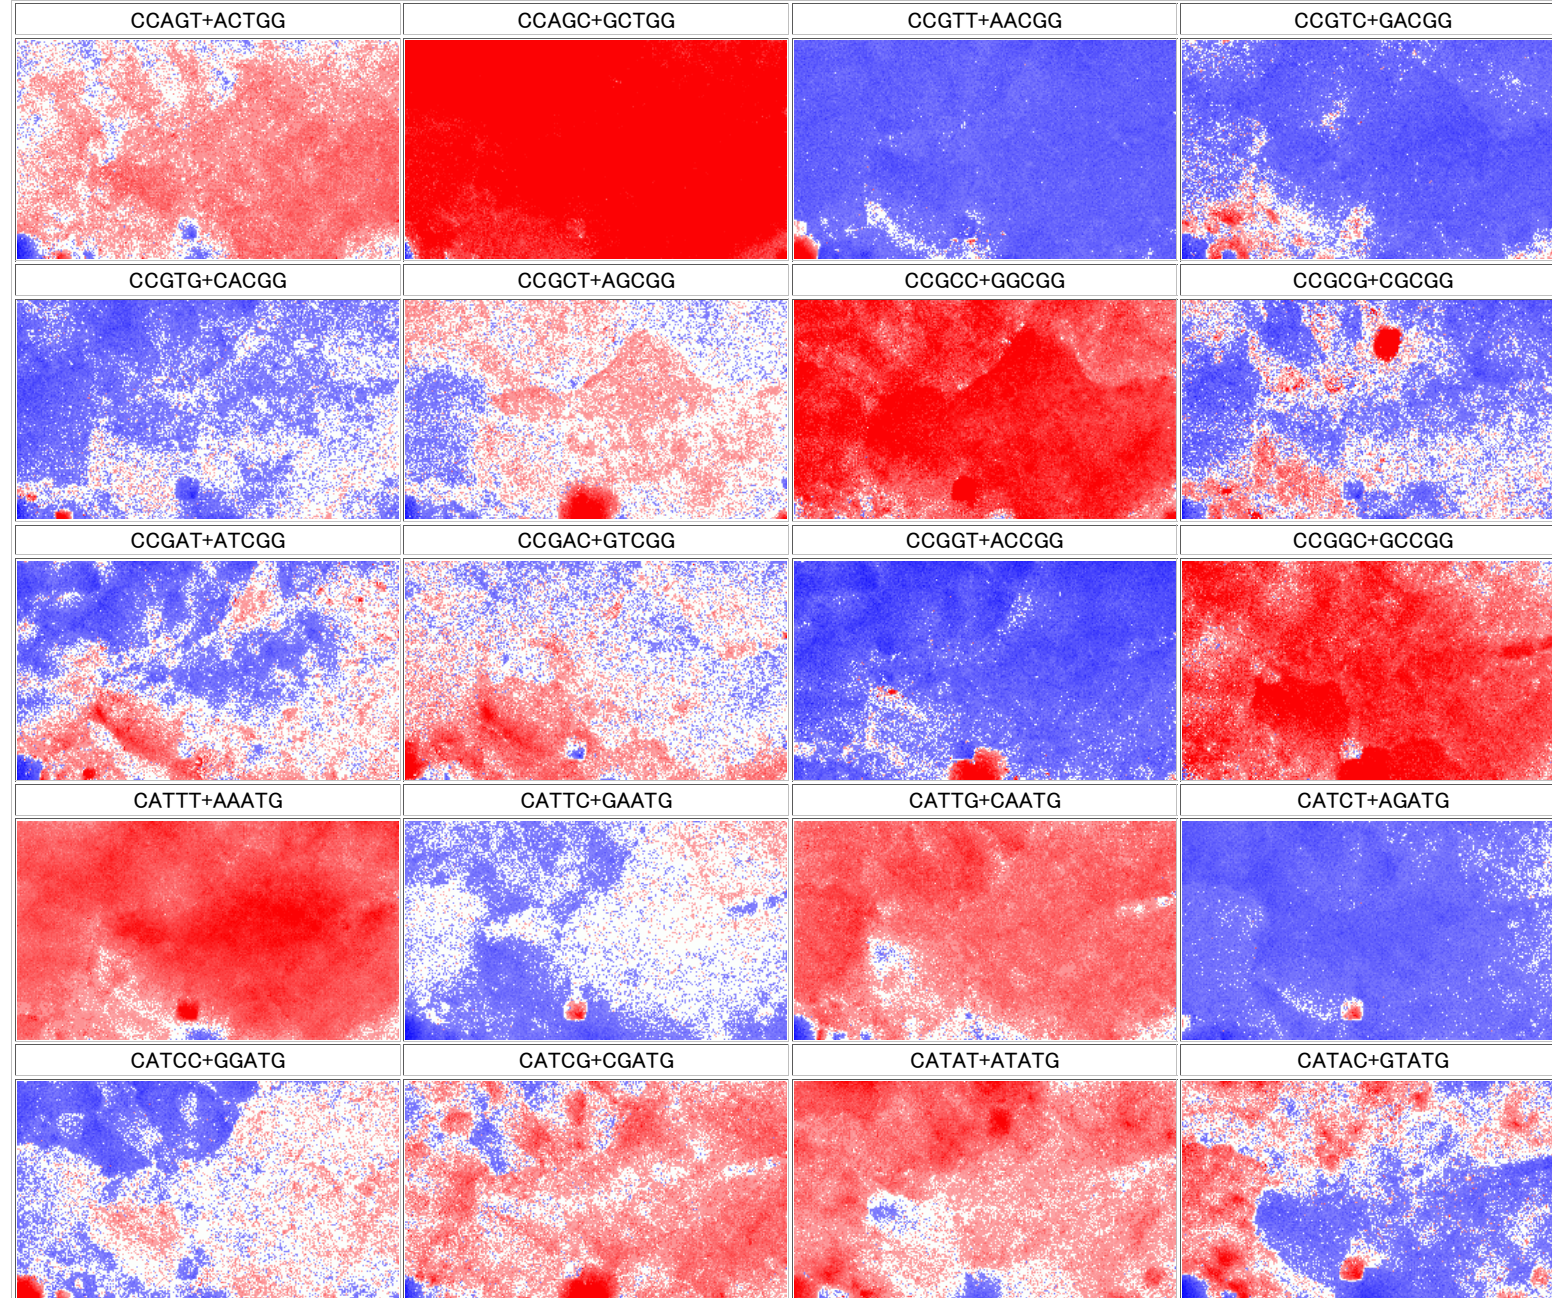

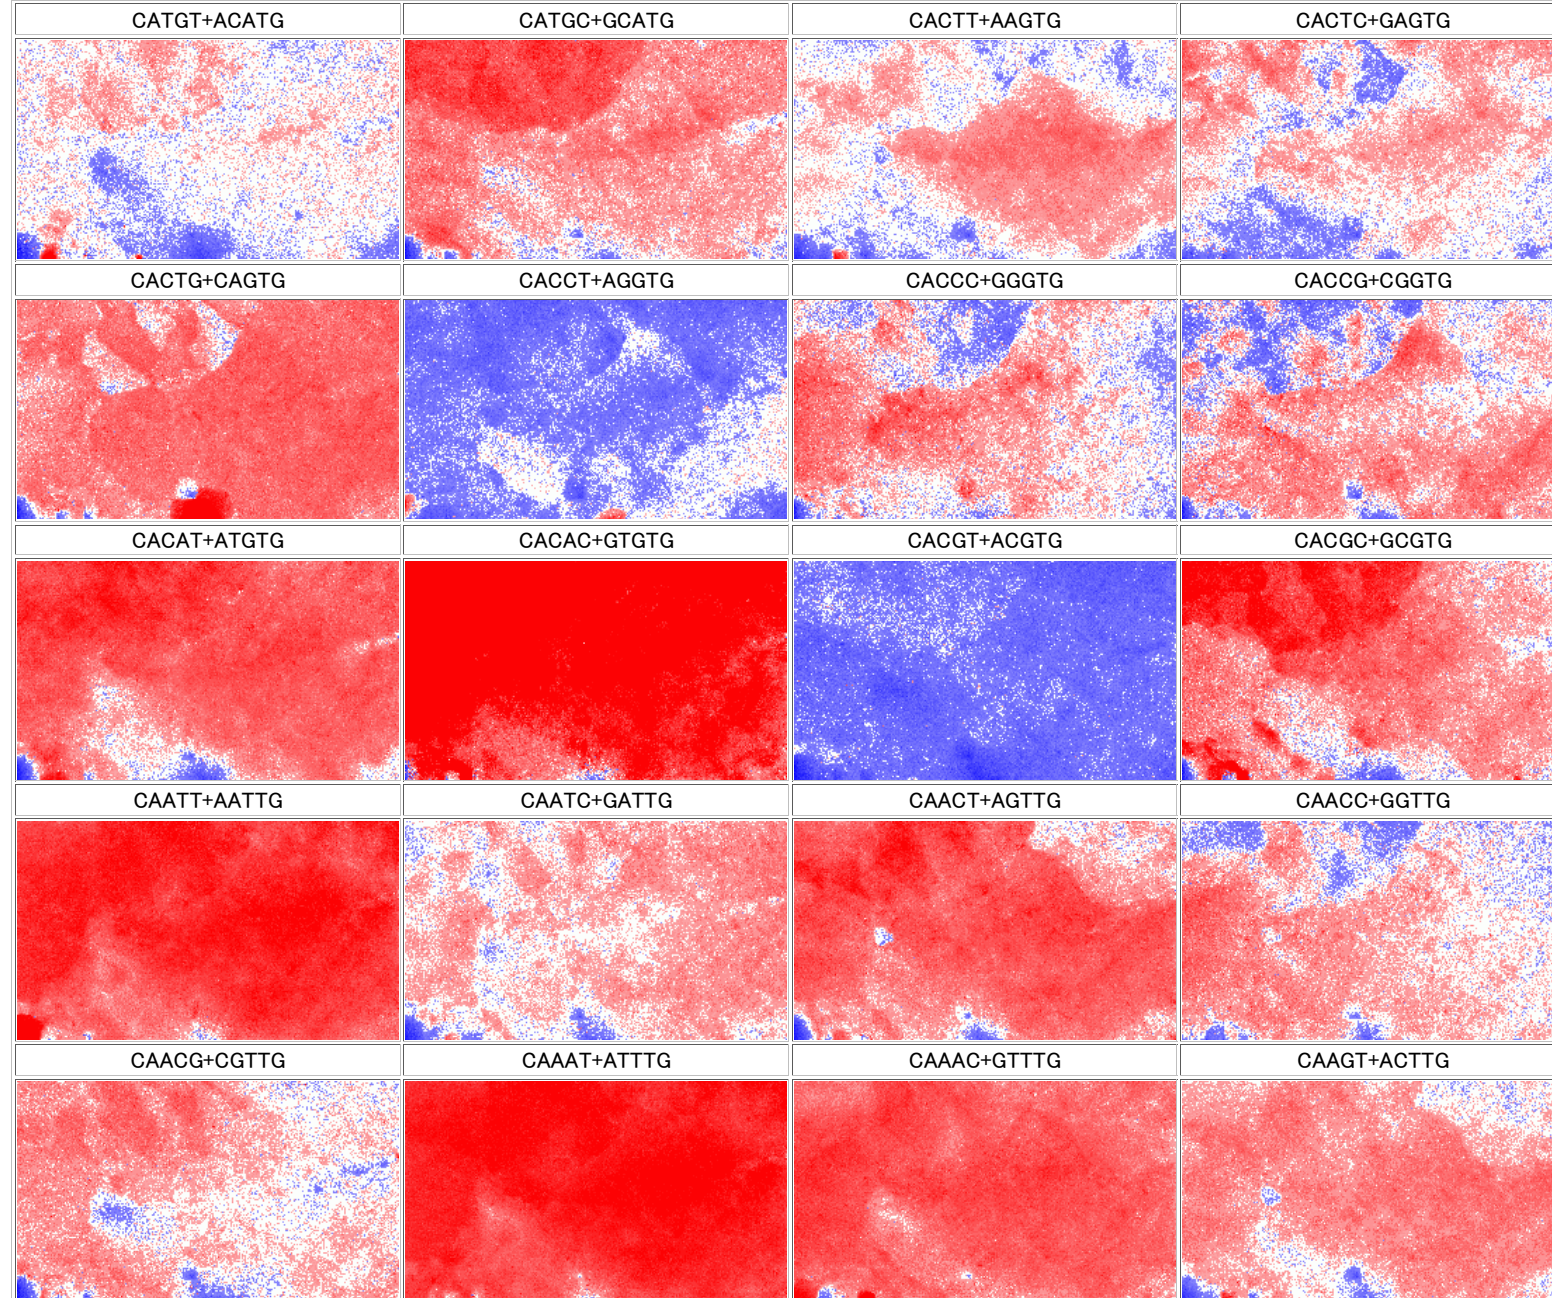

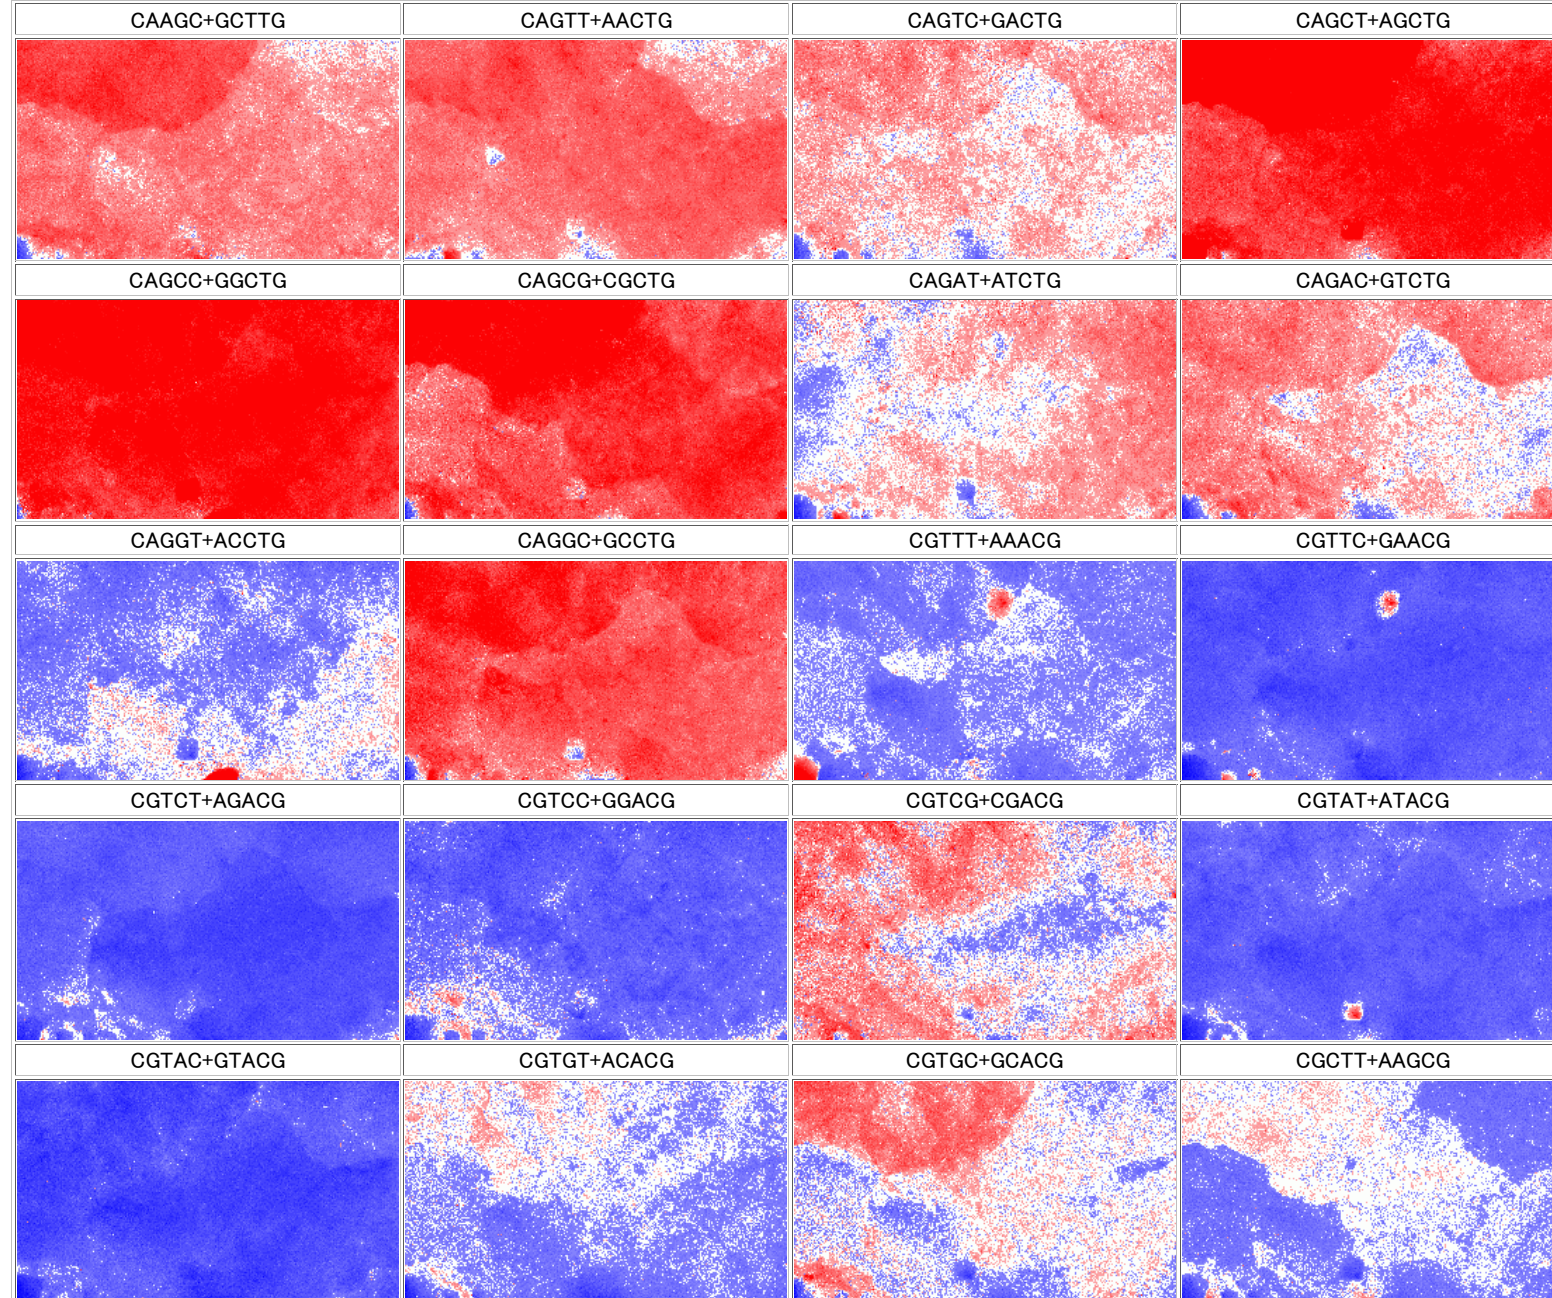

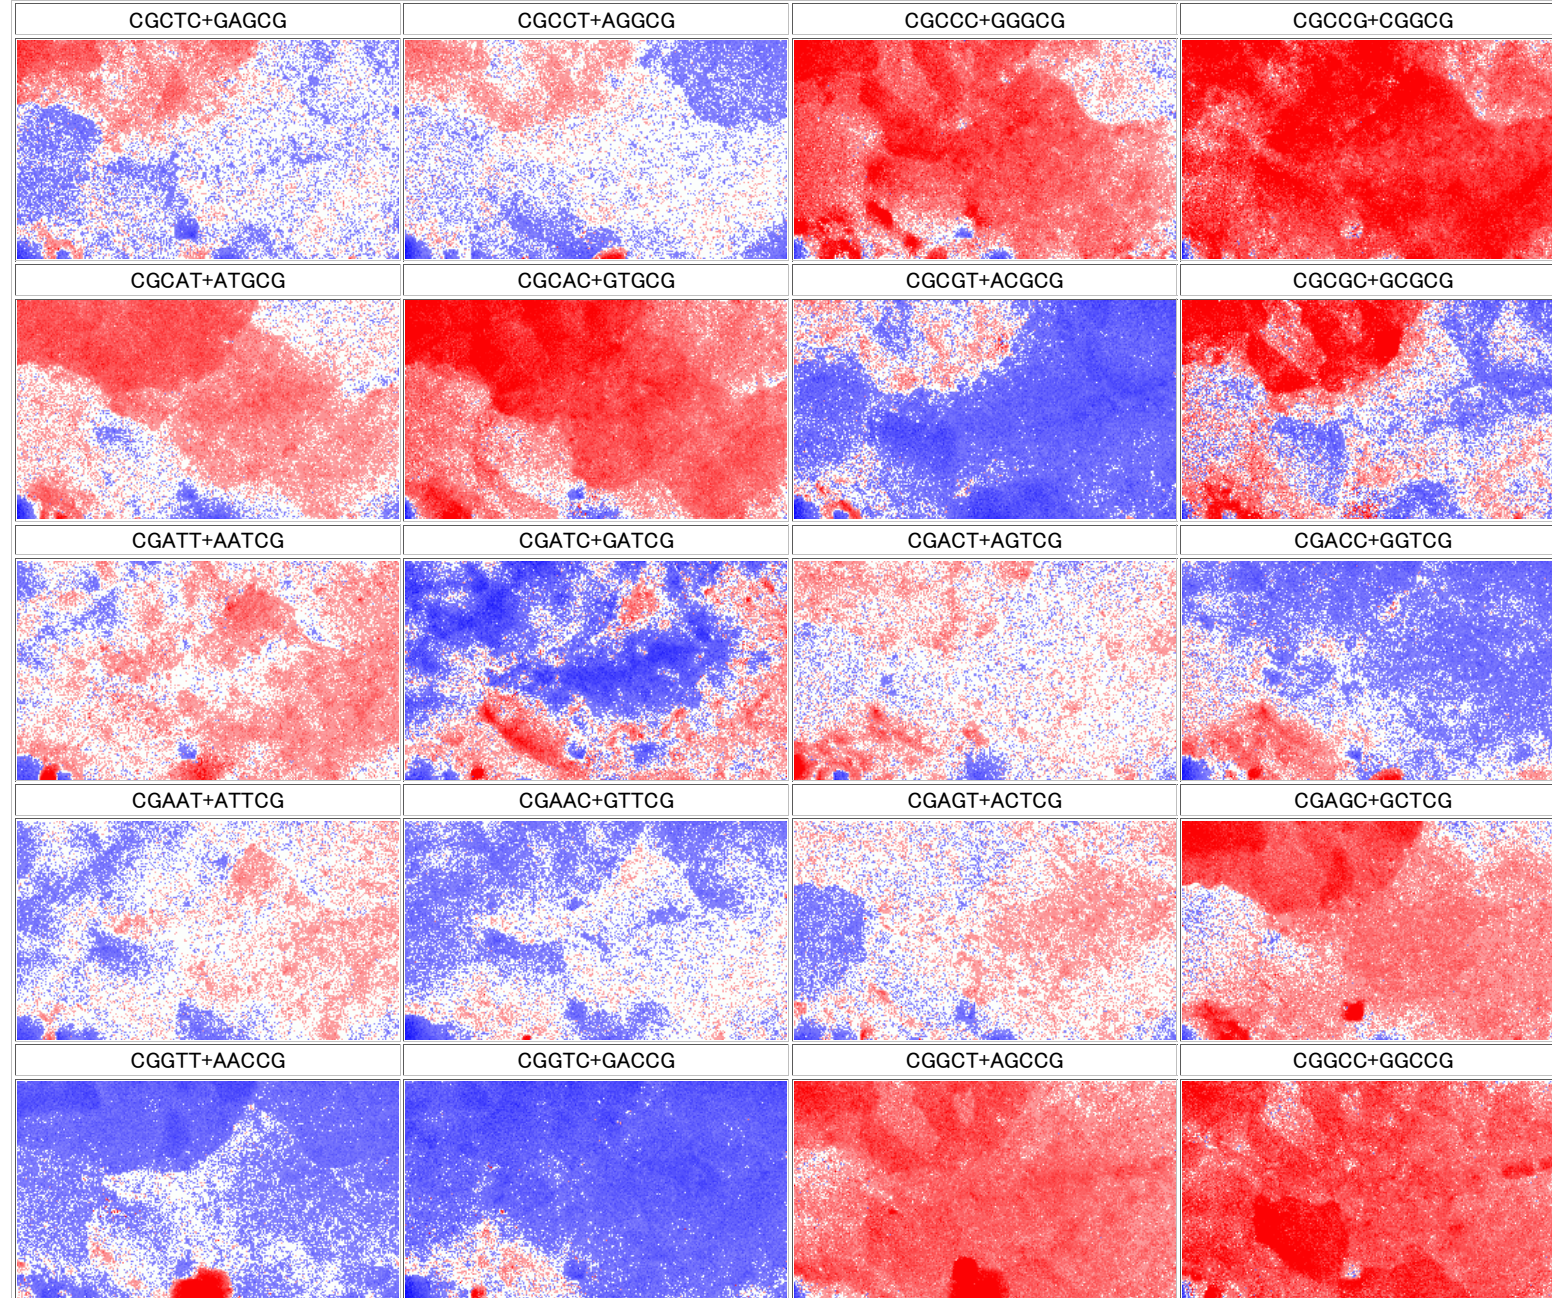

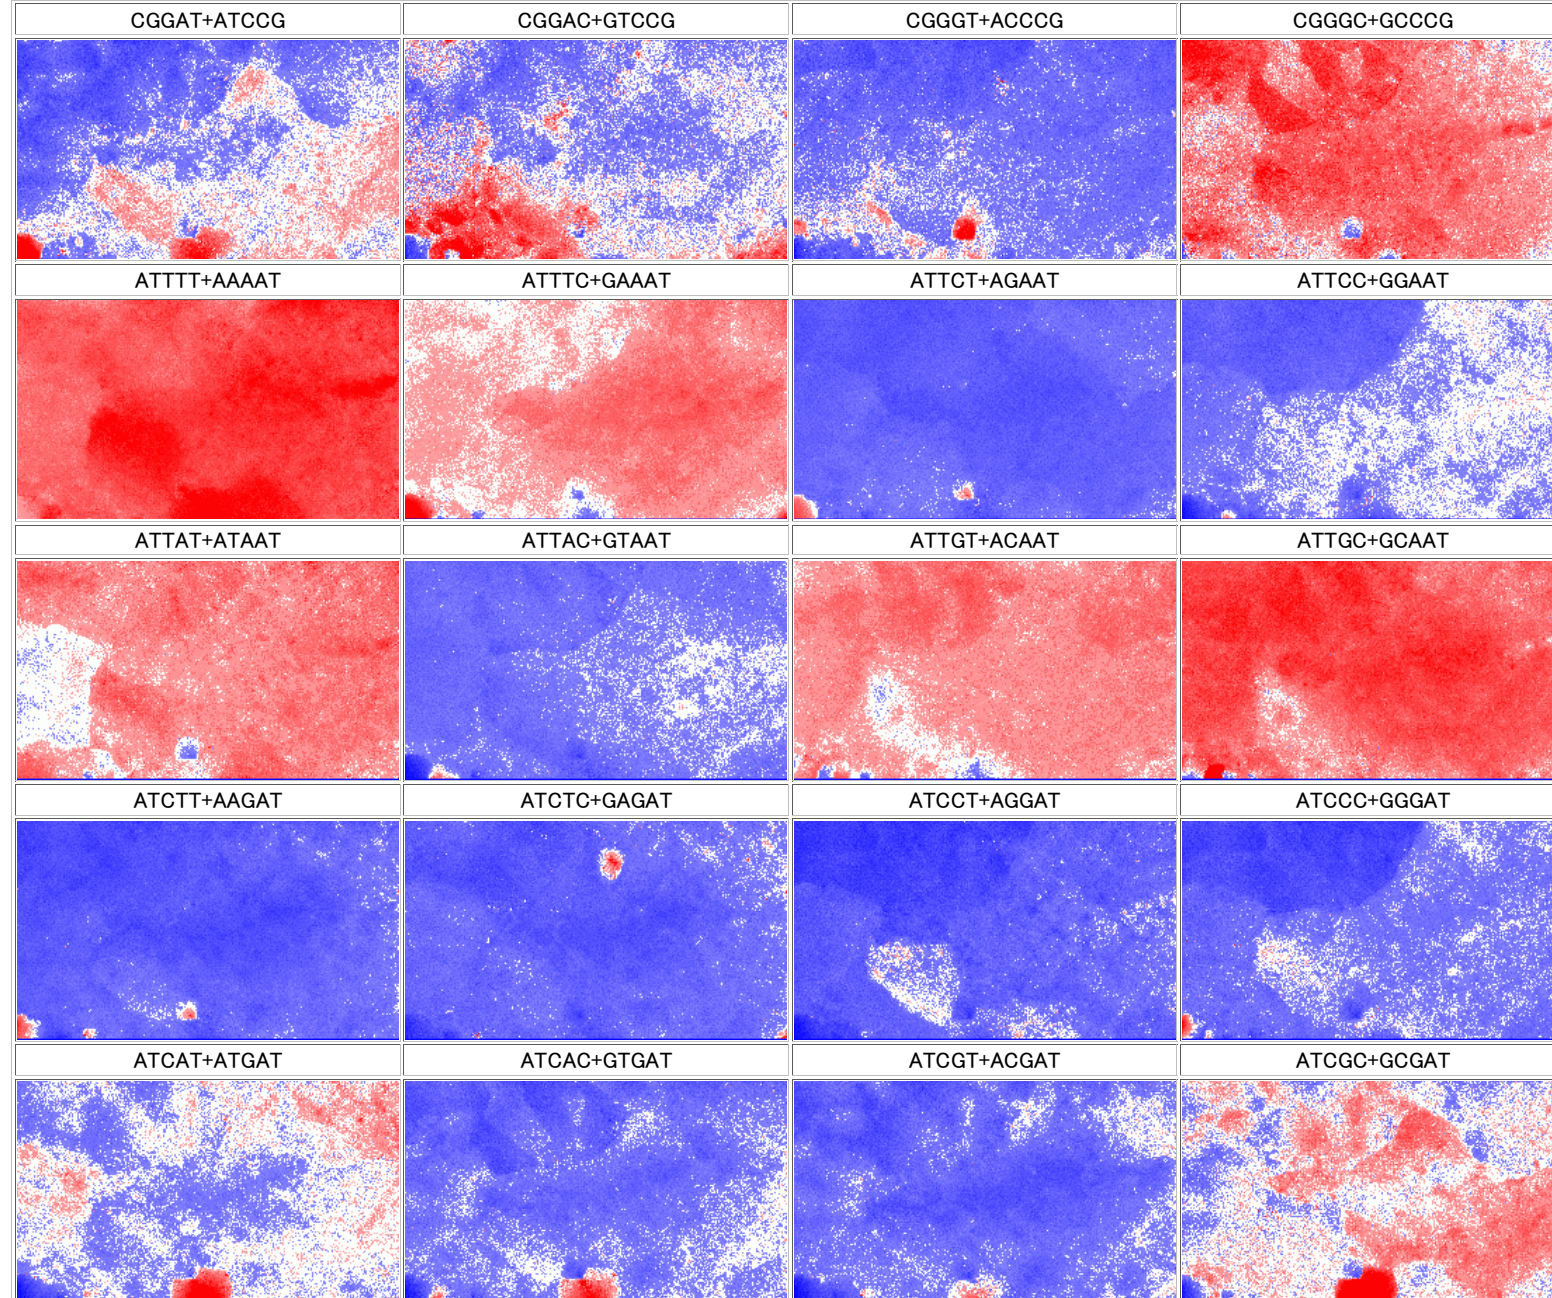

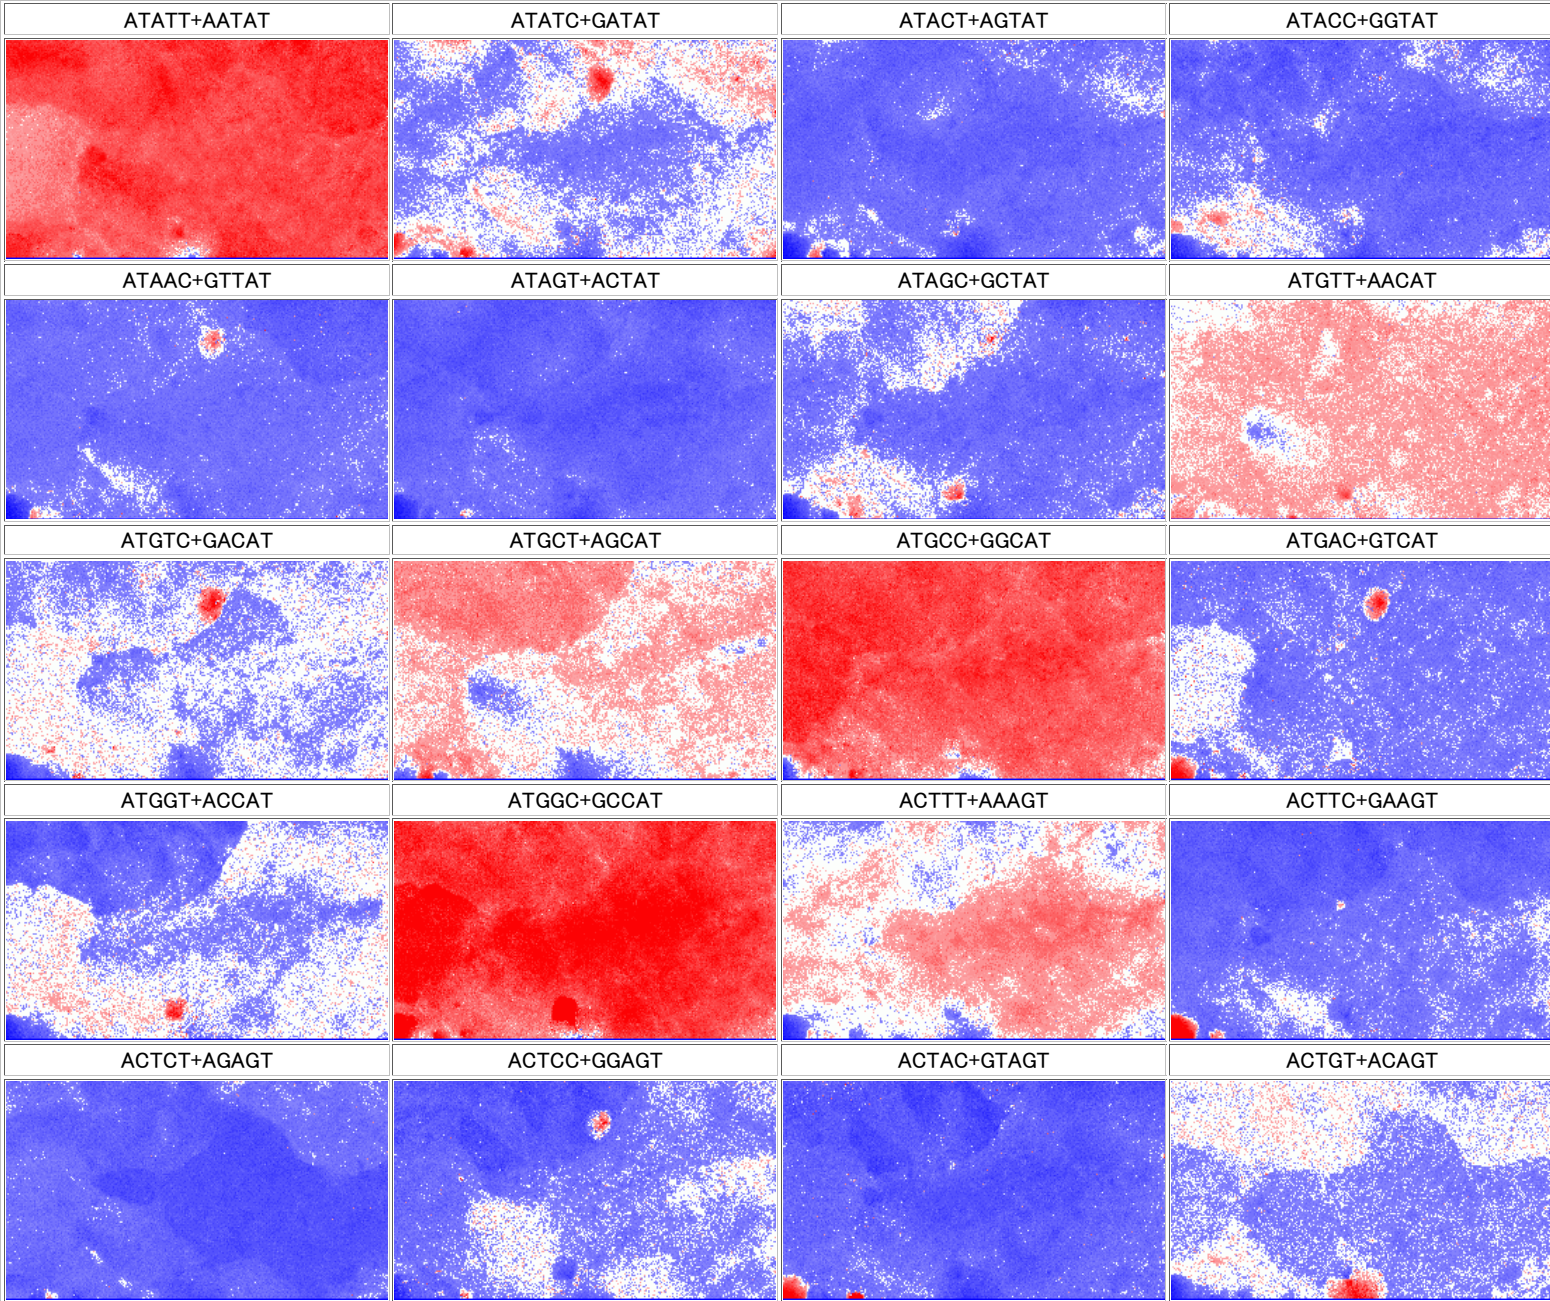

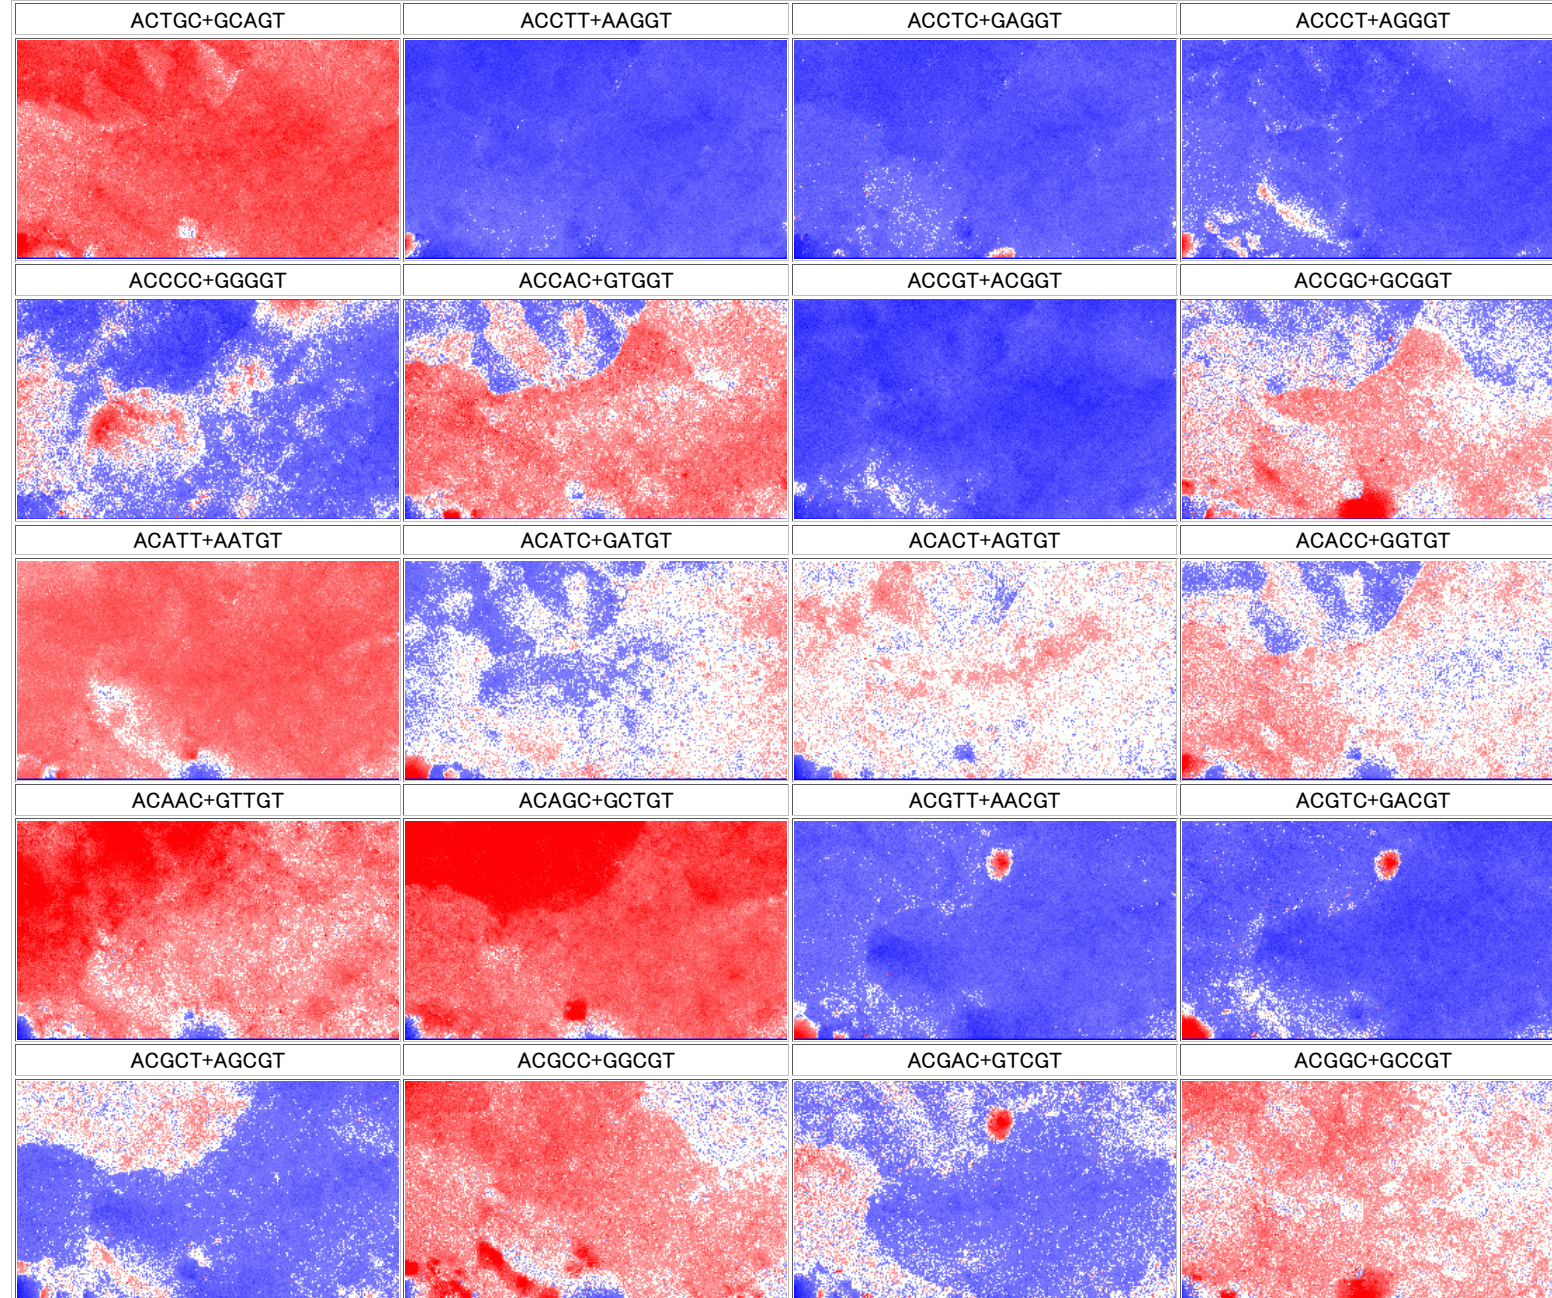

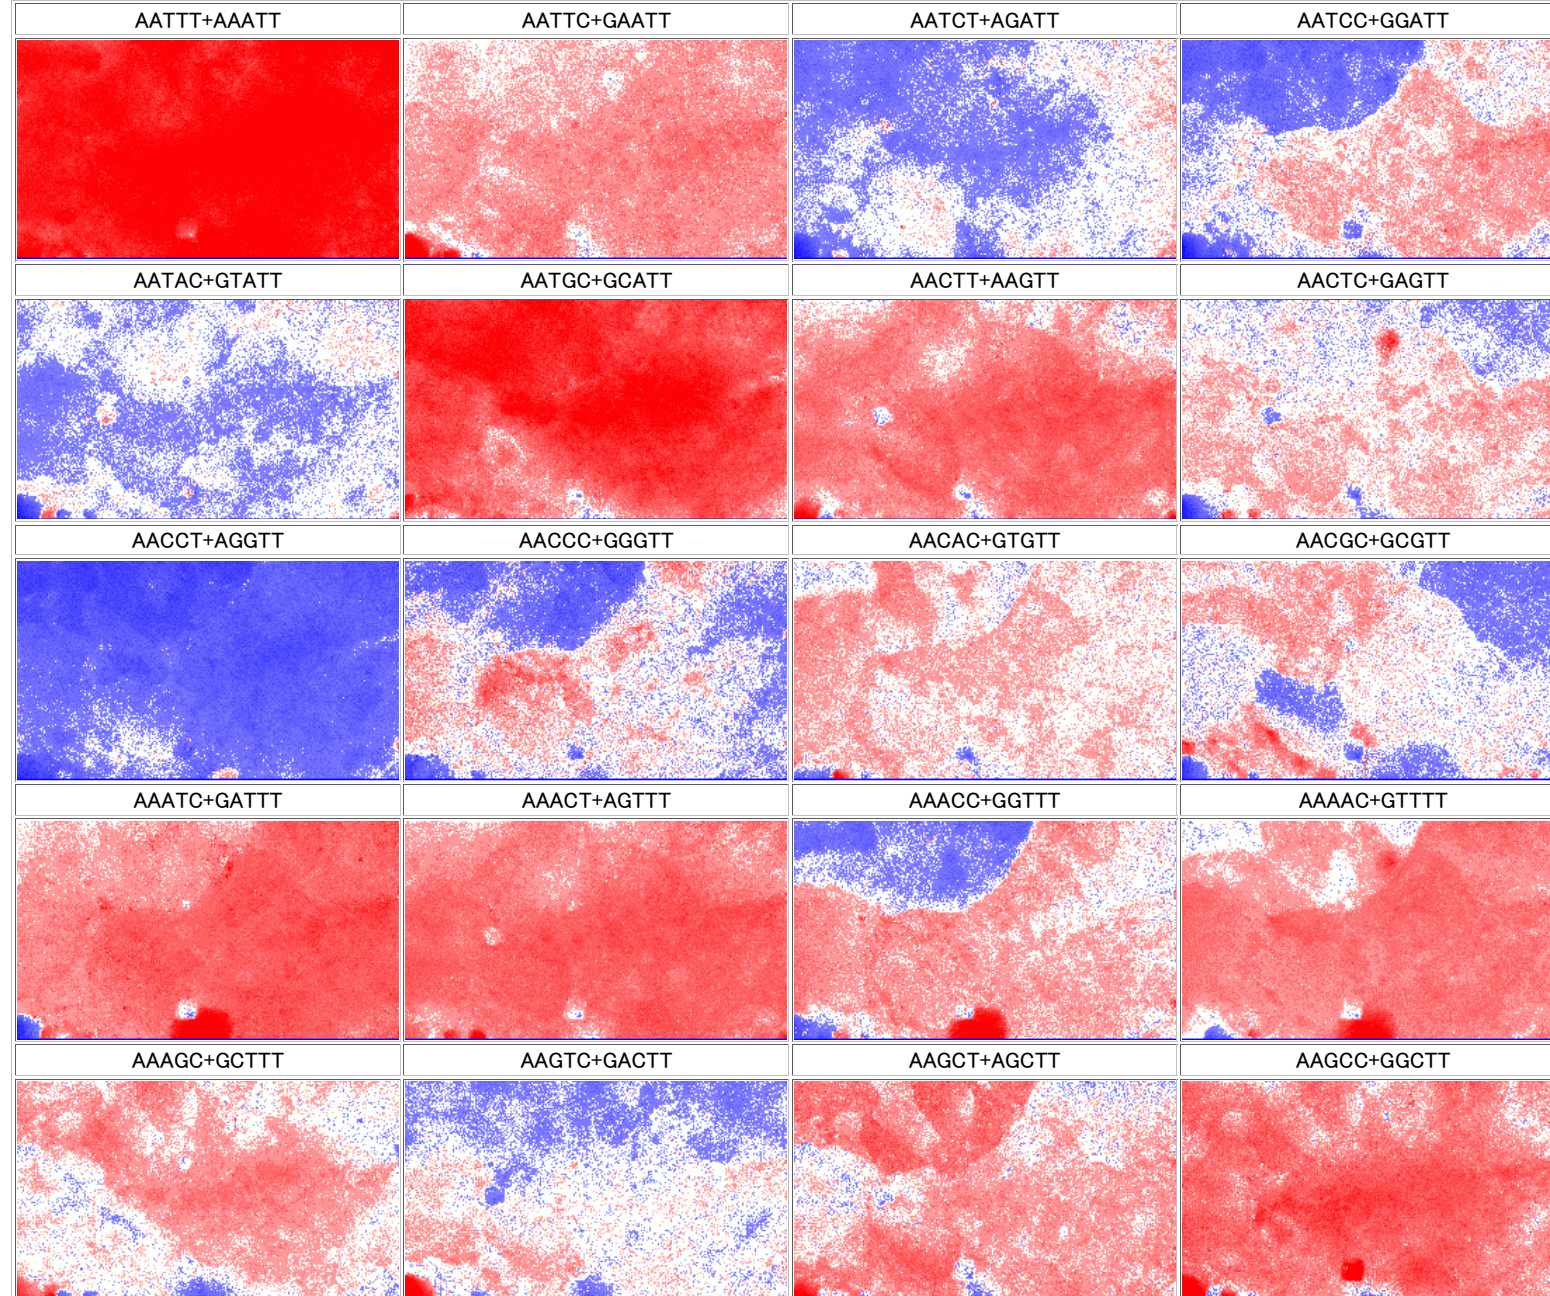



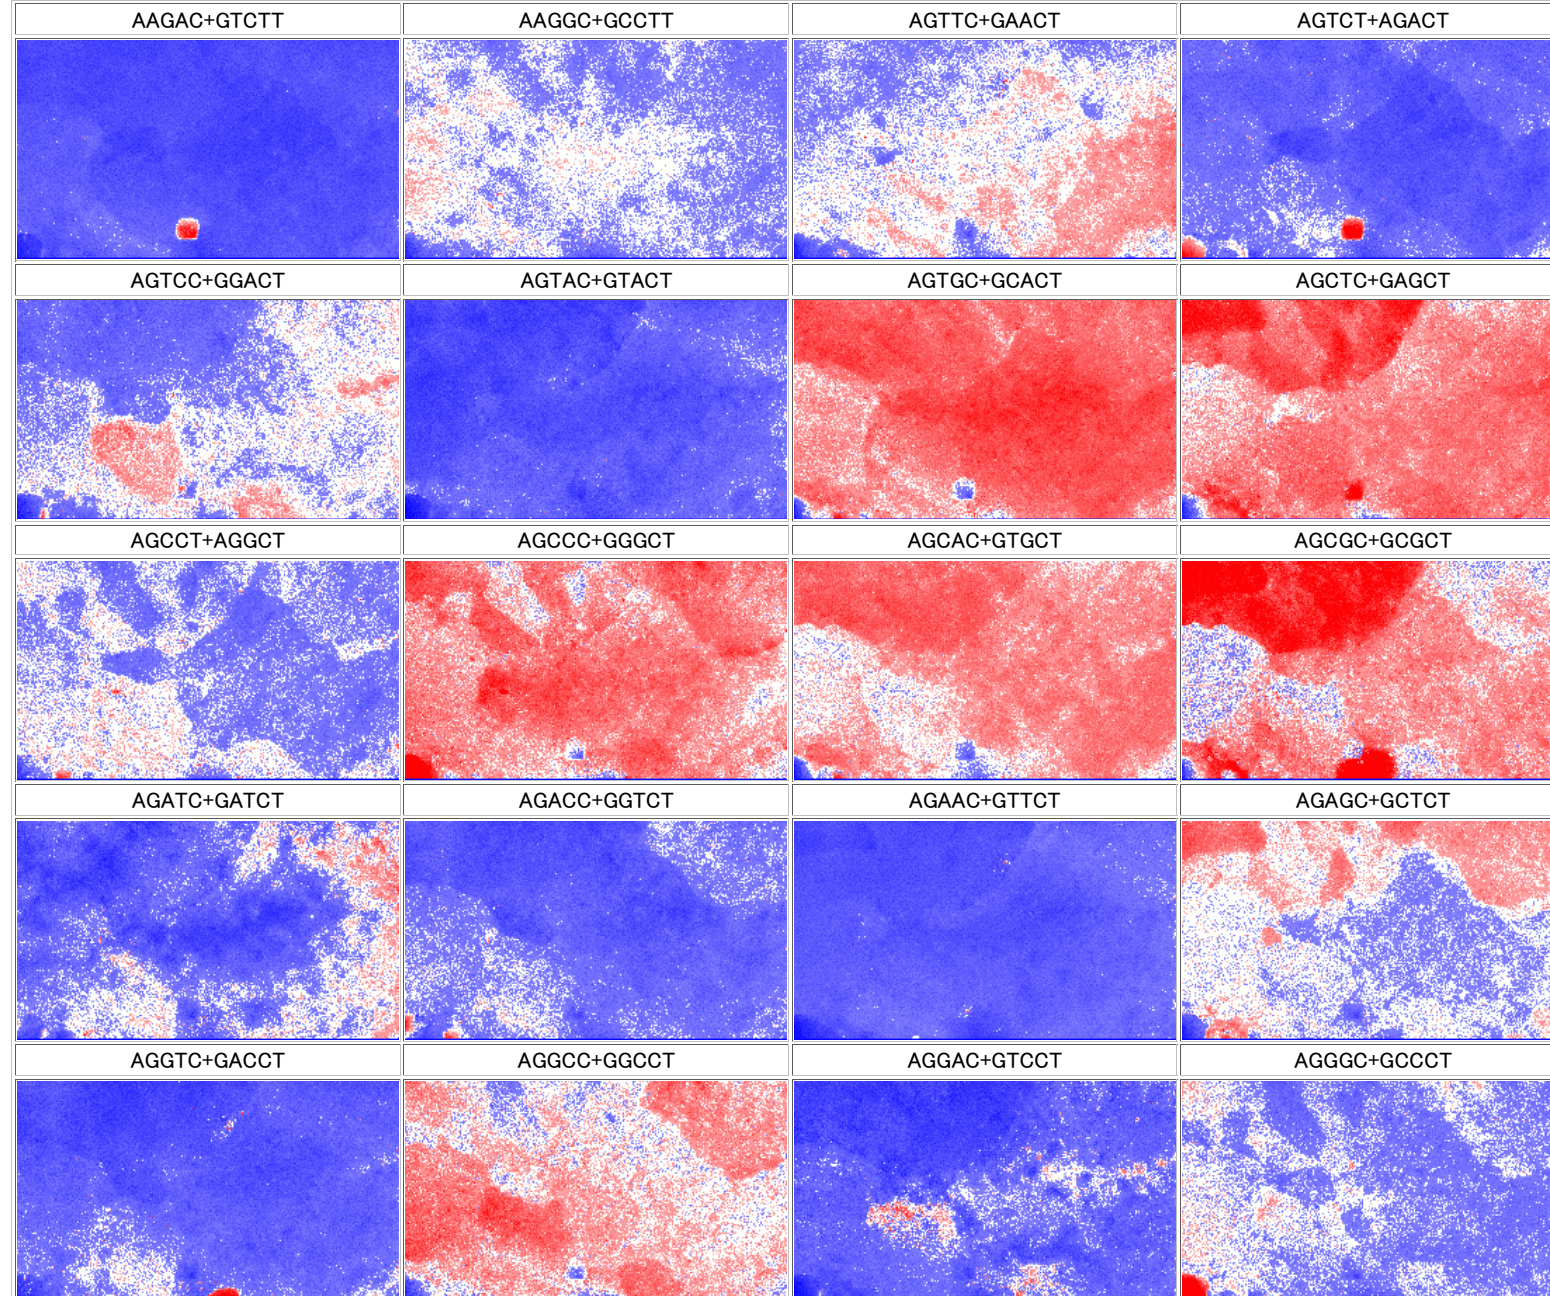

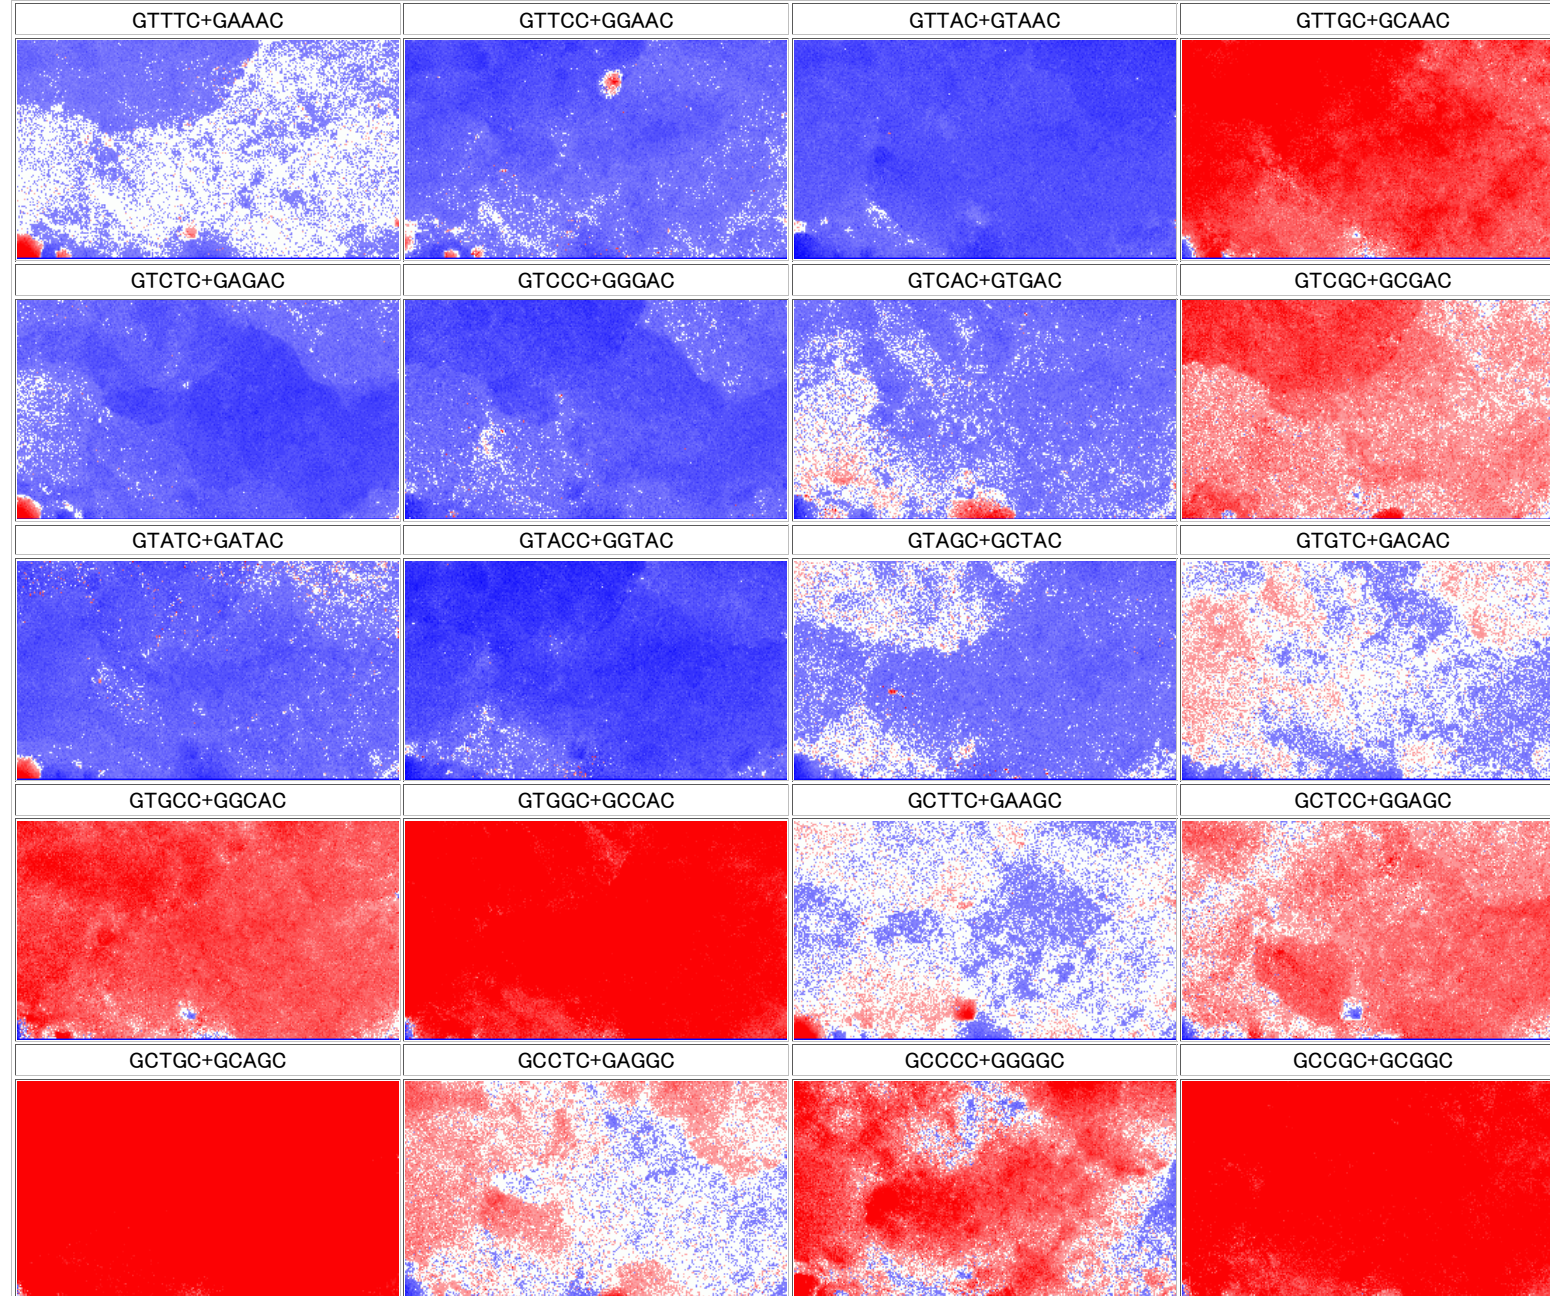

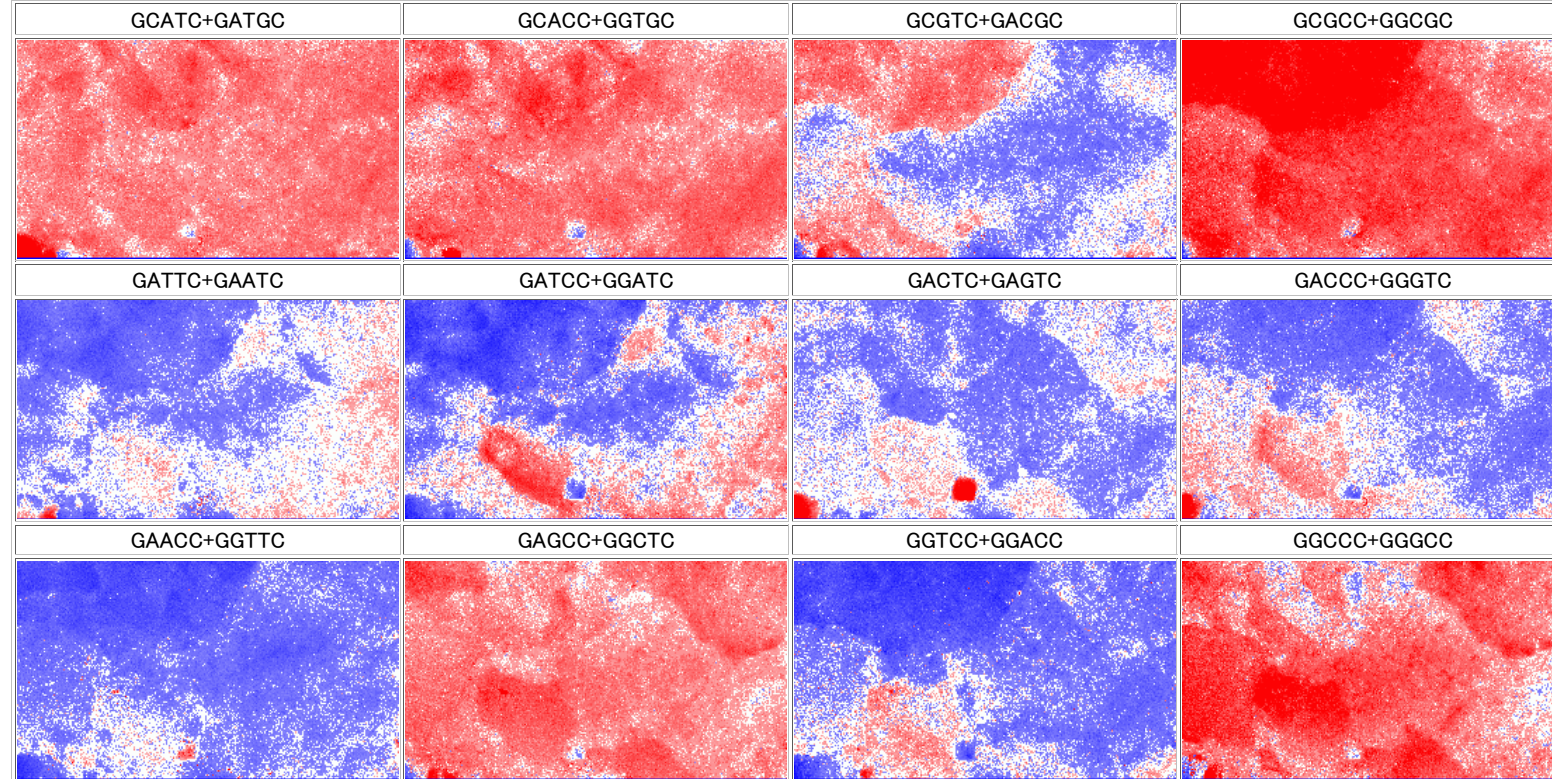

Supplement: f1 [file 985706.f1.pdf]
